# Supplementary material for: Participatory ethnobotany: comparison between two quilombos in the Atlantic Forest, Ubatuba, São Paulo, Brazil
Source: PeerJ. 2023 Nov 7;11:e16231. doi: 10.7717/peerj.16231 (PMC10637247; doi:10.7717/peerj.16231)
Supplement: Supplemental Information 1 [file peerj-11-16231-s001.xlsx]

## Sheet: General use
community	cambury	cambury	cambury	cambury	cambury	cambury	cambury	cambury	cambury	cambury	fazenda	fazenda	fazenda	fazenda	fazenda	fazenda	fazenda	fazenda
informant	Alcides Jorge	Cremilda_da_Cruz_Catarina	Domingos	Eliete	Euclides_jr	Isac	José	Maximiano	Moises Firmino	Oziel Soares	Cirillio	Dn_Aparecida	Dn_Maria	Dn_onofria	Luciana_vieira	Maria_aparecida_vieira	Jose_vieira	vinturante_manoel
Achillea millefolium L.	0	1	0	0	0	0	0	0	0	0	0	0	0	0	0	0	0	0
Achyrocline flaccida(Weinm.) DC.	0	0	0	0	0	0	0	0	0	0	0	2	0	0	0	0	0	0
Aegiphila integrifolia (Jacq.) Moldenke	1	0	0	0	0	0	0	0	0	1	2	0	0	0	0	0	0	0
Ageratum conyzoides L.	0	0	0	0	0	0	0	0	0	0	0	0	0	1	0	0	0	0
Alternanthera brasiliana (L.) Kuntze	0	0	0	0	0	0	0	0	0	0	0	0	0	0	0	0	0	0
Amaranthus blitum L.	0	0	0	0	0	0	0	0	0	0	0	1	0	0	0	0	0	0
Anacardium occidentale L.	0	0	0	0	0	0	0	0	0	0	1	0	1	0	0	0	0	0
Aniba sp.	0	0	0	0	0	0	1	0	0	0	1	0	0	0	0	0	1	0
Annona dolabripetala Raddi	0	0	0	1	0	1	0	2	0	1	1	0	0	0	0	0	0	0
Annona muricata L.	0	0	0	0	0	0	0	0	0	0	1	0	0	0	0	0	0	0
Artocarpus altilis (Parkinson) Fosberg	0	0	0	0	0	0	0	0	0	0	1	0	0	0	0	0	0	0
Astrocaryum aculeatissimum (Schott) Burret	0	0	0	0	0	0	1	0	0	1	2	0	0	0	0	0	0	0
Baccharis sp. [Sect. Caulopterae DC.]	0	0	0	0	0	0	0	0	0	0	0	0	3	0	0	0	0	0
Bactris gasipaes Kunth	0	0	0	0	0	0	0	0	0	0	1	0	0	0	0	0	0	0
Bambusa cf. vulgaris Schrad. ex J.C.Wendl.	0	0	0	0	0	0	0	0	0	0	0	1	0	0	0	0	0	0
Bambusa sp.	0	0	0	0	0	0	0	2	0	0	0	1	0	0	0	0	0	0
Bathysa mendoncaei K.Schum.	0	0	0	0	0	0	0	0	0	0	0	0	0	0	0	0	0	1
Bidens pilosa L.	0	0	0	0	0	0	0	0	0	0	0	0	0	0	0	0	0	0
Bixa orellana L.	1	0	0	0	0	0	0	0	0	0	1	1	0	0	0	0	0	0
Brassica oleracea L. [Gr. Acephala]	0	0	0	0	0	0	0	0	0	0	0	0	0	0	1	0	0	0
Buchena viakleinii Exell	0	0	0	0	0	0	0	1	0	0	0	0	0	0	0	0	0	0
Bunchosia glandulifera (Jacq.) Kunth	0	0	0	0	0	0	0	0	0	0	1	0	0	0	0	1	0	0
Campomanesia phaea (O.Berg) Landrum	0	0	0	0	0	0	0	2	0	1	1	0	0	1	0	0	0	0
Capsicum sp.	0	0	0	0	0	0	0	0	0	0	0	0	1	1	0	0	0	0
Cecropia cf. pachystachya Trécul	0	0	0	0	0	0	0	0	0	0	0	0	0	0	0	0	0	0
Cecropia glaziovii Snethl.	0	0	0	0	0	0	1	0	0	1	1	0	0	0	0	0	0	0
Cecropia pachystachya Trécul	0	0	0	0	0	0	0	0	0	0	1	0	0	0	0	0	0	0
Cedrela fissilis Vell.	0	0	0	0	1	0	0	1	0	1	1	0	0	2	0	0	0	1
cf. Bathysa	0	0	0	0	0	0	0	0	0	0	0	0	0	0	0	0	0	1
cf. Furcraea foetida (L.) Haw.	0	0	0	0	0	0	0	0	0	0	2	0	0	0	0	0	0	0
cf. Pterocarpus rohrii Vahl	0	0	0	0	0	0	0	0	0	0	2	0	0	0	0	0	0	2
cf. Thoracocarpus bissectus (Vell.) Harling	0	0	0	0	0	0	0	0	0	0	0	2	0	0	0	0	0	2
Cichorium cf. intybus L.	0	0	0	0	0	0	0	0	0	0	0	0	0	0	1	0	0	0
Citrus reticulata Blanco	0	0	0	0	0	0	0	0	0	0	1	0	0	0	0	0	0	0
Citrus x limon (L.) Osbeck	0	0	0	1	0	0	0	0	0	0	0	0	0	0	0	0	0	0
Clidemia hirta (L.) D.Don	0	0	0	0	0	0	1	0	0	0	0	0	0	0	1	0	0	0
Coffea arabica L.	0	0	0	0	0	0	0	1	0	1	1	0	0	0	0	1	0	0
Colocasia esculenta (L.) Schott	0	0	0	0	0	0	0	0	0	0	0	0	0	1	1	1	0	0
Conyza cf. bonariensis (L.) Cronquist	0	0	0	0	0	0	0	0	0	0	0	0	0	0	0	0	0	0
Cordia sellowiana Cham.	0	0	0	0	0	0	0	0	0	0	0	0	0	0	0	0	0	0
Cordia sp.	0	0	0	0	0	0	0	1	0	0	0	0	0	0	0	0	2	0
Costus arabicus L.	0	0	0	0	0	0	0	0	0	0	0	0	0	0	0	0	0	0
Cryptocarya mandioccana Meisn.	0	0	0	0	0	0	0	0	0	1	1	0	0	2	1	0	0	0
Cryptocarya saligna Mez	0	0	0	0	0	0	0	0	0	0	1	0	0	0	0	0	1	2
Cupania oblongifolia Mart.	0	0	0	0	0	0	0	2	0	3	1	0	0	0	0	0	0	0
Cuphea carthagenensis (Jacq.) J.F.Macbr.	0	0	0	0	0	0	0	0	0	0	0	0	0	0	0	0	0	0
Curcuma longa L.	0	0	0	0	0	0	0	0	0	0	0	0	0	1	0	0	0	0
Cymbopogon citratus (DC.) Stapf	0	0	0	0	0	0	0	0	0	0	0	0	0	0	1	0	0	0
Cymbopogon nardus (L.)Rendle	0	0	0	0	0	0	0	0	0	0	0	0	0	0	0	0	0	0
Davilla rugosa Poir.	0	0	0	1	0	0	0	0	0	0	0	0	0	0	0	0	0	0
Dioscorea bulbifera L.	0	0	0	0	0	0	0	0	0	0	0	0	0	0	0	0	0	0
Dysphania ambrosioides (L.) Mosyakin & Clemants	0	0	0	0	0	0	0	0	0	0	0	0	0	0	0	0	0	0
Echinodorus grandiflorus (Cham. & Schltdl.) Micheli	0	0	0	0	0	0	0	0	0	0	0	0	0	0	0	0	0	0
Elaeocarpus cf. serratus L.	1	0	0	0	0	0	0	0	0	0	0	0	0	0	0	0	0	0
Emilia sonchifolia (L.) DC.	0	0	0	0	0	0	0	0	0	0	0	1	0	0	0	0	1	0
Erechtites valerianifolius (Wolf) DC.	1	0	0	0	0	0	0	0	0	0	0	1	0	0	0	0	1	0
Eryngium cf. coronatum Hook. & Arn.	0	1	0	0	0	0	0	0	0	0	0	0	0	0	0	0	0	0
Eryngium foetidum L	0	1	1	0	0	0	0	1	0	0	1	0	0	1	1	0	0	0
Erythroxylum pulchrum A.St.-Hil.	0	0	0	0	0	0	0	0	0	0	2	0	0	0	0	0	0	0
Eugenia astringens Cambess.	0	0	0	0	0	0	0	0	0	0	0	0	0	0	0	0	1	0
Eugenia brasiliensis Lam.	0	0	0	0	0	0	0	0	0	0	1	0	0	0	0	0	0	0
Eugenia cf. stipitata McVaugh	0	0	0	0	0	0	0	0	0	0	1	0	0	0	0	0	0	3
Eugenia uniflora L.	0	0	0	0	1	0	0	0	1	0	0	0	1	0	0	0	0	0
Euterpe edulis Mart.	0	0	0	1	0	0	1	1	1	1	0	3	1	0	0	0	0	0
Euterpe oleracea Mart.	0	0	0	0	0	0	0	0	0	0	1	0	0	0	0	0	0	0
Faramea hymenocalyx M.Gomes	0	0	0	0	0	0	0	0	0	0	0	0	0	0	0	0	0	1
Ficus adhatodifolia Schott	0	0	0	0	0	0	3	0	0	0	0	2	0	0	0	0	0	1
Foeniculum vulgare Mill.	0	0	0	0	0	0	0	0	0	0	0	0	0	0	0	1	0	0
Furcraea foetida (L.) Haw. [cf.]	0	0	0	0	0	0	0	0	0	0	0	0	0	0	0	0	0	0
Garcinia gardneriana (Planch. & Triana) Zappi	0	0	0	0	0	0	1	1	0	1	0	0	0	0	0	0	0	1
Geonoma elegans Mart.	0	0	0	0	0	0	0	0	0	0	0	1	0	0	0	0	0	1
Gossypium sp.	1	0	0	0	0	0	0	0	0	0	0	0	0	0	1	0	0	0
Guarea macrophylla Vahl	0	0	0	0	0	0	1	0	0	0	1	0	0	0	0	0	0	0
Guatteria australis A.St.-Hil.	0	0	0	0	0	0	0	0	0	0	0	0	0	0	0	0	0	1
Gymnanthemum amygdalinum (Delile) Sch.Bip. ex Walp.	0	0	0	0	0	0	0	0	0	0	0	0	0	0	0	0	0	0
Handroanthus albus (Cham.) Mattos	0	0	0	0	0	0	1	0	0	1	0	0	0	0	0	0	0	0
Hedychium coronarium J.Koenig	0	0	0	0	0	0	0	0	0	0	0	0	0	0	0	0	0	0
Huberia ovalifolia DC	0	0	0	0	0	0	1	0	0	0	1	0	0	0	0	0	0	0
Hyeronima alchorneoides Allemão	0	0	0	0	0	0	0	0	0	2	1	1	0	0	0	0	0	1
Hymenaea altissima Ducke	1	0	0	0	0	0	0	1	0	1	1	0	0	0	0	0	0	0
Hypochaeris chillensis (Kunth) Britton	0	0	0	0	0	0	0	0	0	0	0	0	0	0	1	0	0	0
Imperata sp.	0	0	0	0	0	0	0	0	0	0	0	1	0	0	0	0	0	0
Inga edulis Mart.	0	0	0	0	0	0	0	0	0	0	2	0	0	0	0	0	0	0
Inga marginata Willd.	0	0	0	0	0	0	0	1	0	0	0	0	0	0	0	0	0	1
Ipomoea batatas (L.) Lam.	1	0	0	1	0	0	0	0	0	0	0	0	0	0	0	0	0	0
Jacaranda puberula Cham.	0	0	0	0	0	0	0	1	0	1	0	0	0	0	0	0	0	0
Justicia pectoralis Jacq.	0	0	0	0	0	0	0	0	0	0	0	0	0	0	0	0	0	0
Lacistema lucidum Schnizl	0	0	0	0	0	0	0	2	0	3	2	0	0	0	0	0	0	0
Lactuca indica L.	0	0	0	0	0	0	0	0	0	0	0	0	0	1	1	0	0	0
Lippia alba (Mill.) N.E.Br. ex P.Wilson	0	0	0	0	0	0	0	0	0	0	0	0	0	0	0	0	0	0
Mabea piriri Aubl.	0	0	0	0	0	0	2	4	0	3	0	0	0	0	0	0	1	1
Manihot esculenta Crantz	0	0	0	0	0	0	0	1	0	0	0	0	0	0	0	0	0	0
Mentha pulegium L.	0	0	0	0	0	0	0	0	0	0	0	1	0	1	0	0	0	0
Miconia cinnamomifolia (DC.) Naudin	0	0	0	0	0	0	0	0	0	1	1	1	0	0	0	0	0	0
Mikania laevigata Sch.Bip. ex Baker	0	0	0	0	0	0	0	0	0	0	0	0	0	0	0	0	0	0
Morus nigra L.	0	0	0	0	1	0	0	2	0	1	1	0	0	0	0	0	0	0
Myrcia neoriedeliana E.Lucas & C.E.Wilson	0	0	0	0	0	0	0	0	0	0	0	0	0	0	0	0	0	1
Myrcia spectabilis DC.	1	0	0	0	0	0	0	0	0	0	2	0	0	0	0	0	0	2
Myrciaria glazioviana (Kiaersk.) G.M.Barroso ex Sobral	0	0	0	0	0	0	0	1	0	0	1	0	0	0	1	1	0	0
Myrocarpus frondosus Allemão	0	0	0	0	0	0	0	0	0	0	0	0	0	0	0	0	1	0
Myrsine coriacea (Sw.) R.Br. ex Roem. & Schult.	0	0	0	0	0	0	1	2	0	2	1	0	0	0	0	0	0	0
Ocimum americanum L.	0	1	0	0	0	0	0	0	0	0	0	0	0	0	1	0	0	0
Ocimum campechianum Mill.	0	1	0	0	0	0	0	1	0	0	0	0	0	1	0	0	0	0
Ocimum gratissimum L.	0	1	0	0	0	0	0	0	0	0	0	0	0	1	0	0	0	0
Pachira glabra Pasq.	0	0	0	0	0	0	0	0	0	0	1	0	0	0	0	0	0	0
Pera glabrata (Schott) Poepp. ex Baill.	0	0	0	0	0	0	0	1	0	1	0	0	0	0	0	0	2	0
Pfaffia glomerata (Spreng.) Pedersen	0	0	0	0	0	0	0	0	0	0	0	0	0	0	0	0	0	0
Philodendron eximium Schott	0	0	0	0	0	0	0	0	0	0	0	3	0	0	0	0	0	1
Philodendron martianum Engl.	0	0	0	0	0	0	0	0	0	0	0	0	0	1	0	0	0	0
Phyllanthus niruri L.	0	0	0	0	0	0	0	0	0	0	0	0	0	0	0	0	0	0
Piper mollicomum Kunth	0	0	0	0	0	0	0	0	0	0	0	0	0	0	0	0	0	0
Piper scutifolium Yunck	0	0	0	0	0	0	0	0	0	0	0	0	0	0	0	0	0	0
Piptadenia gonoacantha (Mart.) J.F.Macbr.	0	0	0	0	0	0	0	0	0	0	0	1	0	0	0	0	1	0
Plantago australis Lam.	1	0	0	0	0	0	0	0	0	0	0	0	0	1	0	0	0	0
Plectranthus amboinicus (Lour.) Spreng.	0	0	0	0	0	0	0	0	0	0	0	0	0	1	0	0	0	0
Plectranthus barbatus Andrews	0	0	0	0	0	0	0	0	0	0	0	0	0	0	0	0	0	0
Plinia edulis (Vell.) Sobral	0	0	0	0	0	1	1	0	0	2	1	0	0	0	0	0	0	0
Polygala paniculata L.	0	0	0	0	0	0	0	0	0	0	0	0	0	0	0	0	0	0
Pouteria caimito (Ruiz & Pav.) Radlk.	0	0	0	0	0	0	0	0	0	0	0	0	0	0	0	1	2	0
Psidium cattleianum Sabine	0	0	0	1	0	0	2	0	0	0	0	0	1	0	0	0	0	0
Psidium guajava L.	1	1	0	0	0	0	1	0	0	0	0	0	0	0	1	0	0	0
Renealmia petasites Gagnep.	0	0	0	0	0	0	0	1	0	0	0	0	0	0	0	0	0	0
Ricinus communis L.	0	0	0	0	0	0	0	0	0	0	0	0	0	0	0	0	1	0
Rubus rosifolius Sm.	0	0	0	0	0	0	0	1	0	0	1	0	0	0	0	0	0	0
Rustia formosa (Cham. & Schltdl.) Klotzsch	0	0	0	0	0	0	0	0	0	2	0	0	0	0	0	0	0	1
Schinus terebinthifoliaRaddi	0	0	0	0	0	0	0	0	0	0	0	1	0	0	0	0	0	0
Schizolobium parahyba (Vell.) S.F.Blake	0	0	0	0	0	0	0	0	0	0	0	1	0	0	0	0	0	0
Sida planicaulis Cav.	0	0	0	0	0	0	0	1	0	0	0	0	1	0	0	0	1	0
Sida rhombifolia L.	0	0	0	0	0	0	0	0	0	1	0	0	1	0	0	0	1	0
Solanum americanum Mill.	0	0	0	0	0	0	0	0	0	0	1	1	0	0	0	0	0	0
Solanum capsicoides All.	0	0	0	0	0	0	0	0	0	0	0	0	0	0	0	0	0	0
Solanum pseudoquina A.St.-Hil.	1	0	0	0	0	0	2	1	0	2	1	0	0	0	0	0	0	0
Sorocea cf. guilleminiana Gaudich.	0	0	0	0	0	0	0	0	0	3	2	0	0	0	0	0	0	0
sp. 2 - Myrtaceae	0	0	0	0	0	0	0	0	0	0	0	0	0	0	0	0	0	2
Stachytarpheta cayennensis (Rich.) Vahl	0	0	0	0	0	0	0	0	0	0	0	0	0	0	0	0	0	0
Swartzia oblata R.S.Cowan	0	0	0	0	0	0	0	0	0	1	0	0	0	0	0	0	0	0
Swartzia simplex var. grandiflora (Raddi) R.S.Cowan	0	0	0	0	0	0	0	1	0	3	1	0	0	0	0	0	3	1
Syagrus pseudococos (Raddi) Glassman	0	0	0	0	0	0	0	0	0	0	2	3	0	0	0	0	0	1
Syzygium jambos (L.) Alston	0	0	0	0	0	0	0	0	0	0	1	0	0	0	0	0	0	0
Syzygium malaccense (L.) Merr. & L.M.Perry	0	0	0	0	0	0	0	0	0	1	1	0	0	0	0	0	0	0
Tabernaemontana laeta Mart.	0	0	0	0	0	0	0	0	0	0	1	0	0	0	0	0	0	0
Theobroma cacao L.	0	0	0	0	0	0	0	1	0	1	1	0	0	0	0	0	0	0
Typha domingensis Pers.	0	0	0	0	0	0	1	0	0	0	0	0	1	0	1	1	0	0
Urera baccifera (L.) Gaudich. ex Wedd.	0	0	0	0	0	0	0	0	0	0	0	0	0	1	0	0	0	0
Varronia curassavica Jacq.	0	0	0	0	0	0	0	0	0	0	0	0	0	0	0	0	0	0
Vernonanthura beyrichii (Less.) H.Rob.	0	0	0	0	0	0	0	0	0	0	0	0	1	0	0	0	1	0
Xanthosoma taioba E.G.Gonç.	0	0	0	1	0	0	0	0	0	1	1	1	0	1	0	0	0	0
Zanthoxylum rhoifolium Lam.	0	0	0	0	0	0	1	0	0	0	0	1	0	0	0	0	0	0
Aleurites moluccanus (L.) Willd	0	0	0	0	0	0	2	0	0	1	0	0	0	0	0	0	0	0
Allium chinense G. Don	0	1	0	0	0	0	0	0	0	0	0	0	0	0	0	0	0	0
Allium fistulosum L.	0	1	0	0	0	0	0	0	0	0	0	0	0	0	0	0	0	0
Allium tuberosum	0	1	1	0	0	0	0	0	0	0	0	0	0	0	0	0	0	0
Annona montana Macf.	0	0	0	0	0	0	1	0	0	0	0	0	0	0	0	0	0	0
Artocarpus heterophyllus Lam	0	0	0	0	0	1	0	0	0	0	0	0	0	0	0	0	0	0
Astrocaryum aculeatissimum (Schott) Burret	0	0	0	0	0	0	0	0	0	1	0	0	0	0	0	0	0	0
Bactris sp.	0	0	0	0	0	0	0	0	0	2	0	0	0	0	0	0	0	0
Cajanus cajan (L.) Huth	1	0	0	0	0	0	0	1	0	0	0	0	0	0	0	0	0	0
Citharexylum myrianthum Cham.	0	0	0	0	0	0	0	0	0	1	0	0	0	0	0	0	0	0
Citrus sinensis (L.) Osbeck	0	0	0	0	0	0	1	0	0	0	0	0	0	0	0	0	0	0
Dioscorea sp.	0	0	0	0	0	0	0	1	0	0	0	0	0	0	0	0	0	0
Ecclinusa ramiflora Mart.	0	0	0	1	0	0	3	2	0	2	0	0	0	0	0	0	0	0
Elephantopus mollis Kunth	0	0	0	0	0	0	0	0	1	0	0	0	0	0	0	0	0	0
Eugenia cf. multicostata D. Legrand	0	0	0	0	0	1	0	0	0	3	0	0	0	0	0	0	0	0
Eugenia sp.	0	0	0	0	0	0	0	0	0	1	0	0	0	0	0	0	0	0
Eugenia sulcata Spring ex Mart.	0	0	0	0	0	0	0	1	0	0	0	0	0	0	0	0	0	0
Inga cf. lenticellata Benth.	0	0	0	0	0	0	0	0	0	3	0	0	0	0	0	0	0	0
Jacaratia spinosa (Aubl.) A.DC.	0	0	0	0	0	0	1	0	0	0	0	0	0	0	0	0	0	0
Licania sp.2	0	0	0	0	0	0	0	0	0	2	0	0	0	0	0	0	0	0
Marantaceae sp.2	0	0	0	0	0	0	0	1	0	0	0	0	0	0	0	0	0	0
Miconia dodecandra Cogn.	1	0	0	0	0	0	0	0	0	0	0	0	0	0	0	0	0	0
Miconia prasina (Sw.) DC.	0	0	0	0	0	0	0	1	0	0	0	0	0	0	0	0	0	0
Micropholis crassipedicellata (Mart. & Eichler) Pierre	0	0	0	0	0	0	2	0	0	3	0	0	0	0	0	0	0	0
Mimusops coriacea (A.DC.) Miq.	0	0	0	0	0	0	1	0	0	0	0	0	0	0	0	0	0	0
Musa sp.	1	0	0	0	0	0	0	0	0	0	0	0	0	0	0	0	0	0
Nectandra oppositifolia Nees	1	0	0	0	0	0	2	0	0	2	0	0	0	0	0	0	0	0
Passiflora miersii Mast.	0	0	0	0	0	0	0	0	0	1	0	0	0	0	0	0	0	0
Persea americana Mill.	0	0	0	0	0	0	1	0	0	0	0	0	0	0	0	0	0	0
Phaseolus vulgaris L.	1	0	0	0	0	0	0	0	0	0	0	0	0	0	0	0	0	0
Plinia sp.	0	0	0	0	0	0	1	0	0	1	0	0	0	0	0	0	0	0
Rubus urticifolius Poir.	0	0	0	0	0	0	0	1	0	1	0	0	0	0	0	0	0	0
Solanum scuticum M.Nee	0	0	0	0	0	0	0	0	1	1	0	0	0	0	0	0	0	0
Tetrorchidium sp.	0	0	0	0	0	0	0	0	0	3	0	0	0	0	0	0	0	0
Trichilia silvatica C.DC.	0	0	0	0	0	0	0	0	0	2	0	0	0	0	0	0	0	0
Urera nitida (Vell.) P.Brack	0	0	0	1	0	0	0	0	0	1	0	0	0	0	0	0	0	0
Actinostemon verticillatus (Klotzsch) Baill.	0	0	0	0	0	0	2	1	0	1	0	0	0	0	0	0	0	0
Andira fraxinifolia Benth.	0	0	0	0	0	0	1	0	0	0	0	0	0	0	0	0	0	0
Brosimum guianense (Aubl.) Huber	0	0	0	0	0	0	0	3	0	0	0	0	0	0	0	0	0	0
Cabralea canjerana (Vell.) Mart.	0	0	0	0	1	0	0	0	0	2	0	0	0	0	0	0	0	0
Cariniana estrellensis (Raddi) Kuntze	0	0	0	0	0	0	1	0	0	1	0	0	0	0	0	0	0	0
cf. Hymenolobium janeirense Kuhlm.	0	0	0	0	0	0	0	3	0	0	0	0	0	0	0	0	0	0
Citharexylum myrianthum Cham.	0	0	0	0	0	0	0	0	0	1	0	0	0	0	0	0	0	0
Cordia sp.2	0	0	0	0	1	0	0	0	0	1	0	0	0	0	0	0	0	0
Eriotheca pentaphylla (Vell. & K.Schum.) A.Robyns	0	0	0	0	0	0	0	0	0	2	0	0	0	0	0	0	0	0
Geonoma sp.	0	0	0	0	0	0	2	0	0	0	0	0	0	0	0	0	0	0
Hedyosmum brasiliense Miq.	0	0	0	0	0	0	0	2	0	1	0	0	0	0	0	0	0	0
Inga sp	0	0	0	0	0	0	0	0	0	1	0	0	0	0	0	0	0	0
Pouteria sp.2	0	0	0	0	0	0	0	0	0	2	0	0	0	0	0	0	0	0
Schefflera cf. angustissima (Marchal) Frodin	0	0	0	0	0	0	3	0	0	0	0	0	0	0	0	0	0	0
Stylogyne lhotzkyana (A.DC.) Mez	0	0	0	0	0	0	0	0	0	2	0	0	0	0	0	0	0	0
Tachigali paratyensis (Vell.) H.C.Lima	0	0	0	0	0	0	1	1	0	3	0	0	0	0	0	0	0	0
Tachigali sp.1	0	0	0	0	0	0	1	2	0	0	0	0	0	0	0	0	0	0
Tachigali sp.2	0	0	0	0	1	0	0	2	0	0	0	0	0	0	0	0	0	0
Tibouchina pulchra Cogn.	0	0	0	0	0	2	1	2	0	2	0	0	0	0	0	0	0	0
Virola bicuhyba (Schott ex Spreng.) Warb.	0	0	0	0	0	0	4	1	0	1	0	0	0	0	0	0	0	0
Vitex polygama Cham.	0	0	0	0	0	0	0	1	0	0	0	0	0	0	0	0	0	0
Xylopia brasiliensis Spreng.	0	0	0	0	0	0	1	1	0	1	0	0	0	0	0	0	0	0
Cedrela cf. odorata L	0	0	0	0	0	0	1	0	0	0	0	0	0	0	0	0	0	0
Clusia criuva subsp. parviflora Vesque	0	0	0	0	0	0	2	0	0	1	0	0	0	0	0	0	0	0
Cordia sp.3	0	0	0	0	0	0	1	0	0	0	0	0	0	0	0	0	0	0
Ficus gomelleira Kunth & C.D.Bouché	0	0	0	0	0	0	1	1	0	0	0	0	0	0	0	0	0	0
Malouetia cestroides (Nees ex Mart.) Müll. Arg.	0	0	0	0	2	0	0	0	0	2	0	0	0	0	0	0	0	0
Pourouma guianensis Aubl.	0	0	0	0	0	0	1	0	0	1	0	0	0	0	0	0	0	0
Pouteria sp.1	0	0	0	0	0	0	1	0	0	0	0	0	0	0	0	0	0	0
Pseudopiptadenia leptostachya (Benth.) Rauschert	0	0	0	0	1	0	1	1	0	0	0	0	0	0	0	0	0	0
Tachigali sp.3	0	0	1	0	0	0	0	0	0	0	0	0	0	0	0	0	0	0
Borreria verticillata (L.) G.Mey.	0	0	0	0	0	0	0	0	0	1	0	0	0	0	0	0	0	0
Guapira nitida (Mart. ex J.A.Schmidt) Lundell	0	0	0	0	0	0	0	1	0	0	0	0	0	0	0	0	0	0
Maytenus ardisiaefolia Reissek	0	0	0	0	0	0	0	0	0	1	0	0	0	0	0	0	0	0
Merostachys argyronema Lindm.	1	1	1	0	0	0	0	2	0	0	0	0	0	0	0	0	0	0
Myrcia sp.2	0	0	0	0	0	0	0	1	0	0	0	0	0	0	0	0	0	0
Myrcia sp.3	0	0	0	0	0	0	1	0	0	0	0	0	0	0	0	0	0	0
Dalbergia frutescens (Vell.) Britton	0	0	0	0	0	0	0	1	0	0	0	0	0	0	0	0	0	0
Trema micranta (L.) Blume	0	0	0	0	0	0	1	1	0	1	0	0	0	0	0	0	0	0
Myrcia sp.1	0	0	0	0	0	0	0	0	0	2	0	0	0	0	0	0	0	0
Piper cernuum Vell.	0	0	0	0	0	0	0	0	0	1	0	0	0	0	0	0	0	0
Piper cf. gaudichaudianum Kunth	0	0	0	0	0	0	0	0	0	1	0	0	0	0	0	0	0	0
Canavalia ensiformis (L.) DC.	1	0	0	0	0	0	0	0	0	0	0	0	0	0	0	0	0	0
Ctenanthe lanceolata Petersen	0	0	0	0	0	0	0	1	0	0	0	0	0	0	0	0	0	0
Tephrosia candida (Roxb.) DC.	1	0	0	0	0	0	0	1	0	0	0	0	0	0	0	0	0	0
Cyrtocymura scorpioides (Lam.) H.Rob.	0	0	0	0	0	0	0	1	0	0	0	0	0	0	0	0	0	0
Achyrocline sp.1	1	0	0	0	0	0	0	0	0	0	0	0	0	0	0	0	0	0
Marantaceae sp.1	0	0	0	0	0	0	0	0	0	1	0	0	0	0	0	0	0	0
Aloysia gratissima (Gillies & Hook.) Tronc	0	0	0	0	0	0	0	0	0	0	0	0	1	0	0	0	1	0
Ruta graveolens L.	0	0	0	0	0	0	0	0	0	0	1	0	0	0	0	0	1	0
Sansevieria trifasciata Prain	0	0	0	0	0	0	0	0	0	0	0	0	1	0	0	0	0	0
Sansevieria trifasciata 'Laurentii	0	0	0	0	0	0	0	0	0	0	0	0	1	0	0	0	0	0
Petiveria alliacea L.	0	0	0	0	0	0	0	0	0	0	0	0	1	0	0	0	3	0
Tetradenia riparia (Hochst.) Codd	0	0	0	0	0	0	0	0	0	0	0	0	0	0	1	0	0	0
Gallesia integrifolia (Spreng.) Harms	0	0	0	0	0	0	0	0	0	0	0	0	0	0	0	0	1	0
Sambucus cf. canadensis	0	0	0	0	0	0	0	0	0	0	0	0	0	0	0	0	1	0
Scoparia dulcis L.	0	0	0	0	0	0	0	0	0	0	0	0	0	0	0	0	1	0

## Sheet: Food
community	cambury	cambury	cambury	cambury	cambury	cambury	cambury	cambury	cambury	cambury	fazenda	fazenda	fazenda	fazenda	fazenda	fazenda	fazenda	fazenda
informant	Alcides Jorge	Cremilda_da_Cruz_Catarina	Domingos	Eliete	Euclides_jr	Isac	José	Maximiano	Moises Firmino	Oziel Soares	Cirillio	Dn_Aparecida	Dn_Maria	Dn_onofria	Luciana_vieira	Maria_aparecida_vieira	Jose_vieira	vinturante_manoel
Achillea millefolium L.	0	1	0	0	0	0	0	0	0	0	0	0	0	0	0	0	0	0
Achyrocline flaccida(Weinm.) DC.	0	0	0	0	0	0	0	0	0	0	0	0	0	0	0	0	0	0
Aegiphila integrifolia (Jacq.) Moldenke	0	0	0	0	0	0	0	0	0	0	0	0	0	0	0	0	0	0
Ageratum conyzoides L.	0	0	0	0	0	0	0	0	0	0	0	0	0	0	0	0	0	0
Alternanthera brasiliana (L.) Kuntze	0	0	0	0	0	0	0	0	0	0	0	0	0	0	0	0	0	0
Amaranthus blitum L.	0	0	0	0	0	0	0	0	0	0	0	1	0	0	0	0	0	0
Anacardium occidentale L.	0	0	0	0	0	0	0	0	0	0	1	0	1	0	0	0	0	0
Aniba sp.	0	0	0	0	0	0	0	0	0	0	0	0	0	0	0	0	0	0
Annona dolabripetala Raddi	0	0	0	0	0	0	0	0	0	0	1	0	0	0	0	0	0	0
Annona muricata L.	0	0	0	0	0	0	0	0	0	0	1	0	0	0	0	0	0	0
Artocarpus altilis (Parkinson) Fosberg	0	0	0	0	0	0	0	0	0	0	1	0	0	0	0	0	0	0
Astrocaryum aculeatissimum (Schott) Burret	0	0	0	0	0	0	0	0	0	0	0	0	0	0	0	0	0	0
Baccharis sp. [Sect. Caulopterae DC.]	0	0	0	0	0	0	0	0	0	0	0	0	1	0	0	0	0	0
Bactris gasipaes Kunth	0	0	0	0	0	0	0	0	0	0	1	0	0	0	0	0	0	0
Bambusa cf. vulgaris Schrad. ex J.C.Wendl.	0	0	0	0	0	0	0	0	0	0	0	0	0	0	0	0	0	0
Bambusa sp.	0	0	0	0	0	0	0	0	0	0	0	0	0	0	0	0	0	0
Bathysa mendoncaei K.Schum.	0	0	0	0	0	0	0	0	0	0	0	0	0	0	0	0	0	0
Bidens pilosa L.	0	0	0	0	0	0	0	0	0	0	0	0	0	0	0	0	0	0
Bixa orellana L.	1	0	0	0	0	0	0	0	0	0	0	0	0	0	0	0	0	0
Brassica oleracea L. [Gr. Acephala]	0	0	0	0	0	0	0	0	0	0	0	0	0	0	1	0	0	0
Buchena viakleinii Exell	0	0	0	0	0	0	0	0	0	0	0	0	0	0	0	0	0	0
Bunchosia glandulifera (Jacq.) Kunth	0	0	0	0	0	0	0	0	0	0	1	0	0	0	0	1	0	0
Campomanesia phaea (O.Berg) Landrum	0	0	0	0	0	0	0	1	0	0	1	0	0	1	0	0	0	0
Capsicum sp.	0	0	0	0	0	0	0	0	0	0	0	0	0	1	0	0	0	0
Cecropia cf. pachystachya Trécul	0	0	0	0	0	0	0	0	0	0	0	0	0	0	0	0	0	0
Cecropia glaziovii Snethl.	0	0	0	0	0	0	0	0	0	0	1	0	0	0	0	0	0	0
Cecropia pachystachya Trécul	0	0	0	0	0	0	0	0	0	0	1	0	0	0	0	0	0	0
Cedrela fissilis Vell.	0	0	0	0	0	0	0	0	0	0	0	0	0	0	0	0	0	0
cf. Bathysa	0	0	0	0	0	0	0	0	0	0	0	0	0	0	0	0	0	0
cf. Furcraea foetida (L.) Haw.	0	0	0	0	0	0	0	0	0	0	0	0	0	0	0	0	0	0
cf. Pterocarpus rohrii Vahl	0	0	0	0	0	0	0	0	0	0	0	0	0	0	0	0	0	0
cf. Thoracocarpus bissectus (Vell.) Harling	0	0	0	0	0	0	0	0	0	0	0	0	0	0	0	0	0	0
Cichorium cf. intybus L.	0	0	0	0	0	0	0	0	0	0	0	0	0	0	1	0	0	0
Citrus reticulata Blanco	0	0	0	0	0	0	0	0	0	0	1	0	0	0	0	0	0	0
Citrus x limon (L.) Osbeck	0	0	0	1	0	0	0	0	0	0	0	0	0	0	0	0	0	0
Clidemia hirta (L.) D.Don	0	0	0	0	0	0	1	0	0	0	0	0	0	0	1	0	0	0
Coffea arabica L.	0	0	0	0	0	0	0	1	0	1	1	0	0	0	0	1	0	0
Colocasia esculenta (L.) Schott	0	0	0	0	0	0	0	0	0	0	0	0	0	1	1	1	0	0
Conyza cf. bonariensis (L.) Cronquist	0	0	0	0	0	0	0	0	0	0	0	0	0	0	0	0	0	0
Cordia sellowiana Cham.	0	0	0	0	0	0	0	0	0	0	0	0	0	0	0	0	0	0
Cordia sp.	0	0	0	0	0	0	0	0	0	0	0	0	0	0	0	0	0	0
Costus arabicus L.	0	0	0	0	0	0	0	0	0	0	0	0	0	0	0	0	0	0
Cryptocarya mandioccana Meisn.	0	0	0	0	0	0	0	0	0	1	1	0	0	1	0	0	0	0
Cryptocarya saligna Mez	0	0	0	0	0	0	0	0	0	0	1	0	0	0	0	0	0	0
Cupania oblongifolia Mart.	0	0	0	0	0	0	0	0	0	0	0	0	0	0	0	0	0	0
Cuphea carthagenensis (Jacq.) J.F.Macbr.	0	0	0	0	0	0	0	0	0	0	0	0	0	0	0	0	0	0
Curcuma longa L.	0	0	0	0	0	0	0	0	0	0	0	0	0	1	0	0	0	0
Cymbopogon citratus (DC.) Stapf	0	0	0	0	0	0	0	0	0	0	0	0	0	0	1	0	0	0
Cymbopogon nardus (L.)Rendle	0	0	0	0	0	0	0	0	0	0	0	0	0	0	0	0	0	0
Davilla rugosa Poir.	0	0	0	0	0	0	0	0	0	0	0	0	0	0	0	0	0	0
Dioscorea bulbifera L.	0	0	0	0	0	0	0	0	0	0	0	0	0	0	0	0	0	0
Dysphania ambrosioides (L.) Mosyakin & Clemants	0	0	0	0	0	0	0	0	0	0	0	0	0	0	0	0	0	0
Echinodorus grandiflorus (Cham. & Schltdl.) Micheli	0	0	0	0	0	0	0	0	0	0	0	0	0	0	0	0	0	0
Elaeocarpus cf. serratus L.	1	0	0	0	0	0	0	0	0	0	0	0	0	0	0	0	0	0
Emilia sonchifolia (L.) DC.	0	0	0	0	0	0	0	0	0	0	0	1	0	0	0	0	1	0
Erechtites valerianifolius (Wolf) DC.	1	0	0	0	0	0	0	0	0	0	0	1	0	0	0	0	1	0
Eryngium cf. coronatum Hook. & Arn.	0	1	0	0	0	0	0	0	0	0	0	0	0	0	0	0	0	0
Eryngium foetidum L	0	1	1	0	0	0	0	1	0	0	1	0	0	1	1	0	0	0
Erythroxylum pulchrum A.St.-Hil.	0	0	0	0	0	0	0	0	0	0	0	0	0	0	0	0	0	0
Eugenia astringens Cambess.	0	0	0	0	0	0	0	0	0	0	0	0	0	0	0	0	0	0
Eugenia brasiliensis Lam.	0	0	0	0	0	0	0	0	0	0	1	0	0	0	0	0	0	0
Eugenia cf. stipitata McVaugh	0	0	0	0	0	0	0	0	0	0	1	0	0	0	0	0	0	1
Eugenia uniflora L.	0	0	0	0	1	0	0	0	1	0	0	0	1	0	0	0	0	0
Euterpe edulis Mart.	0	0	0	1	0	0	1	1	1	1	0	1	0	0	0	0	0	0
Euterpe oleracea Mart.	0	0	0	0	0	0	0	0	0	0	1	0	0	0	0	0	0	0
Faramea hymenocalyx M.Gomes	0	0	0	0	0	0	0	0	0	0	0	0	0	0	0	0	0	0
Ficus adhatodifolia Schott	0	0	0	0	0	0	0	0	0	0	0	0	0	0	0	0	0	0
Foeniculum vulgare Mill.	0	0	0	0	0	0	0	0	0	0	0	0	0	0	0	1	0	0
Furcraea foetida (L.) Haw. [cf.]	0	0	0	0	0	0	0	0	0	0	0	0	0	0	0	0	0	0
Garcinia gardneriana (Planch. & Triana) Zappi	0	0	0	0	0	0	1	1	0	1	0	0	0	0	0	0	0	0
Geonoma elegans Mart.	0	0	0	0	0	0	0	0	0	0	0	0	0	0	0	0	0	0
Gossypium sp.	0	0	0	0	0	0	0	0	0	0	0	0	0	0	0	0	0	0
Guarea macrophylla Vahl	0	0	0	0	0	0	0	0	0	0	0	0	0	0	0	0	0	0
Guatteria australis A.St.-Hil.	0	0	0	0	0	0	0	0	0	0	0	0	0	0	0	0	0	0
Gymnanthemum amygdalinum (Delile) Sch.Bip. ex Walp.	0	0	0	0	0	0	0	0	0	0	0	0	0	0	0	0	0	0
Handroanthus albus (Cham.) Mattos	0	0	0	0	0	0	0	0	0	0	0	0	0	0	0	0	0	0
Hedychium coronarium J.Koenig	0	0	0	0	0	0	0	0	0	0	0	0	0	0	0	0	0	0
Huberia ovalifolia DC	0	0	0	0	0	0	0	0	0	0	0	0	0	0	0	0	0	0
Hyeronima alchorneoides Allemão	0	0	0	0	0	0	0	0	0	0	0	0	0	0	0	0	0	0
Hymenaea altissima Ducke	1	0	0	0	0	0	0	0	0	0	1	0	0	0	0	0	0	0
Hypochaeris chillensis (Kunth) Britton	0	0	0	0	0	0	0	0	0	0	0	0	0	0	1	0	0	0
Imperata sp.	0	0	0	0	0	0	0	0	0	0	0	0	0	0	0	0	0	0
Inga edulis Mart.	0	0	0	0	0	0	0	0	0	0	1	0	0	0	0	0	0	0
Inga marginata Willd.	0	0	0	0	0	0	0	1	0	0	0	0	0	0	0	0	0	1
Ipomoea batatas (L.) Lam.	1	0	0	1	0	0	0	0	0	0	0	0	0	0	0	0	0	0
Jacaranda puberula Cham.	0	0	0	0	0	0	0	1	0	0	0	0	0	0	0	0	0	0
Justicia pectoralis Jacq.	0	0	0	0	0	0	0	0	0	0	0	0	0	0	0	0	0	0
Lacistema lucidum Schnizl	0	0	0	0	0	0	0	0	0	0	0	0	0	0	0	0	0	0
Lactuca indica L.	0	0	0	0	0	0	0	0	0	0	0	0	0	1	1	0	0	0
Lippia alba (Mill.) N.E.Br. ex P.Wilson	0	0	0	0	0	0	0	0	0	0	0	0	0	0	0	0	0	0
Mabea piriri Aubl.	0	0	0	0	0	0	0	0	0	1	0	0	0	0	0	0	0	0
Manihot esculenta Crantz	0	0	0	0	0	0	0	1	0	0	0	0	0	0	0	0	0	0
Mentha sp.	0	0	0	0	0	0	0	0	0	0	0	1	0	1	0	0	0	0
Miconia cinnamomifolia (DC.) Naudin	0	0	0	0	0	0	0	0	0	0	0	0	0	0	0	0	0	0
Mikania laevigata Sch.Bip. ex Baker	0	0	0	0	0	0	0	0	0	0	0	0	0	0	0	0	0	0
Morus nigra L.	0	0	0	0	1	0	0	1	0	1	1	0	0	0	0	0	0	0
Myrcia neoriedeliana E.Lucas & C.E.Wilson	0	0	0	0	0	0	0	0	0	0	0	0	0	0	0	0	0	1
Myrcia spectabilis DC.	1	0	0	0	0	0	0	0	0	0	0	0	0	0	0	0	0	0
Myrciaria glazioviana (Kiaersk.) G.M.Barroso ex Sobral	0	0	0	0	0	0	0	1	0	0	1	0	0	0	1	1	0	0
Myrocarpus frondosus Allemão	0	0	0	0	0	0	0	0	0	0	0	0	0	0	0	0	0	0
Myrsine coriacea (Sw.) R.Br. ex Roem. & Schult.	0	0	0	0	0	0	0	0	0	0	0	0	0	0	0	0	0	0
Ocimum americanum L.	0	1	0	0	0	0	0	0	0	0	0	0	0	0	1	0	0	0
Ocimum campechianum Mill.	0	1	0	0	0	0	0	1	0	0	0	0	0	1	0	0	0	0
Ocimum gratissimum L.	0	1	0	0	0	0	0	0	0	0	0	0	0	1	0	0	0	0
Pachira glabra Pasq.	0	0	0	0	0	0	0	0	0	0	1	0	0	0	0	0	0	0
Pera glabrata (Schott) Poepp. ex Baill.	0	0	0	0	0	0	0	0	0	0	0	0	0	0	0	0	0	0
Pfaffia glomerata (Spreng.) Pedersen	0	0	0	0	0	0	0	0	0	0	0	0	0	0	0	0	0	0
Philodendron eximium Schott	0	0	0	0	0	0	0	0	0	0	0	0	0	0	0	0	0	0
Philodendron martianum Engl.	0	0	0	0	0	0	0	0	0	0	0	0	0	0	0	0	0	0
Phyllanthus niruri L.	0	0	0	0	0	0	0	0	0	0	0	0	0	0	0	0	0	0
Piper mollicomum Kunth	0	0	0	0	0	0	0	0	0	0	0	0	0	0	0	0	0	0
Piper scutifolium Yunck	0	0	0	0	0	0	0	0	0	0	0	0	0	0	0	0	0	0
Piptadenia gonoacantha (Mart.) J.F.Macbr.	0	0	0	0	0	0	0	0	0	0	0	0	0	0	0	0	0	0
Plantago australis Lam.	1	0	0	0	0	0	0	0	0	0	0	0	0	1	0	0	0	0
Plectranthus amboinicus (Lour.) Spreng.	0	0	0	0	0	0	0	0	0	0	0	0	0	1	0	0	0	0
Plectranthus barbatus Andrews	0	0	0	0	0	0	0	0	0	0	0	0	0	0	0	0	0	0
Plinia edulis (Vell.) Sobral	0	0	0	0	0	0	1	0	0	1	1	0	0	0	0	0	0	0
Polygala paniculata L.	0	0	0	0	0	0	0	0	0	0	0	0	0	0	0	0	0	0
Pouteria caimito (Ruiz & Pav.) Radlk.	0	0	0	0	0	0	0	0	0	0	0	0	0	0	0	1	0	0
Psidium cattleianum Sabine	0	0	0	0	0	0	1	0	0	0	0	0	1	0	0	0	0	0
Psidium guajava L.	1	1	0	0	0	0	1	0	0	0	0	0	0	0	1	0	0	0
Renealmia petasites Gagnep.	0	0	0	0	0	0	0	0	0	0	0	0	0	0	0	0	0	0
Ricinus communis L.	0	0	0	0	0	0	0	0	0	0	0	0	0	0	0	0	0	0
Rubus rosifolius Sm.	0	0	0	0	0	0	0	1	0	0	1	0	0	0	0	0	0	0
Rustia formosa (Cham. & Schltdl.) Klotzsch	0	0	0	0	0	0	0	0	0	0	0	0	0	0	0	0	0	0
Schinus terebinthifoliaRaddi	0	0	0	0	0	0	0	0	0	0	0	1	0	0	0	0	0	0
Schizolobium parahyba (Vell.) S.F.Blake	0	0	0	0	0	0	0	0	0	0	0	0	0	0	0	0	0	0
Sida planicaulis Cav.	0	0	0	0	0	0	0	0	0	0	0	0	0	0	0	0	0	0
Sida rhombifolia L.	0	0	0	0	0	0	0	0	0	0	0	0	0	0	0	0	0	0
Solanum americanum Mill.	0	0	0	0	0	0	0	0	0	0	1	1	0	0	0	0	0	0
Solanum capsicoides All.	0	0	0	0	0	0	0	0	0	0	0	0	0	0	0	0	0	0
Solanum pseudoquina A.St.-Hil.	0	0	0	0	0	0	1	0	0	0	0	0	0	0	0	0	0	0
Sorocea cf. guilleminiana Gaudich.	0	0	0	0	0	0	0	0	0	0	0	0	0	0	0	0	0	0
sp. 2 - Myrtaceae	0	0	0	0	0	0	0	0	0	0	0	0	0	0	0	0	0	0
Stachytarpheta cayennensis (Rich.) Vahl	0	0	0	0	0	0	0	0	0	0	0	0	0	0	0	0	0	0
Swartzia oblata R.S.Cowan	0	0	0	0	0	0	0	0	0	1	0	0	0	0	0	0	0	0
Swartzia simplex var. grandiflora (Raddi) R.S.Cowan	0	0	0	0	0	0	0	0	0	0	0	0	0	0	0	0	0	0
Syagrus pseudococos (Raddi) Glassman	0	0	0	0	0	0	0	0	0	0	1	1	0	0	0	0	0	1
Syzygium jambos (L.) Alston	0	0	0	0	0	0	0	0	0	0	1	0	0	0	0	0	0	0
Syzygium malaccense (L.) Merr. & L.M.Perry	0	0	0	0	0	0	0	0	0	1	1	0	0	0	0	0	0	0
Tabernaemontana laeta Mart.	0	0	0	0	0	0	0	0	0	0	0	0	0	0	0	0	0	0
Theobroma cacao L.	0	0	0	0	0	0	0	1	0	1	1	0	0	0	0	0	0	0
Typha domingensis Pers.	0	0	0	0	0	0	0	0	0	0	0	0	0	0	0	0	0	0
Urera baccifera (L.) Gaudich. ex Wedd.	0	0	0	0	0	0	0	0	0	0	0	0	0	1	0	0	0	0
Varronia curassavica Jacq.	0	0	0	0	0	0	0	0	0	0	0	0	0	0	0	0	0	0
Vernonanthura beyrichii (Less.) H.Rob.	0	0	0	0	0	0	0	0	0	0	0	0	0	0	0	0	0	0
Xanthosoma taioba E.G.Gonç.	0	0	0	1	0	0	0	0	0	0	1	1	0	1	0	0	0	0
Zanthoxylum rhoifolium Lam.	0	0	0	0	0	0	0	0	0	0	0	0	0	0	0	0	0	0
Aleurites moluccanus (L.) Willd	0	0	0	0	0	0	0	0	0	1	0	0	0	0	0	0	0	0
Allium chinense G. Don	0	1	0	0	0	0	0	0	0	0	0	0	0	0	0	0	0	0
Allium fistulosum L.	0	1	0	0	0	0	0	0	0	0	0	0	0	0	0	0	0	0
Allium tuberosum	0	1	1	0	0	0	0	0	0	0	0	0	0	0	0	0	0	0
Annona montana Macf.	0	0	0	0	0	0	1	0	0	0	0	0	0	0	0	0	0	0
Artocarpus heterophyllus Lam	0	0	0	0	0	1	0	0	0	0	0	0	0	0	0	0	0	0
Astrocaryum aculeatissimum (Schott) Burret	0	0	0	0	0	0	0	0	0	1	0	0	0	0	0	0	0	0
Bactris sp.	0	0	0	0	0	0	0	0	0	1	0	0	0	0	0	0	0	0
Cajanus cajan (L.) Huth	1	0	0	0	0	0	0	1	0	0	0	0	0	0	0		0	0
Citharexylum myrianthum Cham.	0	0	0	0	0	0	0	0	0	1	0	0	0	0	0	0	0	0
Citrus sinensis (L.) Osbeck	0	0	0	0	0	0	1	0	0	0	0	0	0	0	0	0	0	0
Dioscorea sp.	0	0	0	0	0	0	0	1	0	0	0	0	0	0	0	0	0	0
Ecclinusa ramiflora Mart.	0	0	0	1	0	0	1	0	0	0		0	0	0	0	0	0	0
Elephantopus mollis Kunth	0	0	0	0	0	0	0	0	1	0	0	0	0	0	0	0	0	0
Eugenia cf. multicostata D. Legrand	0	0	0	0	0	1	0	0	0	1	0	0	0	0	0	0	0	0
Eugenia sp.	0	0	0	0	0	0	0	0	0	1		0	0	0	0	0	0	0
Eugenia sulcata Spring ex Mart.	0	0	0	0	0	0	0	1	0	0	0	0	0	0	0	0	0	0
Inga cf. lenticellata Benth.	0	0	0	0	0	0	0	0	0	1	0	0	0	0	0	0	0	0
Jacaratia spinosa (Aubl.) A.DC.	0	0	0	0	0	0	1	0	0	0	0	0	0	0	0	0	0	0
Licania sp.2	0	0	0	0	0	0	0	0	0	1	0	0	0	0	0	0	0	0
Marantaceae sp.2	0	0	0	0	0	0	0	1	0	0	0	0	0	0	0		0	0
Miconia dodecandra Cogn.	1	0	0	0	0	0	0	0	0	0	0	0	0	0	0	0	0	0
Miconia prasina (Sw.) DC.	0	0	0	0	0	0	0	1	0	0	0	0	0	0	0	0	0	0
Micropholis crassipedicellata (Mart. & Eichler) Pierre	0	0	0	0	0	0	1	0	0	1	0	0	0	0	0	0	0	0
Mimusops coriacea (A.DC.) Miq.	0	0	0	0	0	0	1	0	0	0	0	0	0	0	0	0	0	0
Musa sp.	1	0	0	0	0	0	0	0	0	0	0	0	0	0	0	0	0	0
Nectandra oppositifolia Nees	0	0	0	0	0	0	0	0	0	1	0	0	0	0	0	0	0	0
Passiflora miersii Mast.	0	0	0	0	0	0	0	0	0	1	0	0	0	0	0	0	0	0
Persea americana Mill.	0	0	0	0	0	0	1	0	0	0	0	0	0	0	0	0	0	0
Phaseolus vulgaris L.	1	0	0	0	0	0	0	0	0	0	0	0	0	0	0	0	0	0
Plinia sp.	0	0	0	0	0	0	1	0	0	1	0	0	0	0	0	0	0	0
Rubus urticifolius Poir.	0	0	0	0	0	0	0	1	0	1	0	0	0	0	0	0	0	0
Solanum scuticum M.Nee	0	0	0	0	0	0	0	0	1	1	0	0	0	0	0	0	0	0
Tetrorchidium sp.	0	0	0	0	0	0	0	0	0	1	0	0	0	0	0	0	0	0
Trichilia silvatica C.DC.	0	0	0	0	0	0	0	0	0	1	0	0	0	0	0	0	0	0
Urera nitida (Vell.) P.Brack	0	0	0	1	0	0	0	0	0	1	0	0	0	0	0	0	0	0
Actinostemon verticillatus (Klotzsch) Baill.	0	0	0	0	0	0	0	0	0	0	0	0	0	0	0	0	0	0
Andira fraxinifolia Benth.	0	0	0	0	0	0	0	0	0	0	0	0	0	0	0	0	0	0
Brosimum guianense (Aubl.) Huber	0	0	0	0	0	0	0	0	0	0	0	0	0	0	0	0	0	0
Cabralea canjerana (Vell.) Mart.	0	0	0	0	0	0	0	0	0	0	0	0	0	0	0	0	0	0
Cariniana estrellensis (Raddi) Kuntze	0	0	0	0	0	0	0	0	0	0	0	0	0	0	0	0	0	0
cf. Hymenolobium janeirense Kuhlm.	0	0	0	0	0	0	0	0	0	0	0	0	0	0	0	0	0	0
Citharexylum myrianthum Cham.	0	0	0	0	0	0	0	0	0	0	0	0	0	0	0	0	0	0
Cordia sp.2	0	0	0	0	0	0	0	0	0	0	0	0	0	0	0	0	0	0
Eriotheca pentaphylla (Vell. & K.Schum.) A.Robyns	0	0	0	0	0	0	0	0	0	0	0	0	0	0	0	0	0	0
Geonoma sp.	0	0	0	0	0	0	0	0	0	0	0	0	0	0	0	0	0	0
Hedyosmum brasiliense Miq.	0	0	0	0	0	0	0	0	0	0	0	0	0	0	0	0	0	0
Inga sp	0	0	0	0	0	0	0	0	0	0	0	0	0	0	0	0	0	0
Pouteria sp.2	0	0	0	0	0	0	0	0	0	0	0	0	0	0	0	0	0	0
Schefflera cf. angustissima (Marchal) Frodin	0	0	0	0	0	0	0	0	0	0	0	0	0	0	0	0	0	0
Stylogyne lhotzkyana (A.DC.) Mez	0	0	0	0	0	0	0	0	0	0	0	0	0	0	0	0	0	0
Tachigali paratyensis (Vell.) H.C.Lima	0	0	0	0	0	0	0	0	0	0	0	0	0	0	0	0	0	0
Tachigali sp.1	0	0	0	0	0	0	0	0	0	0	0	0	0	0	0	0	0	0
Tachigali sp.2	0	0	0	0	0	0	0	0	0	0	0	0	0	0	0	0	0	0
Tibouchina pulchra Cogn.	0	0	0	0	0	0	0	0	0	0	0	0	0	0	0	0	0	0
Virola bicuhyba (Schott ex Spreng.) Warb.	0	0	0	0	0	0	0	0	0	0	0	0	0	0	0	0	0	0
Vitex polygama Cham.	0	0	0	0	0	0	0	0	0	0	0	0	0	0	0	0	0	0
Xylopia brasiliensis Spreng.	0	0	0	0	0	0	0	0	0	0	0	0	0	0	0	0	0	0
Cedrela cf. odorata L	0	0	0	0	0	0	0	0	0	0	0	0	0	0	0	0	0	0
Clusia criuva subsp. parviflora Vesque	0	0	0	0	0	0	0	0	0	0	0	0	0	0	0	0	0	0
Cordia sp.3	0	0	0	0	0	0	0	0	0	0	0	0	0	0	0	0	0	0
Ficus gomelleira Kunth & C.D.Bouché	0	0	0	0	0	0	0	0	0	0	0	0	0	0	0	0	0	0
Malouetia cestroides (Nees ex Mart.) Müll. Arg.	0	0	0	0	0	0	0	0	0	0	0	0	0	0	0	0	0	0
Pourouma guianensis Aubl.	0	0	0	0	0	0	0	0	0	0	0	0	0	0	0	0	0	0
Pouteria sp.1	0	0	0	0	0	0	0	0	0	0	0	0	0	0	0	0	0	0
Pseudopiptadenia leptostachya (Benth.) Rauschert	0	0	0	0	0	0	0	0	0	0	0	0	0	0	0	0	0	0
Tachigali sp.3	0	0	0	0	0	0	0	0	0	0	0	0	0	0	0	0	0	0
Borreria verticillata (L.) G.Mey.	0	0	0	0	0	0	0	0	0	0	0	0	0	0	0	0	0	0
Guapira nitida (Mart. ex J.A.Schmidt) Lundell	0	0	0	0	0	0	0	0	0	0	0	0	0	0	0	0	0	0
Maytenus ardisiaefolia Reissek	0	0	0	0	0	0	0	0	0	0	0	0	0	0	0	0	0	0
Merostachys argyronema Lindm.	0	0	0	0	0	0	0	0	0	0	0	0	0	0	0	0	0	0
Myrcia sp.2	0	0	0	0	0	0	0	0	0	0	0	0	0	0	0	0	0	0
Myrcia sp.3	0	0	0	0	0	0	0	0	0	0	0	0	0	0	0	0	0	0
Dalbergia frutescens (Vell.) Britton	0	0	0	0	0	0	0	0	0	0	0	0	0	0	0	0	0	0
Trema micranta (L.) Blume	0	0	0	0	0	0	0	0	0	0	0	0	0	0	0	0	0	0
Myrcia sp.1	0	0	0	0	0	0	0	0	0	0	0	0	0	0	0	0	0	0
Piper cernuum Vell.	0	0	0	0	0	0	0	0	0	0	0	0	0	0	0	0	0	0
Piper cf. gaudichaudianum Kunth	0	0	0	0	0	0	0	0	0	0	0	0	0	0	0	0	0	0
Canavalia ensiformis (L.) DC.	0	0	0	0	0	0	0	0	0	0	0	0	0	0	0	0	0	0
Ctenanthe lanceolata Petersen	0	0	0	0	0	0	0	0	0	0	0	0	0	0	0	0	0	0
Tephrosia candida (Roxb.) DC.	0	0	0	0	0	0	0	0	0	0	0	0	0	0	0	0	0	0
Cyrtocymura scorpioides (Lam.) H.Rob.	0	0	0	0	0	0	0	0	0	0	0	0	0	0	0	0	0	0
Achyrocline sp.1	0	0	0	0	0	0	0	0	0	0	0	0	0	0	0	0	0	0
Marantaceae sp.1	0	0	0	0	0	0	0	0	0	0	0	0	0	0	0	0	0	0
Aloysia gratissima (Gillies & Hook.) Tronc	0	0	0	0	0	0	0	0	0	0	0	0	0	0	0	0	0	0
Ruta graveolens L.	0	0	0	0	0	0	0	0	0	0	0	0	0	0	0	0	0	0
Sansevieria trifasciata Prain	0	0	0	0	0	0	0	0	0	0	0	0	0	0	0	0	0	0
Sansevieria trifasciata 'Laurentii	0	0	0	0	0	0	0	0	0	0	0	0	0	0	0	0	0	0
Petiveria alliacea L.	0	0	0	0	0	0	0	0	0	0	0	0	0	0	0	0	0	0
Tetradenia riparia (Hochst.) Codd	0	0	0	0	0	0	0	0	0	0	0	0	0	0	0	0	0	0
Gallesia integrifolia (Spreng.) Harms	0	0	0	0	0	0	0	0	0	0	0	0	0	0	0	0	0	0
Sambucus cf. canadensis	0	0	0	0	0	0	0	0	0	0	0	0	0	0	0	0	0	0
Scoparia dulcis L.	0	0	0	0	0	0	0	0	0	0	0	0	0	0	0	0	0	0

## Sheet: Construction
community	cambury	cambury	cambury	cambury	cambury	cambury	cambury	cambury	cambury	cambury	fazenda	fazenda	fazenda	fazenda	fazenda	fazenda	fazenda	fazenda
informant	Alcides Jorge	Cremilda_da_Cruz_Catarina	Domingos	Eliete	Euclides_jr	Isac	José	Maximiano	Moises Firmino	Oziel Soares	Cirillio	Dn_Aparecida	Dn_Maria	Dn_onofria	Luciana_vieira	Maria_aparecida_vieira	Jose_vieira	vinturante_manoel
Achillea millefolium L.	0	0	0	0	0	0	0	0	0	0	0	0	0	0	0	0	0	0
Achyrocline flaccida(Weinm.) DC.	0	0	0	0	0	0	0	0	0	0	0	0	0	0	0	0	0	0
Aegiphila integrifolia (Jacq.) Moldenke	0	0	0	0	0	0	0	0	0	0	0	0	0	0	0	0	0	0
Ageratum conyzoides L.	0	0	0	0	0	0	0	0	0	0	0	0	0	0	0	0	0	0
Alternanthera brasiliana (L.) Kuntze	0	0	0	0	0	0	0	0	0	0	0	0	0	0	0	0	0	0
Amaranthus blitum L.	0	0	0	0	0	0	0	0	0	0	0	0	0	0	0	0	0	0
Anacardium occidentale L.	0	0	0	0	0	0	0	0	0	0	0	0	0	0	0	0	0	0
Aniba sp.	0	0	0	0	0	0	1	0	0	0	1	0	0	0	0	0	1	0
Annona dolabripetala Raddi	0	0	0	0	0	0	0	0	0	0	0	0	0	0	0	0	0	0
Annona muricata L.	0	0	0	0	0	0	0	0	0	0	0	0	0	0	0	0	0	0
Artocarpus altilis (Parkinson) Fosberg	0	0	0	0	0	0	0	0	0	0	0	0	0	0	0	0	0	0
Astrocaryum aculeatissimum (Schott) Burret	0	0	0	0	0	0	0	0	0	0	0	0	0	0	0	0	0	0
Baccharis sp. [Sect. Caulopterae DC.]	0	0	0	0	0	0	0	0	0	0	0	0	0	0	0	0	0	0
Bactris gasipaes Kunth	0	0	0	0	0	0	0	0	0	0	0	0	0	0	0	0	0	0
Bambusa cf. vulgaris Schrad. ex J.C.Wendl.	0	0	0	0	0	0	0	0	0	0	0	1	0	0	0	0	0	0
Bambusa sp.	0	0	0	0	0	0	0	1	0	0	0	1	0	0	0	0	0	0
Bathysa mendoncaei K.Schum.	0	0	0	0	0	0	0	0	0	0	0	0	0	0	0	0	0	1
Bidens pilosa L.	0	0	0	0	0	0	0	0	0	0	0	0	0	0	0	0	0	0
Bixa orellana L.	0	0	0	0	0	0	0	0	0	0	0	0	0	0	0	0	0	0
Brassica oleracea L. [Gr. Acephala]	0	0	0	0	0	0	0	0	0	0	0	0	0	0	0	0	0	0
Buchena viakleinii Exell	0	0	0	0	0	0	0	0	0	0	0	0	0	0	0	0	0	0
Bunchosia glandulifera (Jacq.) Kunth	0	0	0	0	0	0	0	0	0	0	0	0	0	0	0	0	0	0
Campomanesia phaea (O.Berg) Landrum	0	0	0	0	0	0	0	1	0	1	0	0	0	0	0	0	0	0
Capsicum sp.	0	0	0	0	0	0	0	0	0	0	0	0	0	0	0	0	0	0
Cecropia cf. pachystachya Trécul	0	0	0	0	0	0	0	0	0	0	0	0	0	0	0	0	0	0
Cecropia glaziovii Snethl.	0	0	0	0	0	0	1	0	0	0	0	0	0	0	0	0	0	0
Cecropia pachystachya Trécul	0	0	0	0	0	0	0	0	0	0	0	0	0	0	0	0	0	0
Cedrela fissilis Vell.	0	0	0	0	0	0	0	0	0	0	1	0	0	0	0	0	0	0
cf. Bathysa	0	0	0	0	0	0	0	0	0	0	0	0	0	0	0	0	0	1
cf. Furcraea foetida (L.) Haw.	0	0	0	0	0	0	0	0	0	0	0	0	0	0	0	0	0	0
cf. Pterocarpus rohrii Vahl	0	0	0	0	0	0	0	0	0	0	1	0	0	0	0	0	0	1
cf. Thoracocarpus bissectus (Vell.) Harling	0	0	0	0	0	0	0	0	0	0	0	1	0	0	0	0	0	1
Cichorium cf. intybus L.	0	0	0	0	0	0	0	0	0	0	0	0	0	0	0	0	0	0
Citrus reticulata Blanco	0	0	0	0	0	0	0	0	0	0	0	0	0	0	0	0	0	0
Citrus x limon (L.) Osbeck	0	0	0	0	0	0	0	0	0	0	0	0	0	0	0	0	0	0
Clidemia hirta (L.) D.Don	0	0	0	0	0	0	0	0	0	0	0	0	0	0	0	0	0	0
Coffea arabica L.	0	0	0	0	0	0	0	0	0	0	0	0	0	0	0	0	0	0
Colocasia esculenta (L.) Schott	0	0	0	0	0	0	0	0	0	0	0	0	0	0	0	0	0	0
Conyza cf. bonariensis (L.) Cronquist	0	0	0	0	0	0	0	0	0	0	0	0	0	0	0	0	0	0
Cordia sellowiana Cham.	0	0	0	0	0	0	0	0	0	0	0	0	0	0	0	0	0	0
Cordia sp.	0	0	0	0	0	0	0	0	0	0	0	0	0	0	0	0	1	0
Costus arabicus L.	0	0	0	0	0	0	0	0	0	0	0	0	0	0	0	0	0	0
Cryptocarya mandioccana Meisn.	0	0	0	0	0	0	0	0	0	0	0	0	0	0	0	0	0	0
Cryptocarya saligna Mez	0	0	0	0	0	0	0	0	0	0	0	0	0	0	0	0	1	1
Cupania oblongifolia Mart.	0	0	0	0	0	0	0	0	0	1	1	0	0	0	0	0	0	0
Cuphea carthagenensis (Jacq.) J.F.Macbr.	0	0	0	0	0	0	0	0	0	0	0	0	0	0	0	0	0	0
Curcuma longa L.	0	0	0	0	0	0	0	0	0	0	0	0	0	0	0	0	0	0
Cymbopogon citratus (DC.) Stapf	0	0	0	0	0	0	0	0	0	0	0	0	0	0	0	0	0	0
Cymbopogon nardus (L.)Rendle	0	0	0	0	0	0	0	0	0	0	0	0	0	0	0	0	0	0
Davilla rugosa Poir.	0	0	0	0	0	0	0	0	0	0	0	0	0	0	0	0	0	0
Dioscorea bulbifera L.	0	0	0	0	0	0	0	0	0	0	0	0	0	0	0	0	0	0
Dysphania ambrosioides (L.) Mosyakin & Clemants	0	0	0	0	0	0	0	0	0	0	0	0	0	0	0	0	0	0
Echinodorus grandiflorus (Cham. & Schltdl.) Micheli	0	0	0	0	0	0	0	0	0	0	0	0	0	0	0	0	0	0
Elaeocarpus cf. serratus L.	0	0	0	0	0	0	0	0	0	0	0	0	0	0	0	0	0	0
Emilia sonchifolia (L.) DC.	0	0	0	0	0	0	0	0	0	0	0	0	0	0	0	0	0	0
Erechtites valerianifolius (Wolf) DC.	0	0	0	0	0	0	0	0	0	0	0	0	0	0	0	0	0	0
Eryngium cf. coronatum Hook. & Arn.	0	0	0	0	0	0	0	0	0	0	0	0	0	0	0	0	0	0
Eryngium foetidum L	0	0	0	0	0	0	0	0	0	0	0	0	0	0	0	0	0	0
Erythroxylum pulchrum A.St.-Hil.	0	0	0	0	0	0	0	0	0	0	1	0	0	0	0	0	0	0
Eugenia astringens Cambess.	0	0	0	0	0	0	0	0	0	0	0	0	0	0	0	0	0	0
Eugenia brasiliensis Lam.	0	0	0	0	0	0	0	0	0	0	0	0	0	0	0	0	0	0
Eugenia cf. stipitata McVaugh	0	0	0	0	0	0	0	0	0	0	0	0	0	0	0	0	0	1
Eugenia uniflora L.	0	0	0	0	0	0	0	0	0	0	0	0	0	0	0	0	0	0
Euterpe edulis Mart.	0	0	0	0	0	0	0	0	0	0	0	1	0	0	0	0	0	0
Euterpe oleracea Mart.	0	0	0	0	0	0	0	0	0	0	0	0	0	0	0	0	0	0
Faramea hymenocalyx M.Gomes	0	0	0	0	0	0	0	0	0	0	0	0	0	0	0	0	0	0
Ficus adhatodifolia Schott	0	0	0	0	0	0	0	0	0	0	0	0	0	0	0	0	0	0
Foeniculum vulgare Mill.	0	0	0	0	0	0	0	0	0	0	0	0	0	0	0	0	0	0
Furcraea foetida (L.) Haw. [cf.]	0	0	0	0	0	0	0	0	0	0	0	0	0	0	0	0	0	0
Garcinia gardneriana (Planch. & Triana) Zappi	0	0	0	0	0	0	0	0	0	0	0	0	0	0	0	0	0	1
Geonoma elegans Mart.	0	0	0	0	0	0	0	0	0	0	0	1	0	0	0	0	0	1
Gossypium sp.	0	0	0	0	0	0	0	0	0	0	0	0	0	0	0	0	0	0
Guarea macrophylla Vahl	0	0	0	0	0	0	0	0	0	0	0	0	0	0	0	0	0	0
Guatteria australis A.St.-Hil.	0	0	0	0	0	0	0	0	0	0	0	0	0	0	0	0	0	0
Gymnanthemum amygdalinum (Delile) Sch.Bip. ex Walp.	0	0	0	0	0	0	0	0	0	0	0	0	0	0	0	0	0	0
Handroanthus albus (Cham.) Mattos	0	0	0	0	0	0	0	0	0	1	0	0	0	0	0	0	0	0
Hedychium coronarium J.Koenig	0	0	0	0	0	0	0	0	0	0	0	0	0	0	0	0	0	0
Huberia ovalifolia DC	0	0	0	0	0	0	0	0	0	0	0	0	0	0	0	0	0	0
Hyeronima alchorneoides Allemão	0	0	0	0	0	0	0	0	0	1	1	1	0	0	0	0	0	1
Hymenaea altissima Ducke	0	0	0	0	0	0	0	0	0	0	0	0	0	0	0	0	0	0
Hypochaeris chillensis (Kunth) Britton	0	0	0	0	0	0	0	0	0	0	0	0	0	0	0	0	0	0
Imperata sp.	0	0	0	0	0	0	0	0	0	0	0	1	0	0	0	0	0	0
Inga edulis Mart.	0	0	0	0	0	0	0	0	0	0	0	0	0	0	0	0	0	0
Inga marginata Willd.	0	0	0	0	0	0	0	0	0	0	0	0	0	0	0	0	0	0
Ipomoea batatas (L.) Lam.	0	0	0	0	0	0	0	0	0	0	0	0	0	0	0	0	0	0
Jacaranda puberula Cham.	0	0	0	0	0	0	0	0	0	1	0	0	0	0	0	0	0	0
Justicia pectoralis Jacq.	0	0	0	0	0	0	0	0	0	0	0	0	0	0	0	0	0	0
Lacistema lucidum Schnizl	0	0	0	0	0	0	0	1	0	1	1	0	0	0	0	0	0	0
Lactuca indica L.	0	0	0	0	0	0	0	0	0	0	0	0	0	0	0	0	0	0
Lippia alba (Mill.) N.E.Br. ex P.Wilson	0	0	0	0	0	0	0	0	0	0	0	0	0	0	0	0	0	0
Mabea piriri Aubl.	0	0	0	0	0	0	1	1	0	1	0	0	0	0	0	0	1	1
Manihot esculenta Crantz	0	0	0	0	0	0	0	0	0	0	0	0	0	0	0	0	0	0
Mentha sp.	0	0	0	0	0	0	0	0	0	0	0	0	0	0	0	0	0	0
Miconia cinnamomifolia (DC.) Naudin	0	0	0	0	0	0	0	0	0	1	1	1	0	0	0	0	0	0
Mikania laevigata Sch.Bip. ex Baker	0	0	0	0	0	0	0	0	0	0	0	0	0	0	0	0	0	0
Morus nigra L.	0	0	0	0	0	0	0	0	0	0	0	0	0	0	0	0	0	0
Myrcia neoriedeliana E.Lucas & C.E.Wilson	0	0	0	0	0	0	0	0	0	0	0	0	0	0	0	0	0	0
Myrcia spectabilis DC.	0	0	0	0	0	0	0	0	0	0	1	0	0	0	0	0	0	1
Myrciaria glazioviana (Kiaersk.) G.M.Barroso ex Sobral	0	0	0	0	0	0	0	0	0	0	0	0	0	0	0	0	0	0
Myrocarpus frondosus Allemão	0	0	0	0	0	0	0	0	0	0	0	0	0	0	0	0	1	0
Myrsine coriacea (Sw.) R.Br. ex Roem. & Schult.	0	0	0	0	0	0	1	0	0	1	1	0	0	0	0	0	0	0
Ocimum americanum L.	0	0	0	0	0	0	0	0	0	0	0	0	0	0	0	0	0	0
Ocimum campechianum Mill.	0	0	0	0	0	0	0	0	0	0	0	0	0	0	0	0	0	0
Ocimum gratissimum L.	0	0	0	0	0	0	0	0	0	0	0	0	0	0	0	0	0	0
Pachira glabra Pasq.	0	0	0	0	0	0	0	0	0	0	0	0	0	0	0	0	0	0
Pera glabrata (Schott) Poepp. ex Baill.	0	0	0	0	0	0	0	0	0	0	0	0	0	0	0	0	1	0
Pfaffia glomerata (Spreng.) Pedersen	0	0	0	0	0	0	0	0	0	0	0	0	0	0	0	0	0	0
Philodendron eximium Schott	0	0	0	0	0	0	0	0	0	0	0	1	0	0	0	0	0	0
Philodendron martianum Engl.	0	0	0	0	0	0	0	0	0	0	0	0	0	0	0	0	0	0
Phyllanthus niruri L.	0	0	0	0	0	0	0	0	0	0	0	0	0	0	0	0	0	0
Piper mollicomum Kunth	0	0	0	0	0	0	0	0	0	0	0	0	0	0	0	0	0	0
Piper scutifolium Yunck	0	0	0	0	0	0	0	0	0	0	0	0	0	0	0	0	0	0
Piptadenia gonoacantha (Mart.) J.F.Macbr.	0	0	0	0	0	0	0	0	0	0	0	1	0	0	0	0	1	0
Plantago australis Lam.	0	0	0	0	0	0	0	0	0	0	0	0	0	0	0	0	0	0
Plectranthus amboinicus (Lour.) Spreng.	0	0	0	0	0	0	0	0	0	0	0	0	0	0	0	0	0	0
Plectranthus barbatus Andrews	0	0	0	0	0	0	0	0	0	0	0	0	0	0	0	0	0	0
Plinia edulis (Vell.) Sobral	0	0	0	0	0	0	0	0	0	0	0	0	0	0	0	0	0	0
Polygala paniculata L.	0	0	0	0	0	0	0	0	0	0	0	0	0	0	0	0	0	0
Pouteria caimito (Ruiz & Pav.) Radlk.	0	0	0	0	0	0	0	0	0	0	0	0	0	0	0	0	1	0
Psidium cattleianum Sabine	0	0	0	0	0	0	0	0	0	0	0	0	0	0	0	0	0	0
Psidium guajava L.	0	0	0	0	0	0	0	0	0	0	0	0	0	0	0	0	0	0
Renealmia petasites Gagnep.	0	0	0	0	0	0	0	0	0	0	0	0	0	0	0	0	0	0
Ricinus communis L.	0	0	0	0	0	0	0	0	0	0	0	0	0	0	0	0	0	0
Rubus rosifolius Sm.	0	0	0	0	0	0	0	0	0	0	0	0	0	0	0	0	0	0
Rustia formosa (Cham. & Schltdl.) Klotzsch	0	0	0	0	0	0	0	0	0	1	0	0	0	0	0	0	0	0
Schinus terebinthifoliaRaddi	0	0	0	0	0	0	0	0	0	0	0	0	0	0	0	0	0	0
Schizolobium parahyba (Vell.) S.F.Blake	0	0	0	0	0	0	0	0	0	0	0	0	0	0	0	0	0	0
Sida planicaulis Cav.	0	0	0	0	0	0	0	0	0	0	0	0	0	0	0	0	0	0
Sida rhombifolia L.	0	0	0	0	0	0	0	0	0	0	0	0	0	0	0	0	0	0
Solanum americanum Mill.	0	0	0	0	0	0	0	0	0	0	0	0	0	0	0	0	0	0
Solanum capsicoides All.	0	0	0	0	0	0	0	0	0	0	0	0	0	0	0	0	0	0
Solanum pseudoquina A.St.-Hil.	0	0	0	0	0	0	0	0	0	0	0	0	0	0	0	0	0	0
Sorocea cf. guilleminiana Gaudich.	0	0	0	0	0	0	0	0	0	1	1	0	0	0	0	0	0	0
sp. 2 - Myrtaceae	0	0	0	0	0	0	0	0	0	0	0	0	0	0	0	0	0	1
Stachytarpheta cayennensis (Rich.) Vahl	0	0	0	0	0	0	0	0	0	0	0	0	0	0	0	0	0	0
Swartzia oblata R.S.Cowan	0	0	0	0	0	0	0	0	0	0	0	0	0	0	0	0	0	0
Swartzia simplex var. grandiflora (Raddi) R.S.Cowan	0	0	0	0	0	0	0	0	0	1	0	0	0	0	0	0	1	1
Syagrus pseudococos (Raddi) Glassman	0	0	0	0	0	0	0	0	0	0	1	1	0	0	0	0	0	0
Syzygium jambos (L.) Alston	0	0	0	0	0	0	0	0	0	0	0	0	0	0	0	0	0	0
Syzygium malaccense (L.) Merr. & L.M.Perry	0	0	0	0	0	0	0	0	0	0	0	0	0	0	0	0	0	0
Tabernaemontana laeta Mart.	0	0	0	0	0	0	0	0	0	0	0	0	0	0	0	0	0	0
Theobroma cacao L.	0	0	0	0	0	0	0	0	0	0	0	0	0	0	0	0	0	0
Typha domingensis Pers.	0	0	0	0	0	0	0	0	0	0	0	0	0	0	0	0	0	0
Urera baccifera (L.) Gaudich. ex Wedd.	0	0	0	0	0	0	0	0	0	0	0	0	0	0	0	0	0	0
Varronia curassavica Jacq.	0	0	0	0	0	0	0	0	0	0	0	0	0	0	0	0	0	0
Vernonanthura beyrichii (Less.) H.Rob.	0	0	0	0	0	0	0	0	0	0	0	0	0	0	0	0	0	0
Xanthosoma taioba E.G.Gonç.	0	0	0	0	0	0	0	0	0	0	0	0	0	0	0	0	0	0
Zanthoxylum rhoifolium Lam.	0	0	0	0	0	0	0	0	0	0	0	0	0	0	0	0	0	0
Aleurites moluccanus (L.) Willd	0	0	0	0	0	0	0	0	0	0	0	0	0	0	0	0	0	0
Allium chinense G. Don	0	0	0	0	0	0	0	0	0	0	0	0	0	0	0	0	0	0
Allium fistulosum L.	0	0	0	0	0	0	0	0	0	0	0	0	0	0	0	0	0	0
Allium tuberosum	0	0	0	0	0	0	0	0	0	0	0	0	0	0	0	0	0	0
Annona montana Macf.	0	0	0	0	0	0	0	0	0	0	0	0	0	0	0	0	0	0
Artocarpus heterophyllus Lam	0	0	0	0	0	0	0	0	0	0	0	0	0	0	0	0	0	0
Astrocaryum aculeatissimum (Schott) Burret	0	0	0	0	0	0	0	0	0	0	0	0	0	0	0	0	0	0
Bactris sp.	0	0	0	0	0	0	0	0	0	0	0	0	0	0	0	0	0	0
Cajanus cajan (L.) Huth	0	0	0	0	0	0	0	0	0	0	0	0	0	0	0	0	0	0
Citharexylum myrianthum Cham.	0	0	0	0	0	0	0	0	0	0	0	0	0	0	0	0	0	0
Citrus sinensis (L.) Osbeck	0	0	0	0	0	0	0	0	0	0	0	0	0	0	0	0	0	0
Dioscorea sp.	0	0	0	0	0	0	0	0	0	0	0	0	0	0	0	0	0	0
Ecclinusa ramiflora Mart.	0	0	0	0	0	0	0	0	0	0	0	0	0	0	0	0	0	0
Elephantopus mollis Kunth	0	0	0	0	0	0	0	0	0	0	0	0	0	0	0	0	0	0
Eugenia cf. multicostata D. Legrand	0	0	0	0	0	0	0	0	0	1	0	0	0	0	0	0	0	0
Eugenia sp.	0	0	0	0	0	0	0	0	0	0	0	0	0	0	0	0	0	0
Eugenia sulcata Spring ex Mart.	0	0	0	0	0	0	0	0	0	0	0	0	0	0	0	0	0	0
Inga cf. lenticellata Benth.	0	0	0	0	0	0	0	0	0	1	0	0	0	0	0	0	0	0
Jacaratia spinosa (Aubl.) A.DC.	0	0	0	0	0	0	0	0	0	0	0	0	0	0	0	0	0	0
Licania sp.2	0	0	0	0	0	0	0	0	0	1	0	0	0	0	0	0	0	0
Marantaceae sp.2	0	0	0	0	0	0	0	0	0	0	0	0	0	0	0	0	0	0
Miconia dodecandra Cogn.	0	0	0	0	0	0	0	0	0	0	0	0	0	0	0	0	0	0
Miconia prasina (Sw.) DC.	0	0	0	0	0	0	0	0	0	0	0	0	0	0	0	0	0	0
Micropholis crassipedicellata (Mart. & Eichler) Pierre	0	0	0	0	0	0	0	0	0	1	0	0	0	0	0	0	0	0
Mimusops coriacea (A.DC.) Miq.	0	0	0	0	0	0	0	0	0	0	0	0	0	0	0	0	0	0
Musa sp.	0	0	0	0	0	0	0	0	0	0	0	0	0	0	0	0	0	0
Nectandra oppositifolia Nees	1	0	0	0	0	0	0	0	0	1	0	0	0	0	0	0	0	0
Passiflora miersii Mast.	0	0	0	0	0	0	0	0	0	0	0	0	0	0	0	0	0	0
Persea americana Mill.	0	0	0	0	0	0	0	0	0	0	0	0	0	0	0	0	0	0
Phaseolus vulgaris L.	0	0	0	0	0	0	0	0	0	0	0	0	0	0	0	0	0	0
Plinia sp.	0	0	0	0	0	0	0	0	0	0	0	0	0	0	0	0	0	0
Rubus urticifolius Poir.	0	0	0	0	0	0	0	0	0	0	0	0	0	0	0	0	0	0
Solanum scuticum M.Nee	0	0	0	0	0	0	0	0	0	0	0	0	0	0	0	0	0	0
Tetrorchidium sp.	0	0	0	0	0	0	0	0	0	1	0	0	0	0	0	0	0	0
Trichilia silvatica C.DC.	0	0	0	0	0	0	0	0	0	1	0	0	0	0	0	0	0	0
Urera nitida (Vell.) P.Brack	0	0	0	0	0	0	0	0	0	0	0	0	0	0	0	0	0	0
Actinostemon verticillatus (Klotzsch) Baill.	0	0	0	0	0	0	0	0	0	1	0	0	0	0	0	0	0	0
Andira fraxinifolia Benth.	0	0	0	0	0	0	1	0	0	0	0	0	0	0	0	0	0	0
Brosimum guianense (Aubl.) Huber	0	0	0	0	0	0	0	1	0	0	0	0	0	0	0	0	0	0
Cabralea canjerana (Vell.) Mart.	0	0	0	0	0	0	0	0	0	1	0	0	0	0	0	0	0	0
Cariniana estrellensis (Raddi) Kuntze	0	0	0	0	0	0	0	0	0	1	0	0	0	0	0	0	0	0
cf. Hymenolobium janeirense Kuhlm.	0	0	0	0	0	0	0	2	0	0	0	0	0	0	0	0	0	0
Citharexylum myrianthum Cham.	0	0	0	0	0	0	0	0	0	1	0	0	0	0	0	0	0	0
Cordia sp.2	0	0	0	0	0	0	0	0	0	1	0	0	0	0	0	0	0	0
Eriotheca pentaphylla (Vell. & K.Schum.) A.Robyns	0	0	0	0	0	0	0	0	0	1	0	0	0	0	0	0	0	0
Geonoma sp.	0	0	0	0	0	0	1	0	0	0	0	0	0	0	0	0	0	0
Hedyosmum brasiliense Miq.	0	0	0	0	0	0	0	0	0	1	0	0	0	0	0	0	0	0
Inga sp	0	0	0	0	0	0	0	0	0	1	0	0	0	0	0	0	0	0
Pouteria sp.2	0	0	0	0	0	0	0	0	0	1	0	0	0	0	0	0	0	0
Schefflera cf. angustissima (Marchal) Frodin	0	0	0	0	0	0	1	0	0	0	0	0	0	0	0	0	0	0
Stylogyne lhotzkyana (A.DC.) Mez	0	0	0	0	0	0	0	0	0	1	0	0	0	0	0	0	0	0
Tachigali paratyensis (Vell.) H.C.Lima	0	0	0	0	0	0	0	0	0	1	0	0	0	0	0	0	0	0
Tachigali sp.1	0	0	0	0	0	0	0	1	0	0	0	0	0	0	0	0	0	0
Tachigali sp.2	0	0	0	0	0	0	0	1	0	0	0	0	0	0	0	0	0	0
Tibouchina pulchra Cogn.	0	0	0	0	0	1	0	0	0	1	0	0	0	0	0	0	0	0
Virola bicuhyba (Schott ex Spreng.) Warb.	0	0	0	0	0	0	1	0	0	0	0	0	0	0	0	0	0	0
Vitex polygama Cham.	0	0	0	0	0	0	0	1	0	0	0	0	0	0	0	0	0	0
Xylopia brasiliensis Spreng.	0	0	0	0	0	0	0	1	0	0	0	0	0	0	0	0	0	0
Cedrela cf. odorata L	0	0	0	0	0	0	0	0	0	0	0	0	0	0	0	0	0	0
Clusia criuva subsp. parviflora Vesque	0	0	0	0	0	0	0	0	0	0	0	0	0	0	0	0	0	0
Cordia sp.3	0	0	0	0	0	0	0	0	0	0	0	0	0	0	0	0	0	0
Ficus gomelleira Kunth & C.D.Bouché	0	0	0	0	0	0	0	0	0	0	0	0	0	0	0	0	0	0
Malouetia cestroides (Nees ex Mart.) Müll. Arg.	0	0	0	0	0	0	0	0	0	0	0	0	0	0	0	0	0	0
Pourouma guianensis Aubl.	0	0	0	0	0	0	0	0	0	0	0	0	0	0	0	0	0	0
Pouteria sp.1	0	0	0	0	0	0	0	0	0	0	0	0	0	0	0	0	0	0
Pseudopiptadenia leptostachya (Benth.) Rauschert	0	0	0	0	0	0	0	0	0	0	0	0	0	0	0	0	0	0
Tachigali sp.3	0	0	0	0	0	0	0	0	0	0	0	0	0	0	0	0	0	0
Borreria verticillata (L.) G.Mey.	0	0	0	0	0	0	0	0	0	0	0	0	0	0	0	0	0	0
Guapira nitida (Mart. ex J.A.Schmidt) Lundell	0	0	0	0	0	0	0	0	0	0	0	0	0	0	0	0	0	0
Maytenus ardisiaefolia Reissek	0	0	0	0	0	0	0	0	0	0	0	0	0	0	0	0	0	0
Merostachys argyronema Lindm.	0	0	0	0	0	0	0	0	0	0	0	0	0	0	0	0	0	0
Myrcia sp.2	0	0	0	0	0	0	0	0	0	0	0	0	0	0	0	0	0	0
Myrcia sp.3	0	0	0	0	0	0	0	0	0	0	0	0	0	0	0	0	0	0
Dalbergia frutescens (Vell.) Britton	0	0	0	0	0	0	0	0	0	0	0	0	0	0	0	0	0	0
Trema micranta (L.) Blume	0	0	0	0	0	0	0	0	0	0	0	0	0	0	0	0	0	0
Myrcia sp.1	0	0	0	0	0	0	0	0	0	0	0	0	0	0	0	0	0	0
Piper cernuum Vell.	0	0	0	0	0	0	0	0	0	0	0	0	0	0	0	0	0	0
Piper cf. gaudichaudianum Kunth	0	0	0	0	0	0	0	0	0	0	0	0	0	0	0	0	0	0
Canavalia ensiformis (L.) DC.	0	0	0	0	0	0	0	0	0	0	0	0	0	0	0	0	0	0
Ctenanthe lanceolata Petersen	0	0	0	0	0	0	0	0	0	0	0	0	0	0	0	0	0	0
Tephrosia candida (Roxb.) DC.	0	0	0	0	0	0	0	0	0	0	0	0	0	0	0	0	0	0
Cyrtocymura scorpioides (Lam.) H.Rob.	0	0	0	0	0	0	0	0	0	0	0	0	0	0	0	0	0	0
Achyrocline sp.1	0	0	0	0	0	0	0	0	0	0	0	0	0	0	0	0	0	0
Marantaceae sp.1	0	0	0	0	0	0	0	0	0	0	0	0	0	0	0	0	0	0
Aloysia gratissima (Gillies & Hook.) Tronc	0	0	0	0	0	0	0	0	0	0	0	0	0	0	0	0	0	0
Ruta graveolens L.	0	0	0	0	0	0	0	0	0	0	0	0	0	0	0	0	0	0
Sansevieria trifasciata Prain	0	0	0	0	0	0	0	0	0	0	0	0	0	0	0	0	0	0
Sansevieria trifasciata 'Laurentii	0	0	0	0	0	0	0	0	0	0	0	0	0	0	0	0	0	0
Petiveria alliacea L.	0	0	0	0	0	0	0	0	0	0	0	0	0	0	0	0	0	0
Tetradenia riparia (Hochst.) Codd	0	0	0	0	0	0	0	0	0	0	0	0	0	0	0	0	0	0
Gallesia integrifolia (Spreng.) Harms	0	0	0	0	0	0	0	0	0	0	0	0	0	0	0	0	0	0
Sambucus cf. canadensis	0	0	0	0	0	0	0	0	0	0	0	0	0	0	0	0	0	0
Scoparia dulcis L.	0	0	0	0	0	0	0	0	0	0	0	0	0	0	0	0	0	0

## Sheet: Shipbuilding
community	cambury	cambury	cambury	cambury	cambury	cambury	cambury	cambury	cambury	cambury	fazenda	fazenda	fazenda	fazenda	fazenda	fazenda	fazenda	fazenda
informant	Alcides Jorge	Cremilda_da_Cruz_Catarina	Domingos	Eliete	Euclides_jr	Isac	José	Maximiano	Moises Firmino	Oziel Soares	Cirillio	Dn_Aparecida	Dn_Maria	Dn_onofria	Luciana_vieira	Maria_aparecida_vieira	Jose_vieira	vinturante_manoel
Achillea millefolium L.	0	0	0	0	0	0	0	0	0	0	0	0	0	0	0	0	0	0
Achyrocline flaccida(Weinm.) DC.	0	0	0	0	0	0	0	0	0	0	0	0	0	0	0	0	0	0
Aegiphila integrifolia (Jacq.) Moldenke	0	0	0	0	0	0	0	0	0	0	0	0	0	0	0	0	0	0
Ageratum conyzoides L.	0	0	0	0	0	0	0	0	0	0	0	0	0	0	0	0	0	0
Alternanthera brasiliana (L.) Kuntze	0	0	0	0	0	0	0	0	0	0	0	0	0	0	0	0	0	0
Amaranthus blitum L.	0	0	0	0	0	0	0	0	0	0	0	0	0	0	0	0	0	0
Anacardium occidentale L.	0	0	0	0	0	0	0	0	0	0	0	0	0	0	0	0	0	0
Aniba sp.	0	0	0	0	0	0	0	0	0	0	0	0	0	0	0	0	0	0
Annona dolabripetala Raddi	0	0	0	0	0	0	0	1	0	0	0	0	0	0	0	0	0	0
Annona muricata L.	0	0	0	0	0	0	0	0	0	0	0	0	0	0	0	0	0	0
Artocarpus altilis (Parkinson) Fosberg	0	0	0	0	0	0	0	0	0	0	0	0	0	0	0	0	0	0
Astrocaryum aculeatissimum (Schott) Burret	0	0	0	0	0	0	0	0	0	0	0	0	0	0	0	0	0	0
Baccharis sp. [Sect. Caulopterae DC.]	0	0	0	0	0	0	0	0	0	0	0	0	0	0	0	0	0	0
Bactris gasipaes Kunth	0	0	0	0	0	0	0	0	0	0	0	0	0	0	0	0	0	0
Bambusa cf. vulgaris Schrad. ex J.C.Wendl.	0	0	0	0	0	0	0	0	0	0	0	0	0	0	0	0	0	0
Bambusa sp.	0	0	0	0	0	0	0	0	0	0	0	0	0	0	0	0	0	0
Bathysa mendoncaei K.Schum.	0	0	0	0	0	0	0	0	0	0	0	0	0	0	0	0	0	0
Bidens pilosa L.	0	0	0	0	0	0	0	0	0	0	0	0	0	0	0	0	0	0
Bixa orellana L.	0	0	0	0	0	0	0	0	0	0	0	0	0	0	0	0	0	0
Brassica oleracea L. [Gr. Acephala]	0	0	0	0	0	0	0	0	0	0	0	0	0	0	0	0	0	0
Buchena viakleinii Exell	0	0	0	0	0	0	0	1	0	0	0	0	0	0	0	0	0	0
Bunchosia glandulifera (Jacq.) Kunth	0	0	0	0	0	0	0	0	0	0	0	0	0	0	0	0	0	0
Campomanesia phaea (O.Berg) Landrum	0	0	0	0	0	0	0	0	0	0	0	0	0	0	0	0	0	0
Capsicum sp.	0	0	0	0	0	0	0	0	0	0	0	0	0	0	0	0	0	0
Cecropia cf. pachystachya Trécul	0	0	0	0	0	0	0	0	0	0	0	0	0	0	0	0	0	0
Cecropia glaziovii Snethl.	0	0	0	0	0	0	0	0	0	1	0	0	0	0	0	0	0	0
Cecropia pachystachya Trécul	0	0	0	0	0	0	0	0	0	0	0	0	0	0	0	0	0	0
Cedrela fissilis Vell.	0	0	0	0	1	0	0	1	0	1	0	0	0	1	0	0	0	1
cf. Bathysa	0	0	0	0	0	0	0	0	0	0	0	0	0	0	0	0	0	0
cf. Furcraea foetida (L.) Haw.	0	0	0	0	0	0	0	0	0	0	0	0	0	0	0	0	0	0
cf. Pterocarpus rohrii Vahl	0	0	0	0	0	0	0	0	0	0	0	0	0	0	0	0	0	0
cf. Thoracocarpus bissectus (Vell.) Harling	0	0	0	0	0	0	0	0	0	0	0	0	0	0	0	0	0	0
Cichorium cf. intybus L.	0	0	0	0	0	0	0	0	0	0	0	0	0	0	0	0	0	0
Citrus reticulata Blanco	0	0	0	0	0	0	0	0	0	0	0	0	0	0	0	0	0	0
Citrus x limon (L.) Osbeck	0	0	0	0	0	0	0	0	0	0	0	0	0	0	0	0	0	0
Clidemia hirta (L.) D.Don	0	0	0	0	0	0	0	0	0	0	0	0	0	0	0	0	0	0
Coffea arabica L.	0	0	0	0	0	0	0	0	0	0	0	0	0	0	0	0	0	0
Colocasia esculenta (L.) Schott	0	0	0	0	0	0	0	0	0	0	0	0	0	0	0	0	0	0
Conyza cf. bonariensis (L.) Cronquist	0	0	0	0	0	0	0	0	0	0	0	0	0	0	0	0	0	0
Cordia sellowiana Cham.	0	0	0	0	0	0	0	0	0	0	0	0	0	0	0	0	0	0
Cordia sp.	0	0	0	0	0	0	0	1	0	0	0	0	0	0	0	0	1	0
Costus arabicus L.	0	0	0	0	0	0	0	0	0	0	0	0	0	0	0	0	0	0
Cryptocarya mandioccana Meisn.	0	0	0	0	0	0	0	0	0	0	0	0	0	0	0	0	0	0
Cryptocarya saligna Mez	0	0	0	0	0	0	0	0	0	0	0	0	0	0	0	0	0	0
Cupania oblongifolia Mart.	0	0	0	0	0	0	0	1	0	0	0	0	0	0	0	0	0	0
Cuphea carthagenensis (Jacq.) J.F.Macbr.	0	0	0	0	0	0	0	0	0	0	0	0	0	0	0	0	0	0
Curcuma longa L.	0	0	0	0	0	0	0	0	0	0	0	0	0	0	0	0	0	0
Cymbopogon citratus (DC.) Stapf	0	0	0	0	0	0	0	0	0	0	0	0	0	0	0	0	0	0
Cymbopogon nardus (L.)Rendle	0	0	0	0	0	0	0	0	0	0	0	0	0	0	0	0	0	0
Davilla rugosa Poir.	0	0	0	0	0	0	0	0	0	0	0	0	0	0	0	0	0	0
Dioscorea bulbifera L.	0	0	0	0	0	0	0	0	0	0	0	0	0	0	0	0	0	0
Dysphania ambrosioides (L.) Mosyakin & Clemants	0	0	0	0	0	0	0	0	0	0	0	0	0	0	0	0	0	0
Echinodorus grandiflorus (Cham. & Schltdl.) Micheli	0	0	0	0	0	0	0	0	0	0	0	0	0	0	0	0	0	0
Elaeocarpus cf. serratus L.	0	0	0	0	0	0	0	0	0	0	0	0	0	0	0	0	0	0
Emilia sonchifolia (L.) DC.	0	0	0	0	0	0	0	0	0	0	0	0	0	0	0	0	0	0
Erechtites valerianifolius (Wolf) DC.	0	0	0	0	0	0	0	0	0	0	0	0	0	0	0	0	0	0
Eryngium cf. coronatum Hook. & Arn.	0	0	0	0	0	0	0	0	0	0	0	0	0	0	0	0	0	0
Eryngium foetidum L	0	0	0	0	0	0	0	0	0	0	0	0	0	0	0	0	0	0
Erythroxylum pulchrum A.St.-Hil.	0	0	0	0	0	0	0	0	0	0	0	0	0	0	0	0	0	0
Eugenia astringens Cambess.	0	0	0	0	0	0	0	0	0	0	0	0	0	0	0	0	0	0
Eugenia brasiliensis Lam.	0	0	0	0	0	0	0	0	0	0	0	0	0	0	0	0	0	0
Eugenia cf. stipitata McVaugh	0	0	0	0	0	0	0	0	0	0	0	0	0	0	0	0	0	0
Eugenia uniflora L.	0	0	0	0	0	0	0	0	0	0	0	0	0	0	0	0	0	0
Euterpe edulis Mart.	0	0	0	0	0	0	0	0	0	0	0	0	0	0	0	0	0	0
Euterpe oleracea Mart.	0	0	0	0	0	0	0	0	0	0	0	0	0	0	0	0	0	0
Faramea hymenocalyx M.Gomes	0	0	0	0	0	0	0	0	0	0	0	0	0	0	0	0	0	0
Ficus adhatodifolia Schott	0	0	0	0	0	0	1	0	0	0	0	1	0	0	0	0	0	0
Foeniculum vulgare Mill.	0	0	0	0	0	0	0	0	0	0	0	0	0	0	0	0	0	0
Furcraea foetida (L.) Haw. [cf.]	0	0	0	0	0	0	0	0	0	0	0	0	0	0	0	0	0	0
Garcinia gardneriana (Planch. & Triana) Zappi	0	0	0	0	0	0	0	0	0	0	0	0	0	0	0	0	0	0
Geonoma elegans Mart.	0	0	0	0	0	0	0	0	0	0	0	0	0	0	0	0	0	0
Gossypium sp.	0	0	0	0	0	0	0	0	0	0	0	0	0	0	0	0	0	0
Guarea macrophylla Vahl	0	0	0	0	0	0	0	0	0	0	0	0	0	0	0	0	0	0
Guatteria australis A.St.-Hil.	0	0	0	0	0	0	0	0	0	0	0	0	0	0	0	0	0	0
Gymnanthemum amygdalinum (Delile) Sch.Bip. ex Walp.	0	0	0	0	0	0	0	0	0	0	0	0	0	0	0	0	0	0
Handroanthus albus (Cham.) Mattos	0	0	0	0	0	0	1	0	0	0	0	0	0	0	0	0	0	0
Hedychium coronarium J.Koenig	0	0	0	0	0	0	0	0	0	0	0	0	0	0	0	0	0	0
Huberia ovalifolia DC	0	0	0	0	0	0	0	0	0	0	0	0	0	0	0	0	0	0
Hyeronima alchorneoides Allemão	0	0	0	0	0	0	0	0	0	1	0	0	0	0	0	0	0	0
Hymenaea altissima Ducke	0	0	0	0	0	0	0	1	0	0	0	0	0	0	0	0	0	0
Hypochaeris chillensis (Kunth) Britton	0	0	0	0	0	0	0	0	0	0	0	0	0	0	0	0	0	0
Imperata sp.	0	0	0	0	0	0	0	0	0	0	0	0	0	0	0	0	0	0
Inga edulis Mart.	0	0	0	0	0	0	0	0	0	0	0	0	0	0	0	0	0	0
Inga marginata Willd.	0	0	0	0	0	0	0	0	0	0	0	0	0	0	0	0	0	0
Ipomoea batatas (L.) Lam.	0	0	0	0	0	0	0	0	0	0	0	0	0	0	0	0	0	0
Jacaranda puberula Cham.	0	0	0	0	0	0	0	0	0	0	0	0	0	0	0	0	0	0
Justicia pectoralis Jacq.	0	0	0	0	0	0	0	0	0	0	0	0	0	0	0	0	0	0
Lacistema lucidum Schnizl	0	0	0	0	0	0	0	1	0	1	0	0	0	0	0	0	0	0
Lactuca indica L.	0	0	0	0	0	0	0	0	0	0	0	0	0	0	0	0	0	0
Lippia alba (Mill.) N.E.Br. ex P.Wilson	0	0	0	0	0	0	0	0	0	0	0	0	0	0	0	0	0	0
Mabea piriri Aubl.	0	0	0	0	0	0	0	1	0	1	0	0	0	0	0	0	0	0
Manihot esculenta Crantz	0	0	0	0	0	0	0	0	0	0	0	0	0	0	0	0	0	0
Mentha sp.	0	0	0	0	0	0	0	0	0	0	0	0	0	0	0	0	0	0
Miconia cinnamomifolia (DC.) Naudin	0	0	0	0	0	0	0	0	0	0	0	0	0	0	0	0	0	0
Mikania laevigata Sch.Bip. ex Baker	0	0	0	0	0	0	0	0	0	0	0	0	0	0	0	0	0	0
Morus nigra L.	0	0	0	0	0	0	0	0	0	0	0	0	0	0	0	0	0	0
Myrcia neoriedeliana E.Lucas & C.E.Wilson	0	0	0	0	0	0	0	0	0	0	0	0	0	0	0	0	0	0
Myrcia spectabilis DC.	0	0	0	0	0	0	0	0	0	0	0	0	0	0	0	0	0	0
Myrciaria glazioviana (Kiaersk.) G.M.Barroso ex Sobral	0	0	0	0	0	0	0	0	0	0	0	0	0	0	0	0	0	0
Myrocarpus frondosus Allemão	0	0	0	0	0	0	0	0	0	0	0	0	0	0	0	0	0	0
Myrsine coriacea (Sw.) R.Br. ex Roem. & Schult.	0	0	0	0	0	0	0	1	0	0	0	0	0	0	0	0	0	0
Ocimum americanum L.	0	0	0	0	0	0	0	0	0	0	0	0	0	0	0	0	0	0
Ocimum campechianum Mill.	0	0	0	0	0	0	0	0	0	0	0	0	0	0	0	0	0	0
Ocimum gratissimum L.	0	0	0	0	0	0	0	0	0	0	0	0	0	0	0	0	0	0
Pachira glabra Pasq.	0	0	0	0	0	0	0	0	0	0	0	0	0	0	0	0	0	0
Pera glabrata (Schott) Poepp. ex Baill.	0	0	0	0	0	0	0	0	0	0	0	0	0	0	0	0	0	0
Pfaffia glomerata (Spreng.) Pedersen	0	0	0	0	0	0	0	0	0	0	0	0	0	0	0	0	0	0
Philodendron eximium Schott	0	0	0	0	0	0	0	0	0	0	0	0	0	0	0	0	0	0
Philodendron martianum Engl.	0	0	0	0	0	0	0	0	0	0	0	0	0	0	0	0	0	0
Phyllanthus niruri L.	0	0	0	0	0	0	0	0	0	0	0	0	0	0	0	0	0	0
Piper mollicomum Kunth	0	0	0	0	0	0	0	0	0	0	0	0	0	0	0	0	0	0
Piper scutifolium Yunck	0	0	0	0	0	0	0	0	0	0	0	0	0	0	0	0	0	0
Piptadenia gonoacantha (Mart.) J.F.Macbr.	0	0	0	0	0	0	0	0	0	0	0	0	0	0	0	0	0	0
Plantago australis Lam.	0	0	0	0	0	0	0	0	0	0	0	0	0	0	0	0	0	0
Plectranthus amboinicus (Lour.) Spreng.	0	0	0	0	0	0	0	0	0	0	0	0	0	0	0	0	0	0
Plectranthus barbatus Andrews	0	0	0	0	0	0	0	0	0	0	0	0	0	0	0	0	0	0
Plinia edulis (Vell.) Sobral	0	0	0	0	0	0	0	0	0	0	0	0	0	0	0	0	0	0
Polygala paniculata L.	0	0	0	0	0	0	0	0	0	0	0	0	0	0	0	0	0	0
Pouteria caimito (Ruiz & Pav.) Radlk.	0	0	0	0	0	0	0	0	0	0	0	0	0	0	0	0	0	0
Psidium cattleianum Sabine	0	0	0	0	0	0	0	0	0	0	0	0	0	0	0	0	0	0
Psidium guajava L.	0	0	0	0	0	0	0	0	0	0	0	0	0	0	0	0	0	0
Renealmia petasites Gagnep.	0	0	0	0	0	0	0	0	0	0	0	0	0	0	0	0	0	0
Ricinus communis L.	0	0	0	0	0	0	0	0	0	0	0	0	0	0	0	0	0	0
Rubus rosifolius Sm.	0	0	0	0	0	0	0	0	0	0	0	0	0	0	0	0	0	0
Rustia formosa (Cham. & Schltdl.) Klotzsch	0	0	0	0	0	0	0	0	0	0	0	0	0	0	0	0	0	0
Schinus terebinthifoliaRaddi	0	0	0	0	0	0	0	0	0	0	0	0	0	0	0	0	0	0
Schizolobium parahyba (Vell.) S.F.Blake	0	0	0	0	0	0	0	0	0	0	0	1	0	0	0	0	0	0
Sida planicaulis Cav.	0	0	0	0	0	0	0	0	0	0	0	0	0	0	0	0	0	0
Sida rhombifolia L.	0	0	0	0	0	0	0	0	0	0	0	0	0	0	0	0	0	0
Solanum americanum Mill.	0	0	0	0	0	0	0	0	0	0	0	0	0	0	0	0	0	0
Solanum capsicoides All.	0	0	0	0	0	0	0	0	0	0	0	0	0	0	0	0	0	0
Solanum pseudoquina A.St.-Hil.	0	0	0	0	0	0	0	0	0	0	0	0	0	0	0	0	0	0
Sorocea cf. guilleminiana Gaudich.	0	0	0	0	0	0	0	0	0	1	0	0	0	0	0	0	0	0
sp. 2 - Myrtaceae	0	0	0	0	0	0	0	0	0	0	0	0	0	0	0	0	0	0
Stachytarpheta cayennensis (Rich.) Vahl	0	0	0	0	0	0	0	0	0	0	0	0	0	0	0	0	0	0
Swartzia oblata R.S.Cowan	0	0	0	0	0	0	0	0	0	0	0	0	0	0	0	0	0	0
Swartzia simplex var. grandiflora (Raddi) R.S.Cowan	0	0	0	0	0	0	0	0	0	0	0	0	0	0	0	0	0	0
Syagrus pseudococos (Raddi) Glassman	0	0	0	0	0	0	0	0	0	0	0	0	0	0	0	0	0	0
Syzygium jambos (L.) Alston	0	0	0	0	0	0	0	0	0	0	0	0	0	0	0	0	0	0
Syzygium malaccense (L.) Merr. & L.M.Perry	0	0	0	0	0	0	0	0	0	0	0	0	0	0	0	0	0	0
Tabernaemontana laeta Mart.	0	0	0	0	0	0	0	0	0	0	0	0	0	0	0	0	0	0
Theobroma cacao L.	0	0	0	0	0	0	0	0	0	0	0	0	0	0	0	0	0	0
Typha domingensis Pers.	0	0	0	0	0	0	0	0	0	0	0	0	0	0	0	0	0	0
Urera baccifera (L.) Gaudich. ex Wedd.	0	0	0	0	0	0	0	0	0	0	0	0	0	0	0	0	0	0
Varronia curassavica Jacq.	0	0	0	0	0	0	0	0	0	0	0	0	0	0	0	0	0	0
Vernonanthura beyrichii (Less.) H.Rob.	0	0	0	0	0	0	0	0	0	0	0	0	0	0	0	0	0	0
Xanthosoma taioba E.G.Gonç.	0	0	0	0	0	0	0	0	0	0	0	0	0	0	0	0	0	0
Zanthoxylum rhoifolium Lam.	0	0	0	0	0	0	0	0	0	0	0	0	0	0	0	0	0	0
Aleurites moluccanus (L.) Willd	0	0	0	0	0	0	0	0	0	0	0	0	0	0	0	0	0	0
Allium chinense G. Don	0	0	0	0	0	0	0	0	0	0	0	0	0	0	0	0	0	0
Allium fistulosum L.	0	0	0	0	0	0	0	0	0	0	0	0	0	0	0	0	0	0
Allium tuberosum	0	0	0	0	0	0	0	0	0	0	0	0	0	0	0	0	0	0
Annona montana Macf.	0	0	0	0	0	0	0	0	0	0	0	0	0	0	0	0	0	0
Artocarpus heterophyllus Lam	0	0	0	0	0	0	0	0	0	0	0	0	0	0	0	0	0	0
Astrocaryum aculeatissimum (Schott) Burret	0	0	0	0	0	0	0	0	0	0	0	0	0	0	0	0	0	0
Bactris sp.	0	0	0	0	0	0	0	0	0	0	0	0	0	0	0	0	0	0
Cajanus cajan (L.) Huth	0	0	0	0	0	0	0	0	0	0	0	0	0	0	0	0	0	0
Citharexylum myrianthum Cham.	0	0	0	0	0	0	0	0	0	0	0	0	0	0	0	0	0	0
Citrus sinensis (L.) Osbeck	0	0	0	0	0	0	0	0	0	0	0	0	0	0	0	0	0	0
Dioscorea sp.	0	0	0	0	0	0	0	0	0	0	0	0	0	0	0	0	0	0
Ecclinusa ramiflora Mart.	0	0	0	0	0	0	1	0	0	1	0	0	0	0	0	0	0	0
Elephantopus mollis Kunth	0	0	0	0	0	0	0	0	0	0	0	0	0	0	0	0	0	0
Eugenia cf. multicostata D. Legrand	0	0	0	0	0	0	0	0	0	1	0	0	0	0	0	0	0	0
Eugenia sp.	0	0	0	0	0	0	0	0	0	0	0	0	0	0	0	0	0	0
Eugenia sulcata Spring ex Mart.	0	0	0	0	0	0	0	0	0	0	0	0	0	0	0	0	0	0
Inga cf. lenticellata Benth.	0	0	0	0	0	0	0	0	0	1	0	0	0	0	0	0	0	0
Jacaratia spinosa (Aubl.) A.DC.	0	0	0	0	0	0	0	0	0	0	0	0	0	0	0	0	0	0
Licania sp.2	0	0	0	0	0	0	0	0	0	0	0	0	0	0	0	0	0	0
Marantaceae sp.2	0	0	0	0	0	0	0	0	0	0	0	0	0	0	0	0	0	0
Miconia dodecandra Cogn.	0	0	0	0	0	0	0	0	0	0	0	0	0	0	0	0	0	0
Miconia prasina (Sw.) DC.	0	0	0	0	0	0	0	0	0	0	0	0	0	0	0	0	0	0
Micropholis crassipedicellata (Mart. & Eichler) Pierre	0	0	0	0	0	0	1	0	0	1	0	0	0	0	0	0	0	0
Mimusops coriacea (A.DC.) Miq.	0	0	0	0	0	0	0	0	0	0	0	0	0	0	0	0	0	0
Musa sp.	0	0	0	0	0	0	0	0	0	0	0	0	0	0	0	0	0	0
Nectandra oppositifolia Nees	0	0	0	0	0	0	1	0	0	0	0	0	0	0	0	0	0	0
Passiflora miersii Mast.	0	0	0	0	0	0	0	0	0	0	0	0	0	0	0	0	0	0
Persea americana Mill.	0	0	0	0	0	0	0	0	0	0	0	0	0	0	0	0	0	0
Phaseolus vulgaris L.	0	0	0	0	0	0	0	0	0	0	0	0	0	0	0	0	0	0
Plinia sp.	0	0	0	0	0	0	0	0	0	0	0	0	0	0	0	0	0	0
Rubus urticifolius Poir.	0	0	0	0	0	0	0	0	0	0	0	0	0	0	0	0	0	0
Solanum scuticum M.Nee	0	0	0	0	0	0	0	0	0	0	0	0	0	0	0	0	0	0
Tetrorchidium sp.	0	0	0	0	0	0	0	0	0	1	0	0	0	0	0	0	0	0
Trichilia silvatica C.DC.	0	0	0	0	0	0	0	0	0	0	0	0	0	0	0	0	0	0
Urera nitida (Vell.) P.Brack	0	0	0	0	0	0	0	0	0	0	0	0	0	0	0	0	0	0
Actinostemon verticillatus (Klotzsch) Baill.	0	0	0	0	0	0	1	0	0	0	0	0	0	0	0	0	0	0
Andira fraxinifolia Benth.	0	0	0	0	0	0	0	0	0	0	0	0	0	0	0	0	0	0
Brosimum guianense (Aubl.) Huber	0	0	0	0	0	0	0	1	0	0	0	0	0	0	0	0	0	0
Cabralea canjerana (Vell.) Mart.	0	0	0	0	1	0	0	0	0	1	0	0	0	0	0	0	0	0
Cariniana estrellensis (Raddi) Kuntze	0	0	0	0	0	0	1	0	0	0	0	0	0	0	0	0	0	0
cf. Hymenolobium janeirense Kuhlm.	0	0	0	0	0	0	0	0	0	0	0	0	0	0	0	0	0	0
Citharexylum myrianthum Cham.	0	0	0	0	0	0	0	0	0	0	0	0	0	0	0	0	0	0
Cordia sp.2	0	0	0	0	1	0	0	0	0	0	0	0	0	0	0	0	0	0
Eriotheca pentaphylla (Vell. & K.Schum.) A.Robyns	0	0	0	0	0	0	0	0	0	0	0	0	0	0	0	0	0	0
Geonoma sp.	0	0	0	0	0	0	0	0	0	0	0	0	0	0	0	0	0	0
Hedyosmum brasiliense Miq.	0	0	0	0	0	0	0	2	0	0	0	0	0	0	0	0	0	0
Inga sp	0	0	0	0	0	0	0	0	0	0	0	0	0	0	0	0	0	0
Pouteria sp.2	0	0	0	0	0	0	0	0	0	1	0	0	0	0	0	0	0	0
Schefflera angustissima (Marchal) Frodin	0	0	0	0	0	0	1	0	0	0	0	0	0	0	0	0	0	0
Stylogyne lhotzkyana (A.DC.) Mez	0	0	0	0	0	0	0	0	0	0	0	0	0	0	0	0	0	0
Tachigali paratyensis (Vell.) H.C.Lima	0	0	0	0	0	0	1	1	0	1	0	0	0	0	0	0	0	0
Tachigali sp.1	0	0	0	0	0	0	1	1	0	0	0	0	0	0	0	0	0	0
Tachigali sp.2	0	0	0	0	1	0	0	0	0	0	0	0	0	0	0	0	0	0
Tibouchina pulchra Cogn.	0	0	0	0	0	0	0	0	0	0	0	0	0	0	0	0	0	0
Virola bicuhyba (Schott ex Spreng.) Warb.	0	0	0	0	0	0	1	0	0	0	0	0	0	0	0	0	0	0
Vitex polygama Cham.	0	0	0	0	0	0	0	0	0	0	0	0	0	0	0	0	0	0
Xylopia brasiliensis Spreng.	0	0	0	0	0	0	1	0	0	1	0	0	0	0	0	0	0	0
Cedrela cf. odorata L	0	0	0	0	0	0	1	0	0	0	0	0	0	0	0	0	0	0
Clusia criuva subsp. parviflora Vesque	0	0	0	0	0	0	0	0	0	1	0	0	0	0	0	0	0	0
Cordia sp.3	0	0	0	0	0	0	1	0	0	0	0	0	0	0	0	0	0	0
Ficus gomelleira Kunth & C.D.Bouché	0	0	0	0	0	0	1	1	0	0	0	0	0	0	0	0	0	0
Malouetia cestroides (Nees ex Mart.) Müll. Arg.	0	0	0	0	1	0	0	0	0	1	0	0	0	0	0	0	0	0
Pourouma guianensis Aubl.	0	0	0	0	0	0	1	0	0	1	0	0	0	0	0	0	0	0
Pouteria sp.1	0	0	0	0	0	0	1	0	0	0	0	0	0	0	0	0	0	0
Pseudopiptadenia leptostachya (Benth.) Rauschert	0	0	0	0	1	0	1	1	0	0	0	0	0	0	0	0	0	0
Tachigali sp.3	0	0	1	0	0	0	0	0	0	0	0	0	0	0	0	0	0	0
Borreria verticillata (L.) G.Mey.	0	0	0	0	0	0	0	0	0	0	0	0	0	0	0	0	0	0
Guapira nitida (Mart. ex J.A.Schmidt) Lundell	0	0	0	0	0	0	0	0	0	0	0	0	0	0	0	0	0	0
Maytenus ardisiaefolia Reissek	0	0	0	0	0	0	0	0	0	0	0	0	0	0	0	0	0	0
Merostachys argyronema Lindm.	0	0	0	0	0	0	0	0	0	0	0	0	0	0	0	0	0	0
Myrcia sp.2	0	0	0	0	0	0	0	0	0	0	0	0	0	0	0	0	0	0
Myrcia sp.3	0	0	0	0	0	0	0	0	0	0	0	0	0	0	0	0	0	0
Dalbergia frutescens (Vell.) Britton	0	0	0	0	0	0	0	0	0	0	0	0	0	0	0	0	0	0
Trema micranta (L.) Blume	0	0	0	0	0	0	0	0	0	0	0	0	0	0	0	0	0	0
Myrcia sp.1	0	0	0	0	0	0	0	0	0	0	0	0	0	0	0	0	0	0
Piper cernuum Vell.	0	0	0	0	0	0	0	0	0	0	0	0	0	0	0	0	0	0
Piper cf. gaudichaudianum Kunth	0	0	0	0	0	0	0	0	0	0	0	0	0	0	0	0	0	0
Canavalia ensiformis (L.) DC.	0	0	0	0	0	0	0	0	0	0	0	0	0	0	0	0	0	0
Ctenanthe lanceolata Petersen	0	0	0	0	0	0	0	0	0	0	0	0	0	0	0	0	0	0
Tephrosia candida (Roxb.) DC.	0	0	0	0	0	0	0	0	0	0	0	0	0	0	0	0	0	0
Cyrtocymura scorpioides (Lam.) H.Rob.	0	0	0	0	0	0	0	0	0	0	0	0	0	0	0	0	0	0
Achyrocline sp.1	0	0	0	0	0	0	0	0	0	0	0	0	0	0	0	0	0	0
Marantaceae sp.1	0	0	0	0	0	0	0	0	0	0	0	0	0	0	0	0	0	0
Aloysia gratissima (Gillies & Hook.) Tronc	0	0	0	0	0	0	0	0	0	0	0	0	0	0	0	0	0	0
Ruta graveolens L.	0	0	0	0	0	0	0	0	0	0	0	0	0	0	0	0	0	0
Sansevieria trifasciata Prain	0	0	0	0	0	0	0	0	0	0	0	0	0	0	0	0	0	0
Sansevieria trifasciata 'Laurentii	0	0	0	0	0	0	0	0	0	0	0	0	0	0	0	0	0	0
Petiveria alliacea L.	0	0	0	0	0	0	0	0	0	0	0	0	0	0	0	0	0	0
Tetradenia riparia (Hochst.) Codd	0	0	0	0	0	0	0	0	0	0	0	0	0	0	0	0	0	0
Gallesia integrifolia (Spreng.) Harms	0	0	0	0	0	0	0	0	0	0	0	0	0	0	0	0	0	0
Sambucus cf. canadensis	0	0	0	0	0	0	0	0	0	0	0	0	0	0	0	0	0	0
Scoparia dulcis L.	0	0	0	0	0	0	0	0	0	0	0	0	0	0	0	0	0	0

## Sheet: Technology
community	cambury	cambury	cambury	cambury	cambury	cambury	cambury	cambury	cambury	cambury	fazenda	fazenda	fazenda	fazenda	fazenda	fazenda	fazenda	fazenda
informant	Alcides Jorge	Cremilda_da_Cruz_Catarina	Domingos	Eliete	Euclides_jr	Isac	José	Maximiano	Moises Firmino	Oziel Soares	Cirillio	Dn_Aparecida	Dn_Maria	Dn_onofria	Luciana_vieira	Maria_aparecida_vieira	Jose_vieira	vinturante_manoel
Achillea millefolium L.	0	0	0	0	0	0	0	0	0	0	0	0	0	0	0	0	0	0
Achyrocline flaccida(Weinm.) DC.	0	0	0	0	0	0	0	0	0	0	0	1	0	0	0	0	0	0
Aegiphila integrifolia (Jacq.) Moldenke	1	0	0	0	0	0	0	0	0	1	0	0	0	0	0	0	0	0
Ageratum conyzoides L.	0	0	0	0	0	0	0	0	0	0	0	0	0	0	0	0	0	0
Alternanthera brasiliana (L.) Kuntze	0	0	0	0	0	0	0	0	0	0	0	0	0	0	0	0	0	0
Amaranthus blitum L.	0	0	0	0	0	0	0	0	0	0	0	0	0	0	0	0	0	0
Anacardium occidentale L.	0	0	0	0	0	0	0	0	0	0	0	0	0	0	0	0	0	0
Aniba sp.	0	0	0	0	0	0	0	0	0	0	0	0	0	0	0	0	0	0
Annona dolabripetala Raddi	0	0	0	0	0	0	0	0	0	0	0	0	0	0	0	0	0	0
Annona muricata L.	0	0	0	0	0	0	0	0	0	0	0	0	0	0	0	0	0	0
Artocarpus altilis (Parkinson) Fosberg	0	0	0	0	0	0	0	0	0	0	0	0	0	0	0	0	0	0
Astrocaryum aculeatissimum (Schott) Burret	0	0	0	0	0	0	0	0	0	0	1	0	0	0	0	0	0	0
Baccharis sp. [Sect. Caulopterae DC.]	0	0	0	0	0	0	0	0	0	0	0	0	1	0	0	0	0	0
Bactris gasipaes Kunth	0	0	0	0	0	0	0	0	0	0	0	0	0	0	0	0	0	0
Bambusa cf. vulgaris Schrad. ex J.C.Wendl.	0	0	0	0	0	0	0	0	0	0	0	0	0	0	0	0	0	0
Bambusa sp.	0	0	0	0	0	0	0	0	0	0	0	0	0	0	0	0	0	0
Bathysa mendoncaei K.Schum.	0	0	0	0	0	0	0	0	0	0	0	0	0	0	0	0	0	0
Bidens pilosa L.	0	0	0	0	0	0	0	0	0	0	0	0	0	0	0	0	0	0
Bixa orellana L.	0	0	0	0	0	0	0	0	0	0	1	1	0	0	0	0	0	0
Brassica oleracea L. [Gr. Acephala]	0	0	0	0	0	0	0	0	0	0	0	0	0	0	0	0	0	0
Buchena viakleinii Exell	0	0	0	0	0	0	0	0	0	0	0	0	0	0	0	0	0	0
Bunchosia glandulifera (Jacq.) Kunth	0	0	0	0	0	0	0	0	0	0	0	0	0	0	0	0	0	0
Campomanesia phaea (O.Berg) Landrum	0	0	0	0	0	0	0	0	0	0	0	0	0	0	0	0	0	0
Capsicum sp.	0	0	0	0	0	0	0	0	0	0	0	0	0	0	0	0	0	0
Cecropia cf. pachystachya Trécul	0	0	0	0	0	0	0	0	0	0	0	0	0	0	0	0	0	0
Cecropia glaziovii Snethl.	0	0	0	0	0	0	0	0	0	0	0	0	0	0	0	0	0	0
Cecropia pachystachya Trécul	0	0	0	0	0	0	0	0	0	0	0	0	0	0	0	0	0	0
Cedrela fissilis Vell.	0	0	0	0	0	0	0	0	0	0	0	0	0	0	0	0	0	0
cf. Bathysa	0	0	0	0	0	0	0	0	0	0	0	0	0	0	0	0	0	0
cf. Furcraea foetida (L.) Haw.	0	0	0	0	0	0	0	0	0	0	1	0	0	0	0	0	0	0
cf. Pterocarpus rohrii Vahl	0	0	0	0	0	0	0	0	0	0	1	0	0	0	0	0	0	1
cf. Thoracocarpus bissectus (Vell.) Harling	0	0	0	0	0	0	0	0	0	0	0	0	0	0	0	0	0	0
Cichorium cf. intybus L.	0	0	0	0	0	0	0	0	0	0	0	0	0	0	0	0	0	0
Citrus reticulata Blanco	0	0	0	0	0	0	0	0	0	0	0	0	0	0	0	0	0	0
Citrus x limon (L.) Osbeck	0	0	0	0	0	0	0	0	0	0	0	0	0	0	0	0	0	0
Clidemia hirta (L.) D.Don	0	0	0	0	0	0	0	0	0	0	0	0	0	0	0	0	0	0
Coffea arabica L.	0	0	0	0	0	0	0	0	0	0	0	0	0	0	0	0	0	0
Colocasia esculenta (L.) Schott	0	0	0	0	0	0	0	0	0	0	0	0	0	0	0	0	0	0
Conyza cf. bonariensis (L.) Cronquist	0	0	0	0	0	0	0	0	0	0	0	0	0	0	0	0	0	0
Cordia sellowiana Cham.	0	0	0	0	0	0	0	0	0	0	0	0	0	0	0	0	0	0
Cordia sp.	0	0	0	0	0	0	0	0	0	0	0	0	0	0	0	0	0	0
Costus arabicus L.	0	0	0	0	0	0	0	0	0	0	0	0	0	0	0	0	0	0
Cryptocarya mandioccana Meisn.	0	0	0	0	0	0	0	0	0	0	0	0	0	0	0	0	0	0
Cryptocarya saligna Mez	0	0	0	0	0	0	0	0	0	0	0	0	0	0	0	0	0	1
Cupania oblongifolia Mart.	0	0	0	0	0	0	0	0	0	1	0	0	0	0	0	0	0	0
Cuphea carthagenensis (Jacq.) J.F.Macbr.	0	0	0	0	0	0	0	0	0	0	0	0	0	0	0	0	0	0
Curcuma longa L.	0	0	0	0	0	0	0	0	0	0	0	0	0	0	0	0	0	0
Cymbopogon citratus (DC.) Stapf	0	0	0	0	0	0	0	0	0	0	0	0	0	0	0	0	0	0
Cymbopogon nardus (L.)Rendle	0	0	0	0	0	0	0	0	0	0	0	0	0	0	0	0	0	0
Davilla rugosa Poir.	0	0	0	0	0	0	0	0	0	0	0	0	0	0	0	0	0	0
Dioscorea bulbifera L.	0	0	0	0	0	0	0	0	0	0	0	0	0	0	0	0	0	0
Dysphania ambrosioides (L.) Mosyakin & Clemants	0	0	0	0	0	0	0	0	0	0	0	0	0	0	0	0	0	0
Echinodorus grandiflorus (Cham. & Schltdl.) Micheli	0	0	0	0	0	0	0	0	0	0	0	0	0	0	0	0	0	0
Elaeocarpus cf. serratus L.	0	0	0	0	0	0	0	0	0	0	0	0	0	0	0	0	0	0
Emilia sonchifolia (L.) DC.	0	0	0	0	0	0	0	0	0	0	0	0	0	0	0	0	0	0
Erechtites valerianifolius (Wolf) DC.	0	0	0	0	0	0	0	0	0	0	0	0	0	0	0	0	0	0
Eryngium cf. coronatum Hook. & Arn.	0	0	0	0	0	0	0	0	0	0	0	0	0	0	0	0	0	0
Eryngium foetidum L	0	0	0	0	0	0	0	0	0	0	0	0	0	0	0	0	0	0
Erythroxylum pulchrum A.St.-Hil.	0	0	0	0	0	0	0	0	0	0	1	0	0	0	0	0	0	0
Eugenia astringens Cambess.	0	0	0	0	0	0	0	0	0	0	0	0	0	0	0	0	0	0
Eugenia brasiliensis Lam.	0	0	0	0	0	0	0	0	0	0	0	0	0	0	0	0	0	0
Eugenia cf. stipitata McVaugh	0	0	0	0	0	0	0	0	0	0	0	0	0	0	0	0	0	1
Eugenia uniflora L.	0	0	0	0	0	0	0	0	0	0	0	0	0	0	0	0	0	0
Euterpe edulis Mart.	0	0	0	0	0	0	0	0	0	0	0	0	0	0	0	0	0	0
Euterpe oleracea Mart.	0	0	0	0	0	0	0	0	0	0	0	0	0	0	0	0	0	0
Faramea hymenocalyx M.Gomes	0	0	0	0	0	0	0	0	0	0	0	0	0	0	0	0	0	1
Ficus adhatodifolia Schott	0	0	0	0	0	0	1	0	0	0	0	0	0	0	0	0	0	0
Foeniculum vulgare Mill.	0	0	0	0	0	0	0	0	0	0	0	0	0	0	0	0	0	0
Furcraea foetida (L.) Haw. [cf.]	0	0	0	0	0	0	0	0	0	0	0	0	0	0	0	0	0	0
Garcinia gardneriana (Planch. & Triana) Zappi	0	0	0	0	0	0	0	0	0	0	0	0	0	0	0	0	0	0
Geonoma elegans Mart.	0	0	0	0	0	0	0	0	0	0	0	0	0	0	0	0	0	0
Gossypium sp.	1	0	0	0	0	0	0	0	0	0	0	0	0	0	0	0	0	0
Guarea macrophylla Vahl	0	0	0	0	0	0	1	0	0	0	0	0	0	0	0	0	0	0
Guatteria australis A.St.-Hil.	0	0	0	0	0	0	0	0	0	0	0	0	0	0	0	0	0	1
Gymnanthemum amygdalinum (Delile) Sch.Bip. ex Walp.	0	0	0	0	0	0	0	0	0	0	0	0	0	0	0	0	0	0
Handroanthus albus (Cham.) Mattos	0	0	0	0	0	0	0	0	0	0	0	0	0	0	0	0	0	0
Hedychium coronarium J.Koenig	0	0	0	0	0	0	0	0	0	0	0	0	0	0	0	0	0	0
Huberia ovalifolia DC	0	0	0	0	0	0	1	0	0	0	1	0	0	0	0	0	0	0
Hyeronima alchorneoides Allemão	0	0	0	0	0	0	0	0	0	0	0	0	0	0	0	0	0	0
Hymenaea altissima Ducke	0	0	0	0	0	0	0	0	0	0	0	0	0	0	0	0	0	0
Hypochaeris chillensis (Kunth) Britton	0	0	0	0	0	0	0	0	0	0	0	0	0	0	0	0	0	0
Imperata sp.	0	0	0	0	0	0	0	0	0	0	0	0	0	0	0	0	0	0
Inga edulis Mart.	0	0	0	0	0	0	0	0	0	0	0	0	0	0	0	0	0	0
Inga marginata Willd.	0	0	0	0	0	0	0	0	0	0	0	0	0	0	0	0	0	0
Ipomoea batatas (L.) Lam.	0	0	0	0	0	0	0	0	0	0	0	0	0	0	0	0	0	0
Jacaranda puberula Cham.	0	0	0	0	0	0	0	0	0	0	0	0	0	0	0	0	0	0
Justicia pectoralis Jacq.	0	0	0	0	0	0	0	0	0	0	0	0	0	0	0	0	0	0
Lacistema lucidum Schnizl	0	0	0	0	0	0	0	0	0	0	1	0	0	0	0	0	0	0
Lactuca indica L.	0	0	0	0	0	0	0	0	0	0	0	0	0	0	0	0	0	0
Lippia alba (Mill.) N.E.Br. ex P.Wilson	0	0	0	0	0	0	0	0	0	0	0	0	0	0	0	0	0	0
Mabea piriri Aubl.	0	0	0	0	0	0	0	1	0	0	0	0	0	0	0	0	0	0
Manihot esculenta Crantz	0	0	0	0	0	0	0	0	0	0	0	0	0	0	0	0	0	0
Mentha sp.	0	0	0	0	0	0	0	0	0	0	0	0	0	0	0	0	0	0
Miconia cinnamomifolia (DC.) Naudin	0	0	0	0	0	0	0	0	0	0	0	0	0	0	0	0	0	0
Mikania laevigata Sch.Bip. ex Baker	0	0	0	0	0	0	0	0	0	0	0	0	0	0	0	0	0	0
Morus nigra L.	0	0	0	0	0	0	0	1	0	0	0	0	0	0	0	0	0	0
Myrcia neoriedeliana E.Lucas & C.E.Wilson	0	0	0	0	0	0	0	0	0	0	0	0	0	0	0	0	0	0
Myrcia spectabilis DC.	0	0	0	0	0	0	0	0	0	0	1	0	0	0	0	0	0	1
Myrciaria glazioviana (Kiaersk.) G.M.Barroso ex Sobral	0	0	0	0	0	0	0	0	0	0	0	0	0	0	0	0	0	0
Myrocarpus frondosus Allemão	0	0	0	0	0	0	0	0	0	0	0	0	0	0	0	0	0	0
Myrsine coriacea (Sw.) R.Br. ex Roem. & Schult.	0	0	0	0	0	0	0	0	0	1	0	0	0	0	0	0	0	0
Ocimum americanum L.	0	0	0	0	0	0	0	0	0	0	0	0	0	0	0	0	0	0
Ocimum campechianum Mill.	0	0	0	0	0	0	0	0	0	0	0	0	0	0	0	0	0	0
Ocimum gratissimum L.	0	0	0	0	0	0	0	0	0	0	0	0	0	0	0	0	0	0
Pachira glabra Pasq.	0	0	0	0	0	0	0	0	0	0	0	0	0	0	0	0	0	0
Pera glabrata (Schott) Poepp. ex Baill.	0	0	0	0	0	0	0	0	0	0	0	0	0	0	0	0	0	0
Pfaffia glomerata (Spreng.) Pedersen	0	0	0	0	0	0	0	0	0	0	0	0	0	0	0	0	0	0
Philodendron eximium Schott	0	0	0	0	0	0	0	0	0	0	0	1	0	0	0	0	0	0
Philodendron martianum Engl.	0	0	0	0	0	0	0	0	0	0	0	0	0	1	0	0	0	0
Phyllanthus niruri L.	0	0	0	0	0	0	0	0	0	0	0	0	0	0	0	0	0	0
Piper mollicomum Kunth	0	0	0	0	0	0	0	0	0	0	0	0	0	0	0	0	0	0
Piper scutifolium Yunck	0	0	0	0	0	0	0	0	0	0	0	0	0	0	0	0	0	0
Piptadenia gonoacantha (Mart.) J.F.Macbr.	0	0	0	0	0	0	0	0	0	0	0	0	0	0	0	0	0	0
Plantago australis Lam.	0	0	0	0	0	0	0	0	0	0	0	0	0	0	0	0	0	0
Plectranthus amboinicus (Lour.) Spreng.	0	0	0	0	0	0	0	0	0	0	0	0	0	0	0	0	0	0
Plectranthus barbatus Andrews	0	0	0	0	0	0	0	0	0	0	0	0	0	0	0	0	0	0
Plinia edulis (Vell.) Sobral	0	0	0	0	0	0	0	0	0	0	0	0	0	0	0	0	0	0
Polygala paniculata L.	0	0	0	0	0	0	0	0	0	0	0	0	0	0	0	0	0	0
Pouteria caimito (Ruiz & Pav.) Radlk.	0	0	0	0	0	0	0	0	0	0	0	0	0	0	0	0	0	0
Psidium cattleianum Sabine	0	0	0	0	0	0	0	0	0	0	0	0	0	0	0	0	0	0
Psidium guajava L.	0	0	0	0	0	0	0	0	0	0	0	0	0	0	0	0	0	0
Renealmia petasites Gagnep.	0	0	0	0	0	0	0	0	0	0	0	0	0	0	0	0	0	0
Ricinus communis L.	0	0	0	0	0	0	0	0	0	0	0	0	0	0	0	0	0	0
Rubus rosifolius Sm.	0	0	0	0	0	0	0	0	0	0	0	0	0	0	0	0	0	0
Rustia formosa (Cham. & Schltdl.) Klotzsch	0	0	0	0	0	0	0	0	0	0	0	0	0	0	0	0	0	1
Schinus terebinthifoliaRaddi	0	0	0	0	0	0	0	0	0	0	0	0	0	0	0	0	0	0
Schizolobium parahyba (Vell.) S.F.Blake	0	0	0	0	0	0	0	0	0	0	0	0	0	0	0	0	0	0
Sida planicaulis Cav.	0	0	0	0	0	0	0	0	0	0	0	0	1	0	0	0	0	0
Sida rhombifolia L.	0	0	0	0	0	0	0	0	0	0	0	0	1	0	0	0	0	0
Solanum americanum Mill.	0	0	0	0	0	0	0	0	0	0	0	0	0	0	0	0	0	0
Solanum capsicoides All.	0	0	0	0	0	0	0	0	0	0	0	0	0	0	0	0	0	0
Solanum pseudoquina A.St.-Hil.	0	0	0	0	0	0	0	0	0	1	0	0	0	0	0	0	0	0
Sorocea cf. guilleminiana Gaudich.	0	0	0	0	0	0	0	0	0	0	1	0	0	0	0	0	0	0
sp. 2 - Myrtaceae	0	0	0	0	0	0	0	0	0	0	0	0	0	0	0	0	0	1
Stachytarpheta cayennensis (Rich.) Vahl	0	0	0	0	0	0	0	0	0	0	0	0	0	0	0	0	0	0
Swartzia oblata R.S.Cowan	0	0	0	0	0	0	0	0	0	0	0	0	0	0	0	0	0	0
Swartzia simplex var. grandiflora (Raddi) R.S.Cowan	0	0	0	0	0	0	0	0	0	1	1	0	0	0	0	0	1	0
Syagrus pseudococos (Raddi) Glassman	0	0	0	0	0	0	0	0	0	0	0	0	0	0	0	0	0	0
Syzygium jambos (L.) Alston	0	0	0	0	0	0	0	0	0	0	0	0	0	0	0	0	0	0
Syzygium malaccense (L.) Merr. & L.M.Perry	0	0	0	0	0	0	0	0	0	0	0	0	0	0	0	0	0	0
Tabernaemontana laeta Mart.	0	0	0	0	0	0	0	0	0	0	0	0	0	0	0	0	0	0
Theobroma cacao L.	0	0	0	0	0	0	0	0	0	0	0	0	0	0	0	0	0	0
Typha domingensis Pers.	0	0	0	0	0	0	0	0	0	0	0	0	0	0	0	0	0	0
Urera baccifera (L.) Gaudich. ex Wedd.	0	0	0	0	0	0	0	0	0	0	0	0	0	0	0	0	0	0
Varronia curassavica Jacq.	0	0	0	0	0	0	0	0	0	0	0	0	0	0	0	0	0	0
Vernonanthura beyrichii (Less.) H.Rob.	0	0	0	0	0	0	0	0	0	0	0	0	0	0	0	0	0	0
Xanthosoma taioba E.G.Gonç.	0	0	0	0	0	0	0	0	0	1	0	0	0	0	0	0	0	0
Zanthoxylum rhoifolium Lam.	0	0	0	0	0	0	0	0	0	0	0	1	0	0	0	0	0	0
Aleurites moluccanus (L.) Willd	0	0	0	0	0	0	0	0	0	0	0	0	0	0	0	0	0	0
Allium chinense G. Don	0	0	0	0	0	0	0	0	0	0	0	0	0	0	0	0	0	0
Allium fistulosum L.	0	0	0	0	0	0	0	0	0	0	0	0	0	0	0	0	0	0
Allium tuberosum	0	0	0	0	0	0	0	0	0	0	0	0	0	0	0	0	0	0
Annona montana Macf.	0	0	0	0	0	0	0	0	0	0	0	0	0	0	0	0	0	0
Artocarpus heterophyllus Lam	0	0	0	0	0	0	0	0	0	0	0	0	0	0	0	0	0	0
Astrocaryum aculeatissimum (Schott) Burret	0	0	0	0	0	0	0	0	0	0	0	0	0	0	0	0	0	0
Bactris sp.	0	0	0	0	0	0	0	0	0	0	0	0	0	0	0	0	0	0
Cajanus cajan (L.) Huth	0	0	0	0	0	0	0	0	0	0	0	0	0	0	0	0	0	0
Citharexylum myrianthum Cham.	0	0	0	0	0	0	0	0	0	0	0	0	0	0	0	0	0	0
Citrus sinensis (L.) Osbeck	0	0	0	0	0	0	0	0	0	0	0	0	0	0	0	0	0	0
Dioscorea sp.	0	0	0	0	0	0	0	0	0	0	0	0	0	0	0	0	0	0
Ecclinusa ramiflora Mart.	0	0	0	0	0	0	0	0	0	1	0	0	0	0	0	0	0	0
Elephantopus mollis Kunth	0	0	0	0	0	0	0	0	0	0	0	0	0	0	0	0	0	0
Eugenia cf. multicostata D. Legrand	0	0	0	0	0	0	0	0	0	0	0	0	0	0	0	0	0	0
Eugenia sp.	0	0	0	0	0	0	0	0	0	0	0	0	0	0	0	0	0	0
Eugenia sulcata Spring ex Mart.	0	0	0	0	0	0	0	0	0	0	0	0	0	0	0	0	0	0
Inga cf. lenticellata Benth.	0	0	0	0	0	0	0	0	0	0	0	0	0	0	0	0	0	0
Jacaratia spinosa (Aubl.) A.DC.	0	0	0	0	0	0	0	0	0	0	0	0	0	0	0	0	0	0
Licania sp.2	0	0	0	0	0	0	0	0	0	0	0	0	0	0	0	0	0	0
Marantaceae sp.2	0	0	0	0	0	0	0	0	0	0	0	0	0	0	0	0	0	0
Miconia dodecandra Cogn.	0	0	0	0	0	0	0	0	0	0	0	0	0	0	0	0	0	0
Miconia prasina (Sw.) DC.	0	0	0	0	0	0	0	0	0	0	0	0	0	0	0	0	0	0
Micropholis crassipedicellata (Mart. & Eichler) Pierre	0	0	0	0	0	0	0	0	0	0	0	0	0	0	0	0	0	0
Mimusops coriacea (A.DC.) Miq.	0	0	0	0	0	0	0	0	0	0	0	0	0	0	0	0	0	0
Musa sp.	0	0	0	0	0	0	0	0	0	0	0	0	0	0	0	0	0	0
Nectandra oppositifolia Nees	0	0	0	0	0	0	0	0	0	0	0	0	0	0	0	0	0	0
Passiflora miersii Mast.	0	0	0	0	0	0	0	0	0	0	0	0	0	0	0	0	0	0
Persea americana Mill.	0	0	0	0	0	0	0	0	0	0	0	0	0	0	0	0	0	0
Phaseolus vulgaris L.	0	0	0	0	0	0	0	0	0	0	0	0	0	0	0	0	0	0
Plinia sp.	0	0	0	0	0	0	0	0	0	0	0	0	0	0	0	0	0	0
Rubus urticifolius Poir.	0	0	0	0	0	0	0	0	0	0	0	0	0	0	0	0	0	0
Solanum scuticum M.Nee	0	0	0	0	0	0	0	0	0	0	0	0	0	0	0	0	0	0
Tetrorchidium sp.	0	0	0	0	0	0	0	0	0	0	0	0	0	0	0	0	0	0
Trichilia silvatica C.DC.	0	0	0	0	0	0	0	0	0	0	0	0	0	0	0	0	0	0
Urera nitida (Vell.) P.Brack	0	0	0	0	0	0	0	0	0	0	0	0	0	0	0	0	0	0
Actinostemon verticillatus (Klotzsch) Baill.	0	0	0	0	0	0	0	0	0	0	0	0	0	0	0	0	0	0
Andira fraxinifolia Benth.	0	0	0	0	0	0	0	0	0	0	0	0	0	0	0	0	0	0
Brosimum guianense (Aubl.) Huber	0	0	0	0	0	0	0	1	0	0	0	0	0	0	0	0	0	0
Cabralea canjerana (Vell.) Mart.	0	0	0	0	0	0	0	0	0	0	0	0	0	0	0	0	0	0
Cariniana estrellensis (Raddi) Kuntze	0	0	0	0	0	0	0	0	0	0	0	0	0	0	0	0	0	0
cf. Hymenolobium janeirense Kuhlm.	0	0	0	0	0	0	0	0	0	0	0	0	0	0	0	0	0	0
Citharexylum myrianthum Cham.	0	0	0	0	0	0	0	0	0	0	0	0	0	0	0	0	0	0
Cordia sp.2	0	0	0	0	0	0	0	0	0	0	0	0	0	0	0	0	0	0
Eriotheca pentaphylla (Vell. & K.Schum.) A.Robyns	0	0	0	0	0	0	0	0	0	0	0	0	0	0	0	0	0	0
Geonoma sp.	0	0	0	0	0	0	0	0	0	0	0	0	0	0	0	0	0	0
Hedyosmum brasiliense Miq.	0	0	0	0	0	0	0	0	0	0	0	0	0	0	0	0	0	0
Inga sp	0	0	0	0	0	0	0	0	0	0	0	0	0	0	0	0	0	0
Pouteria sp.2	0	0	0	0	0	0	0	0	0	0	0	0	0	0	0	0	0	0
Schefflera cf. angustissima (Marchal) Frodin	0	0	0	0	0	0	0	0	0	0	0	0	0	0	0	0	0	0
Stylogyne lhotzkyana (A.DC.) Mez	0	0	0	0	0	0	0	0	0	0	0	0	0	0	0	0	0	0
Tachigali paratyensis (Vell.) H.C.Lima	0	0	0	0	0	0	0	0	0	0	0	0	0	0	0	0	0	0
Tachigali sp.1	0	0	0	0	0	0	0	0	0	0	0	0	0	0	0	0	0	0
Tachigali sp.2	0	0	0	0	0	0	0	0	0	0	0	0	0	0	0	0	0	0
Tibouchina pulchra Cogn.	0	0	0	0	0	1	0	1	0	1	0	0	0	0	0	0	0	0
Virola bicuhyba (Schott ex Spreng.) Warb.	0	0	0	0	0	0	0	0	0	0	0	0	0	0	0	0	0	0
Vitex polygama Cham.	0	0	0	0	0	0	0	0	0	0	0	0	0	0	0	0	0	0
Xylopia brasiliensis Spreng.	0	0	0	0	0	0	0	0	0	0	0	0	0	0	0	0	0	0
Cedrela cf. odorata L	0	0	0	0	0	0	0	0	0	0	0	0	0	0	0	0	0	0
Clusia criuva subsp. parviflora Vesque	0	0	0	0	0	0	1	0	0	0	0	0	0	0	0	0	0	0
Cordia sp.3	0	0	0	0	0	0	0	0	0	0	0	0	0	0	0	0	0	0
Ficus gomelleira Kunth & C.D.Bouché	0	0	0	0	0	0	0	0	0	0	0	0	0	0	0	0	0	0
Malouetia cestroides (Nees ex Mart.) Müll. Arg.	0	0	0	0	0	0	0	0	0	0	0	0	0	0	0	0	0	0
Pourouma guianensis Aubl.	0	0	0	0	0	0	0	0	0	0	0	0	0	0	0	0	0	0
Pouteria sp.1	0	0	0	0	0	0	0	0	0	0	0	0	0	0	0	0	0	0
Pseudopiptadenia leptostachya (Benth.) Rauschert	0	0	0	0	0	0	0	0	0	0	0	0	0	0	0	0	0	0
Tachigali sp.3	0	0	0	0	0	0	0	0	0	0	0	0	0	0	0	0	0	0
Borreria verticillata (L.) G.Mey.	0	0	0	0	0	0	0	0	0	0	0	0	0	0	0	0	0	0
Guapira nitida (Mart. ex J.A.Schmidt) Lundell	0	0	0	0	0	0	0	0	0	0	0	0	0	0	0	0	0	0
Maytenus ardisiaefolia Reissek	0	0	0	0	0	0	0	0	0	0	0	0	0	0	0	0	0	0
Merostachys argyronema Lindm.	0	0	0	0	0	0	0	1	0	0	0	0	0	0	0	0	0	0
Myrcia sp.2	0	0	0	0	0	0	0	0	0	0	0	0	0	0	0	0	0	0
Myrcia sp.3	0	0	0	0	0	0	0	0	0	0	0	0	0	0	0	0	0	0
Dalbergia frutescens (Vell.) Britton	0	0	0	0	0	0	0	0	0	0	0	0	0	0	0	0	0	0
Trema micranta (L.) Blume	0	0	0	0	0	0	0	0	0	0	0	0	0	0	0	0	0	0
Myrcia sp.1	0	0	0	0	0	0	0	0	0	2	0	0	0	0	0	0	0	0
Piper cernuum Vell.	0	0	0	0	0	0	0	0	0	1	0	0	0	0	0	0	0	0
Piper cf. gaudichaudianum Kunth	0	0	0	0	0	0	0	0	0	1	0	0	0	0	0	0	0	0
Canavalia ensiformis (L.) DC.	1	0	0	0	0	0	0	0	0	0	0	0	0	0	0	0	0	0
Ctenanthe lanceolata Petersen	0	0	0	0	0	0	0	1	0	0	0	0	0	0	0	0	0	0
Tephrosia candida (Roxb.) DC.	1	0	0	0	0	0	0	1	0	0	0	0	0	0	0	0	0	0
Cyrtocymura scorpioides (Lam.) H.Rob.	0	0	0	0	0	0	0	1	0	0	0	0	0	0	0	0	0	0
Achyrocline sp.1	1	0	0	0	0	0	0	0	0	0	0	0	0	0	0	0	0	0
Marantaceae sp.1	0	0	0	0	0	0	0	0	0	0	0	0	0	0	0	0	0	0
Aloysia gratissima (Gillies & Hook.) Tronc					0	0	0	0	0	0	0	0	0	0	0	0	0	0
Ruta graveolens L.					0	0	0	0	0	0	0	0	0	0	0	0	0	0
Sansevieria trifasciata Prain					0	0	0	0	0	0	0	0	0	0	0	0	0	0
Sansevieria trifasciata 'Laurentii					0	0	0	0	0	0	0	0	0	0	0	0	0	0
Petiveria alliacea L.					0	0	0	0	0	0	0	0	0	0	0	0	0	0
Tetradenia riparia (Hochst.) Codd					0	0	0	0	0	0	0	0	0	0	0	0	0	0
Gallesia integrifolia (Spreng.) Harms					0	0	0	0	0	0	0	0	0	0	0	0	0	0
Sambucus cf. canadensis					0	0	0	0	0	0	0	0	0	0	0	0	0	0
Scoparia dulcis L.					0	0	0	0	0	0	0	0	0	0	0	0	0	0

## Sheet: Fuel
community	cambury	cambury	cambury	cambury	cambury	cambury	cambury	cambury	cambury	cambury	fazenda	fazenda	fazenda	fazenda	fazenda	fazenda	fazenda	fazenda
informant	Alcides Jorge	Cremilda_da_Cruz_Catarina	Domingos	Eliete	Euclides_jr	Isac	José	Maximiano	Moises Firmino	Oziel Soares	Cirillio	Dn_Aparecida	Dn_Maria	Dn_onofria	Luciana_vieira	Maria_aparecida_vieira	Jose_vieira	vinturante_manoel
Achillea millefolium L.	0	0	0	0	0	0	0	0	0	0	0	0	0	0	0	0	0	0
Achyrocline flaccida(Weinm.) DC.	0	0	0	0	0	0	0	0	0	0	0	0	0	0	0	0	0	0
Aegiphila integrifolia (Jacq.) Moldenke	0	0	0	0	0	0	0	0	0	0	1	0	0	0	0	0	0	0
Ageratum conyzoides L.	0	0	0	0	0	0	0	0	0	0	0	0	0	0	0	0	0	0
Alternanthera brasiliana (L.) Kuntze	0	0	0	0	0	0	0	0	0	0	0	0	0	0	0	0	0	0
Amaranthus blitum L.	0	0	0	0	0	0	0	0	0	0	0	0	0	0	0	0	0	0
Anacardium occidentale L.	0	0	0	0	0	0	0	0	0	0	0	0	0	0	0	0	0	0
Aniba sp.	0	0	0	0	0	0	0	0	0	0	0	0	0	0	0	0	0	0
Annona dolabripetala Raddi	0	0	0	0	0	0	0	0	0	0	0	0	0	0	0	0	0	0
Annona muricata L.	0	0	0	0	0	0	0	0	0	0	0	0	0	0	0	0	0	0
Artocarpus altilis (Parkinson) Fosberg	0	0	0	0	0	0	0	0	0	0	0	0	0	0	0	0	0	0
Astrocaryum aculeatissimum (Schott) Burret	0	0	0	0	0	0	0	0	0	0	0	0	0	0	0	0	0	0
Baccharis sp. [Sect. Caulopterae DC.]	0	0	0	0	0	0	0	0	0	0	0	0	0	0	0	0	0	0
Bactris gasipaes Kunth	0	0	0	0	0	0	0	0	0	0	0	0	0	0	0	0	0	0
Bambusa cf. vulgaris Schrad. ex J.C.Wendl.	0	0	0	0	0	0	0	0	0	0	0	0	0	0	0	0	0	0
Bambusa sp.	0	0	0	0	0	0	0	0	0	0	0	0	0	0	0	0	0	0
Bathysa mendoncaei K.Schum.	0	0	0	0	0	0	0	0	0	0	0	0	0	0	0	0	0	0
Bidens pilosa L.	0	0	0	0	0	0	0	0	0	0	0	0	0	0	0	0	0	0
Bixa orellana L.	0	0	0	0	0	0	0	0	0	0	0	0	0	0	0	0	0	0
Brassica oleracea L. [Gr. Acephala]	0	0	0	0	0	0	0	0	0	0	0	0	0	0	0	0	0	0
Buchena viakleinii Exell	0	0	0	0	0	0	0	0	0	0	0	0	0	0	0	0	0	0
Bunchosia glandulifera (Jacq.) Kunth	0	0	0	0	0	0	0	0	0	0	0	0	0	0	0	0	0	0
Campomanesia phaea (O.Berg) Landrum	0	0	0	0	0	0	0	0	0	0	0	0	0	0	0	0	0	0
Capsicum sp.	0	0	0	0	0	0	0	0	0	0	0	0	0	0	0	0	0	0
Cecropia cf. pachystachya Trécul	0	0	0	0	0	0	0	0	0	0	0	0	0	0	0	0	0	0
Cecropia glaziovii Snethl.	0	0	0	0	0	0	0	0	0	0	0	0	0	0	0	0	0	0
Cecropia pachystachya Trécul	0	0	0	0	0	0	0	0	0	0	0	0	0	0	0	0	0	0
Cedrela fissilis Vell.	0	0	0	0	0	0	0	0	0	0	0	0	0	0	0	0	0	0
cf. Bathysa	0	0	0	0	0	0	0	0	0	0	0	0	0	0	0	0	0	0
cf. Furcraea foetida (L.) Haw.	0	0	0	0	0	0	0	0	0	0	0	0	0	0	0	0	0	0
cf. Pterocarpus rohrii Vahl	0	0	0	0	0	0	0	0	0	0	0	0	0	0	0	0	0	0
cf. Thoracocarpus bissectus (Vell.) Harling	0	0	0	0	0	0	0	0	0	0	0	0	0	0	0	0	0	0
Cichorium cf. intybus L.	0	0	0	0	0	0	0	0	0	0	0	0	0	0	0	0	0	0
Citrus reticulata Blanco	0	0	0	0	0	0	0	0	0	0	0	0	0	0	0	0	0	0
Citrus x limon (L.) Osbeck	0	0	0	0	0	0	0	0	0	0	0	0	0	0	0	0	0	0
Clidemia hirta (L.) D.Don	0	0	0	0	0	0	0	0	0	0	0	0	0	0	0	0	0	0
Coffea arabica L.	0	0	0	0	0	0	0	0	0	0	0	0	0	0	0	0	0	0
Colocasia esculenta (L.) Schott	0	0	0	0	0	0	0	0	0	0	0	0	0	0	0	0	0	0
Conyza cf. bonariensis (L.) Cronquist	0	0	0	0	0	0	0	0	0	0	0	0	0	0	0	0	0	0
Cordia sellowiana Cham.	0	0	0	0	0	0	0	0	0	0	0	0	0	0	0	0	0	0
Cordia sp.	0	0	0	0	0	0	0	0	0	0	0	0	0	0	0	0	0	0
Costus arabicus L.	0	0	0	0	0	0	0	0	0	0	0	0	0	0	0	0	0	0
Cryptocarya mandioccana Meisn.	0	0	0	0	0	0	0	0	0	0	0	0	0	0	0	0	0	0
Cryptocarya saligna Mez	0	0	0	0	0	0	0	0	0	0	0	0	0	0	0	0	0	0
Cupania oblongifolia Mart.	0	0	0	0	0	0	0	0	0	1	0	0	0	0	0	0	0	0
Cuphea carthagenensis (Jacq.) J.F.Macbr.	0	0	0	0	0	0	0	0	0	0	0	0	0	0	0	0	0	0
Curcuma longa L.	0	0	0	0	0	0	0	0	0	0	0	0	0	0	0	0	0	0
Cymbopogon citratus (DC.) Stapf	0	0	0	0	0	0	0	0	0	0	0	0	0	0	0	0	0	0
Cymbopogon nardus (L.)Rendle	0	0	0	0	0	0	0	0	0	0	0	0	0	0	0	0	0	0
Davilla rugosa Poir.	0	0	0	0	0	0	0	0	0	0	0	0	0	0	0	0	0	0
Dioscorea bulbifera L.	0	0	0	0	0	0	0	0	0	0	0	0	0	0	0	0	0	0
Dysphania ambrosioides (L.) Mosyakin & Clemants	0	0	0	0	0	0	0	0	0	0	0	0	0	0	0	0	0	0
Echinodorus grandiflorus (Cham. & Schltdl.) Micheli	0	0	0	0	0	0	0	0	0	0	0	0	0	0	0	0	0	0
Elaeocarpus cf. serratus L.	0	0	0	0	0	0	0	0	0	0	0	0	0	0	0	0	0	0
Emilia sonchifolia (L.) DC.	0	0	0	0	0	0	0	0	0	0	0	0	0	0	0	0	0	0
Erechtites valerianifolius (Wolf) DC.	0	0	0	0	0	0	0	0	0	0	0	0	0	0	0	0	0	0
Eryngium cf. coronatum Hook. & Arn.	0	0	0	0	0	0	0	0	0	0	0	0	0	0	0	0	0	0
Eryngium foetidum L	0	0	0	0	0	0	0	0	0	0	0	0	0	0	0	0	0	0
Erythroxylum pulchrum A.St.-Hil.	0	0	0	0	0	0	0	0	0	0	0	0	0	0	0	0	0	0
Eugenia astringens Cambess.	0	0	0	0	0	0	0	0	0	0	0	0	0	0	0	0	1	0
Eugenia brasiliensis Lam.	0	0	0	0	0	0	0	0	0	0	0	0	0	0	0	0	0	0
Eugenia cf. stipitata McVaugh	0	0	0	0	0	0	0	0	0	0	0	0	0	0	0	0	0	0
Eugenia uniflora L.	0	0	0	0	0	0	0	0	0	0	0	0	0	0	0	0	0	0
Euterpe edulis Mart.	0	0	0	0	0	0	0	0	0	0	0	0	0	0	0	0	0	0
Euterpe oleracea Mart.	0	0	0	0	0	0	0	0	0	0	0	0	0	0	0	0	0	0
Faramea hymenocalyx M.Gomes	0	0	0	0	0	0	0	0	0	0	0	0	0	0	0	0	0	0
Ficus adhatodifolia Schott	0	0	0	0	0	0	0	0	0	0	0	0	0	0	0	0	0	0
Foeniculum vulgare Mill.	0	0	0	0	0	0	0	0	0	0	0	0	0	0	0	0	0	0
Furcraea foetida (L.) Haw. [cf.]	0	0	0	0	0	0	0	0	0	0	0	0	0	0	0	0	0	0
Garcinia gardneriana (Planch. & Triana) Zappi	0	0	0	0	0	0	0	0	0	0	0	0	0	0	0	0	0	0
Geonoma elegans Mart.	0	0	0	0	0	0	0	0	0	0	0	0	0	0	0	0	0	0
Gossypium sp.	0	0	0	0	0	0	0	0	0	0	0	0	0	0	0	0	0	0
Guarea macrophylla Vahl	0	0	0	0	0	0	0	0	0	0	0	0	0	0	0	0	0	0
Guatteria australis A.St.-Hil.	0	0	0	0	0	0	0	0	0	0	0	0	0	0	0	0	0	0
Gymnanthemum amygdalinum (Delile) Sch.Bip. ex Walp.	0	0	0	0	0	0	0	0	0	0	0	0	0	0	0	0	0	0
Handroanthus albus (Cham.) Mattos	0	0	0	0	0	0	0	0	0	0	0	0	0	0	0	0	0	0
Hedychium coronarium J.Koenig	0	0	0	0	0	0	0	0	0	0	0	0	0	0	0	0	0	0
Huberia ovalifolia DC	0	0	0	0	0	0	0	0	0	0	0	0	0	0	0	0	0	0
Hyeronima alchorneoides Allemão	0	0	0	0	0	0	0	0	0	0	0	0	0	0	0	0	0	0
Hymenaea altissima Ducke	0	0	0	0	0	0	0	0	0	1	0	0	0	0	0	0	0	0
Hypochaeris chillensis (Kunth) Britton	0	0	0	0	0	0	0	0	0	0	0	0	0	0	0	0	0	0
Imperata sp.	0	0	0	0	0	0	0	0	0	0	0	0	0	0	0	0	0	0
Inga edulis Mart.	0	0	0	0	0	0	0	0	0	0	0	0	0	0	0	0	0	0
Inga marginata Willd.	0	0	0	0	0	0	0	0	0	0	0	0	0	0	0	0	0	0
Ipomoea batatas (L.) Lam.	0	0	0	0	0	0	0	0	0	0	0	0	0	0	0	0	0	0
Jacaranda puberula Cham.	0	0	0	0	0	0	0	0	0	0	0	0	0	0	0	0	0	0
Justicia pectoralis Jacq.	0	0	0	0	0	0	0	0	0	0	0	0	0	0	0	0	0	0
Lacistema lucidum Schnizl	0	0	0	0	0	0	0	0	0	1	0	0	0	0	0	0	0	0
Lactuca indica L.	0	0	0	0	0	0	0	0	0	0	0	0	0	0	0	0	0	0
Lippia alba (Mill.) N.E.Br. ex P.Wilson	0	0	0	0	0	0	0	0	0	0	0	0	0	0	0	0	0	0
Mabea piriri Aubl.	0	0	0	0	0	0	0	1	0	0	0	0	0	0	0	0	0	0
Manihot esculenta Crantz	0	0	0	0	0	0	0	0	0	0	0	0	0	0	0	0	0	0
Mentha sp.	0	0	0	0	0	0	0	0	0	0	0	0	0	0	0	0	0	0
Miconia cinnamomifolia (DC.) Naudin	0	0	0	0	0	0	0	0	0	0	0	0	0	0	0	0	0	0
Mikania laevigata Sch.Bip. ex Baker	0	0	0	0	0	0	0	0	0	0	0	0	0	0	0	0	0	0
Morus nigra L.	0	0	0	0	0	0	0	0	0	0	0	0	0	0	0	0	0	0
Myrcia neoriedeliana E.Lucas & C.E.Wilson	0	0	0	0	0	0	0	0	0	0	0	0	0	0	0	0	0	0
Myrcia spectabilis DC.	0	0	0	0	0	0	0	0	0	0	0	0	0	0	0	0	0	0
Myrciaria glazioviana (Kiaersk.) G.M.Barroso ex Sobral	0	0	0	0	0	0	0	0	0	0	0	0	0	0	0	0	0	0
Myrocarpus frondosus Allemão	0	0	0	0	0	0	0	0	0	0	0	0	0	0	0	0	0	0
Myrsine coriacea (Sw.) R.Br. ex Roem. & Schult.	0	0	0	0	0	0	0	0	0	0	0	0	0	0	0	0	0	0
Ocimum americanum L.	0	0	0	0	0	0	0	0	0	0	0	0	0	0	0	0	0	0
Ocimum campechianum Mill.	0	0	0	0	0	0	0	0	0	0	0	0	0	0	0	0	0	0
Ocimum gratissimum L.	0	0	0	0	0	0	0	0	0	0	0	0	0	0	0	0	0	0
Pachira glabra Pasq.	0	0	0	0	0	0	0	0	0	0	0	0	0	0	0	0	0	0
Pera glabrata (Schott) Poepp. ex Baill.	0	0	0	0	0	0	0	1	0	1	0	0	0	0	0	0	1	0
Pfaffia glomerata (Spreng.) Pedersen	0	0	0	0	0	0	0	0	0	0	0	0	0	0	0	0	0	0
Philodendron eximium Schott	0	0	0	0	0	0	0	0	0	0	0	0	0	0	0	0	0	0
Philodendron martianum Engl.	0	0	0	0	0	0	0	0	0	0	0	0	0	0	0	0	0	0
Phyllanthus niruri L.	0	0	0	0	0	0	0	0	0	0	0	0	0	0	0	0	0	0
Piper mollicomum Kunth	0	0	0	0	0	0	0	0	0	0	0	0	0	0	0	0	0	0
Piper scutifolium Yunck	0	0	0	0	0	0	0	0	0	0	0	0	0	0	0	0	0	0
Piptadenia gonoacantha (Mart.) J.F.Macbr.	0	0	0	0	0	0	0	0	0	0	0	0	0	0	0	0	0	0
Plantago australis Lam.	0	0	0	0	0	0	0	0	0	0	0	0	0	0	0	0	0	0
Plectranthus amboinicus (Lour.) Spreng.	0	0	0	0	0	0	0	0	0	0	0	0	0	0	0	0	0	0
Plectranthus barbatus Andrews	0	0	0	0	0	0	0	0	0	0	0	0	0	0	0	0	0	0
Plinia edulis (Vell.) Sobral	0	0	0	0	0	1	0	0	0	1	0	0	0	0	0	0	0	0
Polygala paniculata L.	0	0	0	0	0	0	0	0	0	0	0	0	0	0	0	0	0	0
Pouteria caimito (Ruiz & Pav.) Radlk.	0	0	0	0	0	0	0	0	0	0	0	0	0	0	0	0	1	0
Psidium cattleianum Sabine	0	0	0	0	0	0	0	0	0	0	0	0	0	0	0	0	0	0
Psidium guajava L.	0	0	0	0	0	0	0	0	0	0	0	0	0	0	0	0	0	0
Renealmia petasites Gagnep.	0	0	0	0	0	0	0	0	0	0	0	0	0	0	0	0	0	0
Ricinus communis L.	0	0	0	0	0	0	0	0	0	0	0	0	0	0	0	0	1	0
Rubus rosifolius Sm.	0	0	0	0	0	0	0	0	0	0	0	0	0	0	0	0	0	0
Rustia formosa (Cham. & Schltdl.) Klotzsch	0	0	0	0	0	0	0	0	0	0	0	0	0	0	0	0	0	0
Schinus terebinthifoliaRaddi	0	0	0	0	0	0	0	0	0	0	0	0	0	0	0	0	0	0
Schizolobium parahyba (Vell.) S.F.Blake	0	0	0	0	0	0	0	0	0	0	0	0	0	0	0	0	0	0
Sida planicaulis Cav.	0	0	0	0	0	0	0	0	0	0	0	0	0	0	0	0	0	0
Sida rhombifolia L.	0	0	0	0	0	0	0	0	0	0	0	0	0	0	0	0	0	0
Solanum americanum Mill.	0	0	0	0	0	0	0	0	0	0	0	0	0	0	0	0	0	0
Solanum capsicoides All.	0	0	0	0	0	0	0	0	0	0	0	0	0	0	0	0	0	0
Solanum pseudoquina A.St.-Hil.	1	0	0	0	0	0	1	0	0	1	0	0	0	0	0	0	0	0
Sorocea cf. guilleminiana Gaudich.	0	0	0	0	0	0	0	0	0	0	0	0	0	0	0	0	0	0
sp. 2 - Myrtaceae	0	0	0	0	0	0	0	0	0	0	0	0	0	0	0	0	0	0
Stachytarpheta cayennensis (Rich.) Vahl	0	0	0	0	0	0	0	0	0	0	0	0	0	0	0	0	0	0
Swartzia oblata R.S.Cowan	0	0	0	0	0	0	0	0	0	0	0	0	0	0	0	0	0	0
Swartzia simplex var. grandiflora (Raddi) R.S.Cowan	0	0	0	0	0	0	0	1	0	1	0	0	0	0	0	0	1	0
Syagrus pseudococos (Raddi) Glassman	0	0	0	0	0	0	0	0	0	0	0	0	0	0	0	0	0	0
Syzygium jambos (L.) Alston	0	0	0	0	0	0	0	0	0	0	0	0	0	0	0	0	0	0
Syzygium malaccense (L.) Merr. & L.M.Perry	0	0	0	0	0	0	0	0	0	0	0	0	0	0	0	0	0	0
Tabernaemontana laeta Mart.	0	0	0	0	0	0	0	0	0	0	0	0	0	0	0	0	0	0
Theobroma cacao L.	0	0	0	0	0	0	0	0	0	0	0	0	0	0	0	0	0	0
Typha domingensis Pers.	0	0	0	0	0	0	0	0	0	0	0	0	0	0	0	0	0	0
Urera baccifera (L.) Gaudich. ex Wedd.	0	0	0	0	0	0	0	0	0	0	0	0	0	0	0	0	0	0
Varronia curassavica Jacq.	0	0	0	0	0	0	0	0	0	0	0	0	0	0	0	0	0	0
Vernonanthura beyrichii (Less.) H.Rob.	0	0	0	0	0	0	0	0	0	0	0	0	0	0	0	0	0	0
Xanthosoma taioba E.G.Gonç.	0	0	0	0	0	0	0	0	0	0	0	0	0	0	0	0	0	0
Zanthoxylum rhoifolium Lam.	0	0	0	0	0	0	0	0	0	0	0	0	0	0	0	0	0	0
Aleurites moluccanus (L.) Willd	0	0	0	0	0	0	2	0	0	0	0	0	0	0	0	0	0	0
Allium chinense G. Don	0	0	0	0	0	0	0	0	0	0	0	0	0	0	0	0	0	0
Allium fistulosum L.	0	0	0	0	0	0	0	0	0	0	0	0	0	0	0	0	0	0
Allium tuberosum	0	0	0	0	0	0	0	0	0	0	0	0	0	0	0	0	0	0
Annona montana Macf.	0	0	0	0	0	0	0	0	0	0	0	0	0	0	0	0	0	0
Artocarpus heterophyllus Lam	0	0	0	0	0	0	0	0	0	0	0	0	0	0	0	0	0	0
Astrocaryum aculeatissimum (Schott) Burret	0	0	0	0	0	0	0	0	0	0	0	0	0	0	0	0	0	0
Bactris sp.	0	0	0	0	0	0	0	0	0	0	0	0	0	0	0	0	0	0
Cajanus cajan (L.) Huth	0	0	0	0	0	0	0	0	0	0	0	0	0	0	0	0	0	0
Citharexylum myrianthum Cham.	0	0	0	0	0	0	0	0	0	0	0	0	0	0	0	0	0	0
Citrus sinensis (L.) Osbeck	0	0	0	0	0	0	0	0	0	0	0	0	0	0	0	0	0	0
Dioscorea sp.	0	0	0	0	0	0	0	0	0	0	0	0	0	0	0	0	0	0
Ecclinusa ramiflora Mart.	0	0	0	0	0	0	0	1	0	0	0	0	0	0	0	0	0	0
Elephantopus mollis Kunth	0	0	0	0	0	0	0	0	0	0	0	0	0	0	0	0	0	0
Eugenia cf. multicostata D. Legrand	0	0	0	0	0	0	0	0	0	0	0	0	0	0	0	0	0	0
Eugenia sp.	0	0	0	0	0	0	0	0	0	0	0	0	0	0	0	0	0	0
Eugenia sulcata Spring ex Mart.	0	0	0	0	0	0	0	0	0	0	0	0	0	0	0	0	0	0
Inga cf. lenticellata Benth.	0	0	0	0	0	0	0	0	0	0	0	0	0	0	0	0	0	0
Jacaratia spinosa (Aubl.) A.DC.	0	0	0	0	0	0	0	0	0	0	0	0	0	0	0	0	0	0
Licania sp.2	0	0	0	0	0	0	0	0	0	0	0	0	0	0	0	0	0	0
Marantaceae sp.2	0	0	0	0	0	0	0	0	0	0	0	0	0	0	0	0	0	0
Miconia dodecandra Cogn.	0	0	0	0	0	0	0	0	0	0	0	0	0	0	0	0	0	0
Miconia prasina (Sw.) DC.	0	0	0	0	0	0	0	0	0	0	0	0	0	0	0	0	0	0
Micropholis crassipedicellata (Mart. & Eichler) Pierre	0	0	0	0	0	0	0	0	0	0	0	0	0	0	0	0	0	0
Mimusops coriacea (A.DC.) Miq.	0	0	0	0	0	0	0	0	0	0	0	0	0	0	0	0	0	0
Musa sp.	0	0	0	0	0	0	0	0	0	0	0	0	0	0	0	0	0	0
Nectandra oppositifolia Nees	0	0	0	0	0	0	0	0	0	0	0	0	0	0	0	0	0	0
Passiflora miersii Mast.	0	0	0	0	0	0	0	0	0	0	0	0	0	0	0	0	0	0
Persea americana Mill.	0	0	0	0	0	0	0	0	0	0	0	0	0	0	0	0	0	0
Phaseolus vulgaris L.	0	0	0	0	0	0	0	0	0	0	0	0	0	0	0	0	0	0
Plinia sp.	0	0	0	0	0	0	0	0	0	0	0	0	0	0	0	0	0	0
Rubus urticifolius Poir.	0	0	0	0	0	0	0	0	0	0	0	0	0	0	0	0	0	0
Solanum scuticum M.Nee	0	0	0	0	0	0	0	0	0	0	0	0	0	0	0	0	0	0
Tetrorchidium sp.	0	0	0	0	0	0	0	0	0	0	0	0	0	0	0	0	0	0
Trichilia silvatica C.DC.	0	0	0	0	0	0	0	0	0	0	0	0	0	0	0	0	0	0
Urera nitida (Vell.) P.Brack	0	0	0	0	0	0	0	0	0	0	0	0	0	0	0	0	0	0
Actinostemon verticillatus (Klotzsch) Baill.	0	0	0	0	0	0	0	1	0	0	0	0	0	0	0	0	0	0
Andira fraxinifolia Benth.	0	0	0	0	0	0	0	0	0	0	0	0	0	0	0	0	0	0
Brosimum guianense (Aubl.) Huber	0	0	0	0	0	0	0	0	0	0	0	0	0	0	0	0	0	0
Cabralea canjerana (Vell.) Mart.	0	0	0	0	0	0	0	0	0	0	0	0	0	0	0	0	0	0
Cariniana estrellensis (Raddi) Kuntze	0	0	0	0	0	0	0	0	0	0	0	0	0	0	0	0	0	0
cf. Hymenolobium janeirense Kuhlm.	0	0	0	0	0	0	0	0	0	0	0	0	0	0	0	0	0	0
Citharexylum myrianthum Cham.	0	0	0	0	0	0	0	0	0	0	0	0	0	0	0	0	0	0
Cordia sp.2	0	0	0	0	0	0	0	0	0	0	0	0	0	0	0	0	0	0
Eriotheca pentaphylla (Vell. & K.Schum.) A.Robyns	0	0	0	0	0	0	0	0	0	0	0	0	0	0	0	0	0	0
Geonoma sp.	0	0	0	0	0	0	0	0	0	0	0	0	0	0	0	0	0	0
Hedyosmum brasiliense Miq.	0	0	0	0	0	0	0	0	0	0	0	0	0	0	0	0	0	0
Inga sp	0	0	0	0	0	0	0	0	0	0	0	0	0	0	0	0	0	0
Pouteria sp.2	0	0	0	0	0	0	0	0	0	0	0	0	0	0	0	0	0	0
Schefflera cf. angustissima (Marchal) Frodin	0	0	0	0	0	0	0	0	0	0	0	0	0	0	0	0	0	0
Stylogyne lhotzkyana (A.DC.) Mez	0	0	0	0	0	0	0	0	0	1	0	0	0	0	0	0	0	0
Tachigali paratyensis (Vell.) H.C.Lima	0	0	0	0	0	0	0	0	0	1	0	0	0	0	0	0	0	0
Tachigali sp.1	0	0	0	0	0	0	0	0	0	0	0	0	0	0	0	0	0	0
Tachigali sp.2	0	0	0	0	0	0	0	1	0	0	0	0	0	0	0	0	0	0
Tibouchina pulchra Cogn.	0	0	0	0	0	0	1	1	0	0	0	0	0	0	0	0	0	0
Virola bicuhyba (Schott ex Spreng.) Warb.	0	0	0	0	0	0	1	1	0	1	0	0	0	0	0	0	0	0
Vitex polygama Cham.	0	0	0	0	0	0	0	0	0	0	0	0	0	0	0	0	0	0
Xylopia brasiliensis Spreng.	0	0	0	0	0	0	0	0	0	0	0	0	0	0	0	0	0	0
Cedrela cf. odorata L	0	0	0	0	0	0	0	0	0	0	0	0	0	0	0	0	0	0
Clusia criuva subsp. parviflora Vesque	0	0	0	0	0	0	0	0	0	0	0	0	0	0	0	0	0	0
Cordia sp.3	0	0	0	0	0	0	0	0	0	0	0	0	0	0	0	0	0	0
Ficus gomelleira Kunth & C.D.Bouché	0	0	0	0	0	0	0	0	0	0	0	0	0	0	0	0	0	0
Malouetia cestroides (Nees ex Mart.) Müll. Arg.	0	0	0	0	0	0	0	0	0	0	0	0	0	0	0	0	0	0
Pourouma guianensis Aubl.	0	0	0	0	0	0	0	0	0	0	0	0	0	0	0	0	0	0
Pouteria sp.1	0	0	0	0	0	0	0	0	0	0	0	0	0	0	0	0	0	0
Pseudopiptadenia leptostachya (Benth.) Rauschert	0	0	0	0	0	0	0	0	0	0	0	0	0	0	0	0	0	0
Tachigali sp.3	0	0	0	0	0	0	0	0	0	0	0	0	0	0	0	0	0	0
Borreria verticillata (L.) G.Mey.	0	0	0	0	0	0	0	0	0	0	0	0	0	0	0	0	0	0
Guapira nitida (Mart. ex J.A.Schmidt) Lundell	0	0	0	0	0	0	0	0	0	0	0	0	0	0	0	0	0	0
Maytenus ardisiaefolia Reissek	0	0	0	0	0	0	0	0	0	0	0	0	0	0	0	0	0	0
Merostachys argyronema Lindm.	0	0	0	0	0	0	0	0	0	0	0	0	0	0	0	0	0	0
Myrcia sp.2	0	0	0	0	0	0	0	0	0	0	0	0	0	0	0	0	0	0
Myrcia sp.3	0	0	0	0	0	0	0	0	0	0	0	0	0	0	0	0	0	0
Dalbergia frutescens (Vell.) Britton	0	0	0	0	0	0	0	1	0	0	0	0	0	0	0	0	0	0
Trema micranta (L.) Blume	0	0	0	0	0	0	1	1	0	1	0	0	0	0	0	0	0	0
Myrcia sp.1	0	0	0	0	0	0	0	0	0	0	0	0	0	0	0	0	0	0
Piper cernuum Vell.	0	0	0	0	0	0	0	0	0	0	0	0	0	0	0	0	0	0
Piper cf. gaudichaudianum Kunth	0	0	0	0	0	0	0	0	0	0	0	0	0	0	0	0	0	0
Canavalia ensiformis (L.) DC.	0	0	0	0	0	0	0	0	0	0	0	0	0	0	0	0	0	0
Ctenanthe lanceolata Petersen	0	0	0	0	0	0	0	0	0	0	0	0	0	0	0	0	0	0
Tephrosia candida (Roxb.) DC.	0	0	0	0	0	0	0	0	0	0	0	0	0	0	0	0	0	0
Cyrtocymura scorpioides (Lam.) H.Rob.	0	0	0	0	0	0	0	0	0	0	0	0	0	0	0	0	0	0
Achyrocline sp.1	0	0	0	0	0	0	0	0	0	0	0	0	0	0	0	0	0	0
Marantaceae sp.1	0	0	0	0	0	0	0	0	0	0	0	0	0	0	0	0	0	0
Aloysia gratissima (Gillies & Hook.) Tronc	0	0	0	0	0	0	0	0	0	0	0	0	0	0	0	0	0	0
Ruta graveolens L.	0	0	0	0	0	0	0	0	0	0	0	0	0	0	0	0	0	0
Sansevieria trifasciata Prain	0	0	0	0	0	0	0	0	0	0	0	0	0	0	0	0	0	0
Sansevieria trifasciata 'Laurentii	0	0	0	0	0	0	0	0	0	0	0	0	0	0	0	0	0	0
Petiveria alliacea L.	0	0	0	0	0	0	0	0	0	0	0	0	0	0	0	0	0	0
Tetradenia riparia (Hochst.) Codd	0	0	0	0	0	0	0	0	0	0	0	0	0	0	0	0	0	0
Gallesia integrifolia (Spreng.) Harms	0	0	0	0	0	0	0	0	0	0	0	0	0	0	0	0	0	0
Sambucus cf. canadensis	0	0	0	0	0	0	0	0	0	0	0	0	0	0	0	0	0	0
Scoparia dulcis L.	0	0	0	0	0	0	0	0	0	0	0	0	0	0	0	0	0	0

## Sheet: handicraft
community	cambury	cambury	cambury	cambury	cambury	cambury	cambury	cambury	cambury	cambury	fazenda	fazenda	fazenda	fazenda	fazenda	fazenda	fazenda	fazenda
informant	Alcides Jorge	Cremilda_da_Cruz_Catarina	Domingos	Eliete	Euclides_jr	Isac	José	Maximiano	Moises Firmino	Oziel Soares	Cirillio	Dn_Aparecida	Dn_Maria	Dn_onofria	Luciana_vieira	Maria_aparecida_vieira	Jose_vieira	vinturante_manoel
Achillea millefolium L.	0	0	0	0	0	0	0	0	0	0	0	0	0	0	0	0	0	0
Achyrocline flaccida(Weinm.) DC.	0	0	0	0	0	0	0	0	0	0	0	0	0	0	0	0	0	0
Aegiphila integrifolia (Jacq.) Moldenke	0	0	0	0	0	0	0	0	0	0	1	0	0	0	0	0	0	0
Ageratum conyzoides L.	0	0	0	0	0	0	0	0	0	0	0	0	0	0	0	0	0	0
Alternanthera brasiliana (L.) Kuntze	0	0	0	0	0	0	0	0	0	0	0	0	0	0	0	0	0	0
Amaranthus blitum L.	0	0	0	0	0	0	0	0	0	0	0	0	0	0	0	0	0	0
Anacardium occidentale L.	0	0	0	0	0	0	0	0	0	0	0	0	0	0	0	0	0	0
Aniba sp.	0	0	0	0	0	0	0	0	0	0	0	0	0	0	0	0	0	0
Annona dolabripetala Raddi	0	0	0	1	0	1	0	1	0	1	0	0	0	0	0	0	0	0
Annona muricata L.	0	0	0	0	0	0	0	0	0	0	0	0	0	0	0	0	0	0
Artocarpus altilis (Parkinson) Fosberg	0	0	0	0	0	0	0	0	0	0	0	0	0	0	0	0	0	0
Astrocaryum aculeatissimum (Schott) Burret	0	0	0	0	0	0	1	0	0	1	1	0	0	0	0	0	0	0
Baccharis sp. [Sect. Caulopterae DC.]	0	0	0	0	0	0	0	0	0	0	0	0	0	0	0	0	0	0
Bactris gasipaes Kunth	0	0	0	0	0	0	0	0	0	0	0	0	0	0	0	0	0	0
Bambusa cf. vulgaris Schrad. ex J.C.Wendl.	0	0	0	0	0	0	0	0	0	0	0	0	0	0	0	0	0	0
Bambusa sp.	0	0	0	0	0	0	0	1	0	0	0	0	0	0	0	0	0	0
Bathysa mendoncaei K.Schum.	0	0	0	0	0	0	0	0	0	0	0	0	0	0	0	0	0	0
Bidens pilosa L.	0	0	0	0	0	0	0	0	0	0	0	0	0	0	0	0	0	0
Bixa orellana L.	0	0	0	0	0	0	0	0	0	0	0	0	0	0	0	0	0	0
Brassica oleracea L. [Gr. Acephala]	0	0	0	0	0	0	0	0	0	0	0	0	0	0	0	0	0	0
Buchena viakleinii Exell	0	0	0	0	0	0	0	0	0	0	0	0	0	0	0	0	0	0
Bunchosia glandulifera (Jacq.) Kunth	0	0	0	0	0	0	0	0	0	0	0	0	0	0	0	0	0	0
Campomanesia phaea (O.Berg) Landrum	0	0	0	0	0	0	0	0	0	0	0	0	0	0	0	0	0	0
Capsicum sp.	0	0	0	0	0	0	0	0	0	0	0	0	0	0	0	0	0	0
Cecropia cf. pachystachya Trécul	0	0	0	0	0	0	0	0	0	0	0	0	0	0	0	0	0	0
Cecropia glaziovii Snethl.	0	0	0	0	0	0	0	0	0	0	0	0	0	0	0	0	0	0
Cecropia pachystachya Trécul	0	0	0	0	0	0	0	0	0	0	0	0	0	0	0	0	0	0
Cedrela fissilis Vell.	0	0	0	0	0	0	0	0	0	0	0	0	0	0	0	0	0	0
cf. Bathysa	0	0	0	0	0	0	0	0	0	0	0	0	0	0	0	0	0	0
cf. Furcraea foetida (L.) Haw.	0	0	0	0	0	0	0	0	0	0	0	0	0	0	0	0	0	0
cf. Pterocarpus rohrii Vahl	0	0	0	0	0	0	0	0	0	0	0	0	0	0	0	0	0	0
cf. Thoracocarpus bissectus (Vell.) Harling	0	0	0	0	0	0	0	0	0	0	0	1	0	0	0	0	0	1
Cichorium cf. intybus L.	0	0	0	0	0	0	0	0	0	0	0	0	0	0	0	0	0	0
Citrus reticulata Blanco	0	0	0	0	0	0	0	0	0	0	0	0	0	0	0	0	0	0
Citrus x limon (L.) Osbeck	0	0	0	0	0	0	0	0	0	0	0	0	0	0	0	0	0	0
Clidemia hirta (L.) D.Don	0	0	0	0	0	0	0	0	0	0	0	0	0	0	0	0	0	0
Coffea arabica L.	0	0	0	0	0	0	0	0	0	0	0	0	0	0	0	0	0	0
Colocasia esculenta (L.) Schott	0	0	0	0	0	0	0	0	0	0	0	0	0	0	0	0	0	0
Conyza cf. bonariensis (L.) Cronquist	0	0	0	0	0	0	0	0	0	0	0	0	0	0	0	0	0	0
Cordia sellowiana Cham.	0	0	0	0	0	0	0	0	0	0	0	0	0	0	0	0	0	0
Cordia sp.	0	0	0	0	0	0	0	0	0	0	0	0	0	0	0	0	0	0
Costus arabicus L.	0	0	0	0	0	0	0	0	0	0	0	0	0	0	0	0	0	0
Cryptocarya mandioccana Meisn.	0	0	0	0	0	0	0	0	0	0	0	0	0	0	0	0	0	0
Cryptocarya saligna Mez	0	0	0	0	0	0	0	0	0	0	0	0	0	0	0	0	0	0
Cupania oblongifolia Mart.	0	0	0	0	0	0	0	1	0	0	0	0	0	0	0	0	0	0
Cuphea carthagenensis (Jacq.) J.F.Macbr.	0	0	0	0	0	0	0	0	0	0	0	0	0	0	0	0	0	0
Curcuma longa L.	0	0	0	0	0	0	0	0	0	0	0	0	0	0	0	0	0	0
Cymbopogon citratus (DC.) Stapf	0	0	0	0	0	0	0	0	0	0	0	0	0	0	0	0	0	0
Cymbopogon nardus (L.)Rendle	0	0	0	0	0	0	0	0	0	0	0	0	0	0	0	0	0	0
Davilla rugosa Poir.	0	0	0	1	0	0	0	0	0	0	0	0	0	0	0	0	0	0
Dioscorea bulbifera L.	0	0	0	0	0	0	0	0	0	0	0	0	0	0	0	0	0	0
Dysphania ambrosioides (L.) Mosyakin & Clemants	0	0	0	0	0	0	0	0	0	0	0	0	0	0	0	0	0	0
Echinodorus grandiflorus (Cham. & Schltdl.) Micheli	0	0	0	0	0	0	0	0	0	0	0	0	0	0	0	0	0	0
Elaeocarpus cf. serratus L.	0	0	0	0	0	0	0	0	0	0	0	0	0	0	0	0	0	0
Emilia sonchifolia (L.) DC.	0	0	0	0	0	0	0	0	0	0	0	0	0	0	0	0	0	0
Erechtites valerianifolius (Wolf) DC.	0	0	0	0	0	0	0	0	0	0	0	0	0	0	0	0	0	0
Eryngium cf. coronatum Hook. & Arn.	0	0	0	0	0	0	0	0	0	0	0	0	0	0	0	0	0	0
Eryngium foetidum L	0	0	0	0	0	0	0	0	0	0	0	0	0	0	0	0	0	0
Erythroxylum pulchrum A.St.-Hil.	0	0	0	0	0	0	0	0	0	0	0	0	0	0	0	0	0	0
Eugenia astringens Cambess.	0	0	0	0	0	0	0	0	0	0	0	0	0	0	0	0	0	0
Eugenia brasiliensis Lam.	0	0	0	0	0	0	0	0	0	0	0	0	0	0	0	0	0	0
Eugenia cf. stipitata McVaugh	0	0	0	0	0	0	0	0	0	0	0	0	0	0	0	0	0	0
Eugenia uniflora L.	0	0	0	0	0	0	0	0	0	0	0	0	0	0	0	0	0	0
Euterpe edulis Mart.	0	0	0	0	0	0	0	0	0	0	0	1	1	0	0	0	0	0
Euterpe oleracea Mart.	0	0	0	0	0	0	0	0	0	0	0	0	0	0	0	0	0	0
Faramea hymenocalyx M.Gomes	0	0	0	0	0	0	0	0	0	0	0	0	0	0	0	0	0	0
Ficus adhatodifolia Schott	0	0	0	0	0	0	1	0	0	0	0	0	0	0	0	0	0	0
Foeniculum vulgare Mill.	0	0	0	0	0	0	0	0	0	0	0	0	0	0	0	0	0	0
Furcraea foetida (L.) Haw. [cf.]	0	0	0	0	0	0	0	0	0	0	0	0	0	0	0	0	0	0
Garcinia gardneriana (Planch. & Triana) Zappi	0	0	0	0	0	0	0	0	0	0	0	0	0	0	0	0	0	0
Geonoma elegans Mart.	0	0	0	0	0	0	0	0	0	0	0	0	0	0	0	0	0	0
Gossypium sp.	0	0	0	0	0	0	0	0	0	0	0	0	0	0	0	0	0	0
Guarea macrophylla Vahl	0	0	0	0	0	0	0	0	0	0	1	0	0	0	0	0	0	0
Guatteria australis A.St.-Hil.	0	0	0	0	0	0	0	0	0	0	0	0	0	0	0	0	0	0
Gymnanthemum amygdalinum (Delile) Sch.Bip. ex Walp.	0	0	0	0	0	0	0	0	0	0	0	0	0	0	0	0	0	0
Handroanthus albus (Cham.) Mattos	0	0	0	0	0	0	0	0	0	0	0	0	0	0	0	0	0	0
Hedychium coronarium J.Koenig	0	0	0	0	0	0	0	0	0	0	0	0	0	0	0	0	0	0
Huberia ovalifolia DC	0	0	0	0	0	0	0	0	0	0	0	0	0	0	0	0	0	0
Hyeronima alchorneoides Allemão	0	0	0	0	0	0	0	0	0	0	0	0	0	0	0	0	0	0
Hymenaea altissima Ducke	0	0	0	0	0	0	0	0	0	0	0	0	0	0	0	0	0	0
Hypochaeris chillensis (Kunth) Britton	0	0	0	0	0	0	0	0	0	0	0	0	0	0	0	0	0	0
Imperata sp.	0	0	0	0	0	0	0	0	0	0	0	0	0	0	0	0	0	0
Inga edulis Mart.	0	0	0	0	0	0	0	0	0	0	1	0	0	0	0	0	0	0
Inga marginata Willd.	0	0	0	0	0	0	0	0	0	0	0	0	0	0	0	0	0	0
Ipomoea batatas (L.) Lam.	0	0	0	0	0	0	0	0	0	0	0	0	0	0	0	0	0	0
Jacaranda puberula Cham.	0	0	0	0	0	0	0	0	0	0	0	0	0	0	0	0	0	0
Justicia pectoralis Jacq.	0	0	0	0	0	0	0	0	0	0	0	0	0	0	0	0	0	0
Lacistema lucidum Schnizl	0	0	0	0	0	0	0	0	0	0	0	0	0	0	0	0	0	0
Lactuca indica L.	0	0	0	0	0	0	0	0	0	0	0	0	0	0	0	0	0	0
Lippia alba (Mill.) N.E.Br. ex P.Wilson	0	0	0	0	0	0	0	0	0	0	0	0	0	0	0	0	0	0
Mabea piriri Aubl.	0	0	0	0	0	0	1	0	0	0	0	0	0	0	0	0	0	0
Manihot esculenta Crantz	0	0	0	0	0	0	0	0	0	0	0	0	0	0	0	0	0	0
Mentha sp.	0	0	0	0	0	0	0	0	0	0	0	0	0	0	0	0	0	0
Miconia cinnamomifolia (DC.) Naudin	0	0	0	0	0	0	0	0	0	0	0	0	0	0	0	0	0	0
Mikania laevigata Sch.Bip. ex Baker	0	0	0	0	0	0	0	0	0	0	0	0	0	0	0	0	0	0
Morus nigra L.	0	0	0	0	0	0	0	0	0	0	0	0	0	0	0	0	0	0
Myrcia neoriedeliana E.Lucas & C.E.Wilson	0	0	0	0	0	0	0	0	0	0	0	0	0	0	0	0	0	0
Myrcia spectabilis DC.	0	0	0	0	0	0	0	0	0	0	0	0	0	0	0	0	0	0
Myrciaria glazioviana (Kiaersk.) G.M.Barroso ex Sobral	0	0	0	0	0	0	0	0	0	0	0	0	0	0	0	0	0	0
Myrocarpus frondosus Allemão	0	0	0	0	0	0	0	0	0	0	0	0	0	0	0	0	0	0
Myrsine coriacea (Sw.) R.Br. ex Roem. & Schult.	0	0	0	0	0	0	0	1	0	0	0	0	0	0	0	0	0	0
Ocimum americanum L.	0	0	0	0	0	0	0	0	0	0	0	0	0	0	0	0	0	0
Ocimum campechianum Mill.	0	0	0	0	0	0	0	0	0	0	0	0	0	0	0	0	0	0
Ocimum gratissimum L.	0	0	0	0	0	0	0	0	0	0	0	0	0	0	0	0	0	0
Pachira glabra Pasq.	0	0	0	0	0	0	0	0	0	0	0	0	0	0	0	0	0	0
Pera glabrata (Schott) Poepp. ex Baill.	0	0	0	0	0	0	0	0	0	0	0	0	0	0	0	0	0	0
Pfaffia glomerata (Spreng.) Pedersen	0	0	0	0	0	0	0	0	0	0	0	0	0	0	0	0	0	0
Philodendron eximium Schott	0	0	0	0	0	0	0	0	0	0	0	1	0	0	0	0	0	1
Philodendron martianum Engl.	0	0	0	0	0	0	0	0	0	0	0	0	0	0	0	0	0	0
Phyllanthus niruri L.	0	0	0	0	0	0	0	0	0	0	0	0	0	0	0	0	0	0
Piper mollicomum Kunth	0	0	0	0	0	0	0	0	0	0	0	0	0	0	0	0	0	0
Piper scutifolium Yunck	0	0	0	0	0	0	0	0	0	0	0	0	0	0	0	0	0	0
Piptadenia gonoacantha (Mart.) J.F.Macbr.	0	0	0	0	0	0	0	0	0	0	0	0	0	0	0	0	0	0
Plantago australis Lam.	0	0	0	0	0	0	0	0	0	0	0	0	0	0	0	0	0	0
Plectranthus amboinicus (Lour.) Spreng.	0	0	0	0	0	0	0	0	0	0	0	0	0	0	0	0	0	0
Plectranthus barbatus Andrews	0	0	0	0	0	0	0	0	0	0	0	0	0	0	0	0	0	0
Plinia edulis (Vell.) Sobral	0	0	0	0	0	0	0	0	0	0	0	0	0	0	0	0	0	0
Polygala paniculata L.	0	0	0	0	0	0	0	0	0	0	0	0	0	0	0	0	0	0
Pouteria caimito (Ruiz & Pav.) Radlk.	0	0	0	0	0	0	0	0	0	0	0	0	0	0	0	0	0	0
Psidium cattleianum Sabine	0	0	0	1	0	0	1	0	0	0	0	0	0	0	0	0	0	0
Psidium guajava L.	0	0	0	0	0	0	0	0	0	0	0	0	0	0	0	0	0	0
Renealmia petasites Gagnep.	0	0	0	0	0	0	0	0	0	0	0	0	0	0	0	0	0	0
Ricinus communis L.	0	0	0	0	0	0	0	0	0	0	0	0	0	0	0	0	0	0
Rubus rosifolius Sm.	0	0	0	0	0	0	0	0	0	0	0	0	0	0	0	0	0	0
Rustia formosa (Cham. & Schltdl.) Klotzsch	0	0	0	0	0	0	0	0	0	1	0	0	0	0	0	0	0	0
Schinus terebinthifoliaRaddi	0	0	0	0	0	0	0	0	0	0	0	0	0	0	0	0	0	0
Schizolobium parahyba (Vell.) S.F.Blake	0	0	0	0	0	0	0	0	0	0	0	0	0	0	0	0	0	0
Sida planicaulis Cav.	0	0	0	0	0	0	0	1	0	0	0	0	0	0	0	0	0	0
Sida rhombifolia L.	0	0	0	0	0	0	0	0	0	1	0	0	0	0	0	0	0	0
Solanum americanum Mill.	0	0	0	0	0	0	0	0	0	0	0	0	0	0	0	0	0	0
Solanum capsicoides All.	0	0	0	0	0	0	0	0	0	0	0	0	0	0	0	0	0	0
Solanum pseudoquina A.St.-Hil.	0	0	0	0	0	0	0	1	0	0	1	0	0	0	0	0	0	0
Sorocea cf. guilleminiana Gaudich.	0	0	0	0	0	0	0	0	0	1	0	0	0	0	0	0	0	0
sp. 2 - Myrtaceae	0	0	0	0	0	0	0	0	0	0	0	0	0	0	0	0	0	0
Stachytarpheta cayennensis (Rich.) Vahl	0	0	0	0	0	0	0	0	0	0	0	0	0	0	0	0	0	0
Swartzia oblata R.S.Cowan	0	0	0	0	0	0	0	0	0	0	0	0	0	0	0	0	0	0
Swartzia simplex var. grandiflora (Raddi) R.S.Cowan	0	0	0	0	0	0	0	0	0	0	0	0	0	0	0	0	0	0
Syagrus pseudococos (Raddi) Glassman	0	0	0	0	0	0	0	0	0	0	0	1	0	0	0	0	0	0
Syzygium jambos (L.) Alston	0	0	0	0	0	0	0	0	0	0	0	0	0	0	0	0	0	0
Syzygium malaccense (L.) Merr. & L.M.Perry	0	0	0	0	0	0	0	0	0	0	0	0	0	0	0	0	0	0
Tabernaemontana laeta Mart.	0	0	0	0	0	0	0	0	0	0	1	0	0	0	0	0	0	0
Theobroma cacao L.	0	0	0	0	0	0	0	0	0	0	0	0	0	0	0	0	0	0
Typha domingensis Pers.	0	0	0	0	0	0	1	0	0	0	0	0	1	0	1	1	0	0
Urera baccifera (L.) Gaudich. ex Wedd.	0	0	0	0	0	0	0	0	0	0	0	0	0	0	0	0	0	0
Varronia curassavica Jacq.	0	0	0	0	0	0	0	0	0	0	0	0	0	0	0	0	0	0
Vernonanthura beyrichii (Less.) H.Rob.	0	0	0	0	0	0	0	0	0	0	0	0	0	0	0	0	0	0
Xanthosoma taioba E.G.Gonç.	0	0	0	0	0	0	0	0	0	0	0	0	0	0	0	0	0	0
Zanthoxylum rhoifolium Lam.	0	0	0	0	0	0	1	0	0	0	0	0	0	0	0	0	0	0
Aleurites moluccanus (L.) Willd	0	0	0	0	0	0	0	0	0	0	0	0	0	0	0	0	0	0
Allium chinense G. Don	0	0	0	0	0	0	0	0	0	0	0	0	0	0	0	0	0	0
Allium fistulosum L.	0	0	0	0	0	0	0	0	0	0	0	0	0	0	0	0	0	0
Allium tuberosum	0	0	0	0	0	0	0	0	0	0	0	0	0	0	0	0	0	0
Annona montana Macf.	0	0	0	0	0	0	0	0	0	0	0	0	0	0	0	0	0	0
Artocarpus heterophyllus Lam	0	0	0	0	0	0	0	0	0	0	0	0	0	0	0	0	0	0
Astrocaryum aculeatissimum (Schott) Burret	0	0	0	0	0	0	0	0	0	0	0	0	0	0	0	0	0	0
Bactris sp.	0	0	0	0	0	0	0	0	0	1	0	0	0	0	0	0	0	0
Cajanus cajan (L.) Huth	0	0	0	0	0	0	0	0	0	0	0	0	0	0	0	0	0	0
Citharexylum myrianthum Cham.	0	0	0	0	0	0	0	0	0	0	0	0	0	0	0	0	0	0
Citrus sinensis (L.) Osbeck	0	0	0	0	0	0	0	0	0	0	0	0	0	0	0	0	0	0
Dioscorea sp.	0	0	0	0	0	0	0	0	0	0	0	0	0	0	0	0	0	0
Ecclinusa ramiflora Mart.	0	0	0	0	0	0	1	1	0	0	0	0	0	0	0	0	0	0
Elephantopus mollis Kunth	0	0	0	0	0	0	0	0	0	0	0	0	0	0	0	0	0	0
Eugenia cf. multicostata D. Legrand	0	0	0	0	0	0	0	0	0	0	0	0	0	0	0	0	0	0
Eugenia sp.	0	0	0	0	0	0	0	0	0	0	0	0	0	0	0	0	0	0
Eugenia sulcata Spring ex Mart.	0	0	0	0	0	0	0	0	0	0	0	0	0	0	0	0	0	0
Inga cf. lenticellata Benth.	0	0	0	0	0	0	0	0	0	0	0	0	0	0	0	0	0	0
Jacaratia spinosa (Aubl.) A.DC.	0	0	0	0	0	0	0	0	0	0	0	0	0	0	0	0	0	0
Licania sp.2	0	0	0	0	0	0	0	0	0	0	0	0	0	0	0	0	0	0
Marantaceae sp.2	0	0	0	0	0	0	0	0	0	0	0	0	0	0	0	0	0	0
Miconia dodecandra Cogn.	0	0	0	0	0	0	0	0	0	0	0	0	0	0	0	0	0	0
Miconia prasina (Sw.) DC.	0	0	0	0	0	0	0	0	0	0	0	0	0	0	0	0	0	0
Micropholis crassipedicellata (Mart. & Eichler) Pierre	0	0	0	0	0	0	0	0	0	0	0	0	0	0	0	0	0	0
Mimusops coriacea (A.DC.) Miq.	0	0	0	0	0	0	0	0	0	0	0	0	0	0	0	0	0	0
Musa sp.	0	0	0	0	0	0	0	0	0	0	0	0	0	0	0	0	0	0
Nectandra oppositifolia Nees	0	0	0	0	0	0	1	0	0	0	0	0	0	0	0	0	0	0
Passiflora miersii Mast.	0	0	0	0	0	0	0	0	0	0	0	0	0	0	0	0	0	0
Persea americana Mill.	0	0	0	0	0	0	0	0	0	0	0	0	0	0	0	0	0	0
Phaseolus vulgaris L.	0	0	0	0	0	0	0	0	0	0	0	0	0	0	0	0	0	0
Plinia sp.	0	0	0	0	0	0	0	0	0	0	0	0	0	0	0	0	0	0
Rubus urticifolius Poir.	0	0	0	0	0	0	0	0	0	0	0	0	0	0	0	0	0	0
Solanum scuticum M.Nee	0	0	0	0	0	0	0	0	0	0	0	0	0	0	0	0	0	0
Tetrorchidium sp.	0	0	0	0	0	0	0	0	0	0	0	0	0	0	0	0	0	0
Trichilia silvatica C.DC.	0	0	0	0	0	0	0	0	0	0	0	0	0	0	0	0	0	0
Urera nitida (Vell.) P.Brack	0	0	0	0	0	0	0	0	0	0	0	0	0	0	0	0	0	0
Actinostemon verticillatus (Klotzsch) Baill.	0	0	0	0	0	0	1	0	0	0	0	0	0	0	0	0	0	0
Andira fraxinifolia Benth.	0	0	0	0	0	0	0	0	0	0	0	0	0	0	0	0	0	0
Brosimum guianense (Aubl.) Huber	0	0	0	0	0	0	0	0	0	0	0	0	0	0	0	0	0	0
Cabralea canjerana (Vell.) Mart.	0	0	0	0	0	0	0	0	0	0	0	0	0	0	0	0	0	0
Cariniana estrellensis (Raddi) Kuntze	0	0	0	0	0	0	0	0	0	0	0	0	0	0	0	0	0	0
cf. Hymenolobium janeirense Kuhlm.	0	0	0	0	0	0	0	1	0	0	0	0	0	0	0	0	0	0
Citharexylum myrianthum Cham.	0	0	0	0	0	0	0	0	0	0	0	0	0	0	0	0	0	0
Cordia sp.2	0	0	0	0	0	0	0	0	0	0	0	0	0	0	0	0	0	0
Eriotheca pentaphylla (Vell. & K.Schum.) A.Robyns	0	0	0	0	0	0	0	0	0	1	0	0	0	0	0	0	0	0
Geonoma sp.	0	0	0	0	0	0	1	0	0	0	0	0	0	0	0	0	0	0
Hedyosmum brasiliense Miq.	0	0	0	0	0	0	0	0	0	0	0	0	0	0	0	0	0	0
Inga sp	0	0	0	0	0	0	0	0	0	0	0	0	0	0	0	0	0	0
Pouteria sp.2	0	0	0	0	0	0	0	0	0	0	0	0	0	0	0	0	0	0
Schefflera cf. angustissima (Marchal) Frodin	0	0	0	0	0	0	1	0	0	0	0	0	0	0	0	0	0	0
Stylogyne lhotzkyana (A.DC.) Mez	0	0	0	0	0	0	0	0	0	0	0	0	0	0	0	0	0	0
Tachigali paratyensis (Vell.) H.C.Lima	0	0	0	0	0	0	0	0	0	0	0	0	0	0	0	0	0	0
Tachigali sp.1	0	0	0	0	0	0	0	0	0	0	0	0	0	0	0	0	0	0
Tachigali sp.2	0	0	0	0	0	0	0	0	0	0	0	0	0	0	0	0	0	0
Tibouchina pulchra Cogn.	0	0	0	0	0	0	0	0	0	0	0	0	0	0	0	0	0	0
Virola bicuhyba (Schott ex Spreng.) Warb.	0	0	0	0	0	0	1	0	0	0	0	0	0	0	0	0	0	0
Vitex polygama Cham.	0	0	0	0	0	0	0	0	0	0	0	0	0	0	0	0	0	0
Xylopia brasiliensis Spreng.	0	0	0	0	0	0	0	0	0	0	0	0	0	0	0	0	0	0
Cedrela cf. odorata L	0	0	0	0	0	0	0	0	0	0	0	0	0	0	0	0	0	0
Clusia criuva subsp. parviflora Vesque	0	0	0	0	0	0	1	0	0	0	0	0	0	0	0	0	0	0
Cordia sp.3	0	0	0	0	0	0	0	0	0	0	0	0	0	0	0	0	0	0
Ficus gomelleira Kunth & C.D.Bouché	0	0	0	0	0	0	0	0	0	0	0	0	0	0	0	0	0	0
Malouetia cestroides (Nees ex Mart.) Müll. Arg.	0	0	0	0	1	0	0	0	0	1	0	0	0	0	0	0	0	0
Pourouma guianensis Aubl.	0	0	0	0	0	0	0	0	0	0	0	0	0	0	0	0	0	0
Pouteria sp.1	0	0	0	0	0	0	0	0	0	0	0	0	0	0	0	0	0	0
Pseudopiptadenia leptostachya (Benth.) Rauschert	0	0	0	0	0	0	0	0	0	0	0	0	0	0	0	0	0	0
Tachigali sp.3	0	0	0	0	0	0	0	0	0	0	0	0	0	0	0	0	0	0
Borreria verticillata (L.) G.Mey.	0	0	0	0	0	0	0	0	0	1	0	0	0	0	0	0	0	0
Guapira nitida (Mart. ex J.A.Schmidt) Lundell	0	0	0	0	0	0	0	1	0	0	0	0	0	0	0	0	0	0
Maytenus ardisiaefolia Reissek	0	0	0	0	0	0	0	0	0	1	0	0	0	0	0	0	0	0
Merostachys argyronema Lindm.	1	1	1	0	0	0	0	1	0	0	0	0	0	0	0	0	0	0
Myrcia sp.2	0	0	0	0	0	0	0	1	0	0	0	0	0	0	0	0	0	0
Myrcia sp.3	0	0	0	0	0	0	1	0	0	0	0	0	0	0	0	0	0	0
Dalbergia frutescens (Vell.) Britton	0	0	0	0	0	0	0	0	0	0	0	0	0	0	0	0	0	0
Trema micranta (L.) Blume	0	0	0	0	0	0	0	0	0	0	0	0	0	0	0	0	0	0
Myrcia sp.1	0	0	0	0	0	0	0	0	0	0	0	0	0	0	0	0	0	0
Piper cernuum Vell.	0	0	0	0	0	0	0	0	0	0	0	0	0	0	0	0	0	0
Piper cf. gaudichaudianum Kunth	0	0	0	0	0	0	0	0	0	0	0	0	0	0	0	0	0	0
Canavalia ensiformis (L.) DC.	0	0	0	0	0	0	0	0	0	0	0	0	0	0	0	0	0	0
Ctenanthe lanceolata Petersen	0	0	0	0	0	0	0	0	0	0	0	0	0	0	0	0	0	0
Tephrosia candida (Roxb.) DC.	0	0	0	0	0	0	0	0	0	0	0	0	0	0	0	0	0	0
Cyrtocymura scorpioides (Lam.) H.Rob.	0	0	0	0	0	0	0	0	0	0	0	0	0	0	0	0	0	0
Achyrocline sp.1	0	0	0	0	0	0	0	0	0	0	0	0	0	0	0	0	0	0
Marantaceae sp.1	0	0	0	0	0	0	0	0	0	0	0	0	0	0	0	0	0	0
Aloysia gratissima (Gillies & Hook.) Tronc	0	0	0	0	0	0	0	0	0	0	0	0	0	0	0	0	0	0
Ruta graveolens L.	0	0	0	0	0	0	0	0	0	0	0	0	0	0	0	0	0	0
Sansevieria trifasciata Prain	0	0	0	0	0	0	0	0	0	0	0	0	0	0	0	0	0	0
Sansevieria trifasciata 'Laurentii	0	0	0	0	0	0	0	0	0	0	0	0	0	0	0	0	0	0
Petiveria alliacea L.	0	0	0	0	0	0	0	0	0	0	0	0	0	0	0	0	0	0
Tetradenia riparia (Hochst.) Codd	0	0	0	0	0	0	0	0	0	0	0	0	0	0	0	0	0	0
Gallesia integrifolia (Spreng.) Harms	0	0	0	0	0	0	0	0	0	0	0	0	0	0	0	0	0	0
Sambucus cf. canadensis	0	0	0	0	0	0	0	0	0	0	0	0	0	0	0	0	0	0
Scoparia dulcis L.	0	0	0	0	0	0	0	0	0	0	0	0	0	0	0	0	0	0

## Sheet: Ritualistics
community	cambury	cambury	cambury	cambury	cambury	cambury	cambury	cambury	cambury	cambury	fazenda	fazenda	fazenda	fazenda	fazenda	fazenda	fazenda	fazenda
informant	Alcides Jorge	Cremilda_da_Cruz_Catarina	Domingos	Eliete	Euclides_jr	Isac	José	Maximiano	Moises Firmino	Oziel Soares	Cirillio	Dn_Aparecida	Dn_Maria	Dn_onofria	Luciana_vieira	Maria_aparecida_vieira	Jose_vieira	vinturante_manoel
Achillea millefolium L.	0	0	0	0	0	0	0	0	0	0	0	0	0	0	0	0	0	0
Achyrocline flaccida(Weinm.) DC.	0	0	0	0	0	0	0	0	0	0	0	0	0	0	0	0	0	0
Aegiphila integrifolia (Jacq.) Moldenke	0	0	0	0	0	0	0	0	0	0	0	0	0	0	0	0	0	0
Ageratum conyzoides L.	0	0	0	0	0	0	0	0	0	0	0	0	0	1	0	0	0	0
Alternanthera brasiliana (L.) Kuntze	0	0	0	0	0	0	0	0	0	0	0	0	0	0	0	0	0	0
Amaranthus blitum L.	0	0	0	0	0	0	0	0	0	0	0	0	0	0	0	0	0	0
Anacardium occidentale L.	0	0	0	0	0	0	0	0	0	0	0	0	0	0	0	0	0	0
Aniba sp.	0	0	0	0	0	0	0	0	0	0	0	0	0	0	0	0	0	0
Annona dolabripetala Raddi	0	0	0	0	0	0	0	0	0	0	0	0	0	0	0	0	0	0
Annona muricata L.	0	0	0	0	0	0	0	0	0	0	0	0	0	0	0	0	0	0
Artocarpus altilis (Parkinson) Fosberg	0	0	0	0	0	0	0	0	0	0	0	0	0	0	0	0	0	0
Astrocaryum aculeatissimum (Schott) Burret	0	0	0	0	0	0	0	0	0	0	0	0	0	0	0	0	0	0
Baccharis sp. [Sect. Caulopterae DC.]	0	0	0	0	0	0	0	0	0	0	0	0	1	0	0	0	0	0
Bactris gasipaes Kunth	0	0	0	0	0	0	0	0	0	0	0	0	0	0	0	0	0	0
Bambusa cf. vulgaris Schrad. ex J.C.Wendl.	0	0	0	0	0	0	0	0	0	0	0	0	0	0	0	0	0	0
Bambusa sp.	0	0	0	0	0	0	0	0	0	0	0	0	0	0	0	0	0	0
Bathysa mendoncaei K.Schum.	0	0	0	0	0	0	0	0	0	0	0	0	0	0	0	0	0	0
Bidens pilosa L.	0	0	0	0	0	0	0	0	0	0	0	0	0	0	0	0	0	0
Bixa orellana L.	0	0	0	0	0	0	0	0	0	0	0	0	0	0	0	0	0	0
Brassica oleracea L. [Gr. Acephala]	0	0	0	0	0	0	0	0	0	0	0	0	0	0	0	0	0	0
Buchena viakleinii Exell	0	0	0	0	0	0	0	0	0	0	0	0	0	0	0	0	0	0
Bunchosia glandulifera (Jacq.) Kunth	0	0	0	0	0	0	0	0	0	0	0	0	0	0	0	0	0	0
Campomanesia phaea (O.Berg) Landrum	0	0	0	0	0	0	0	0	0	0	0	0	0	0	0	0	0	0
Capsicum sp.	0	0	0	0	0	0	0	0	0	0	0	0	1	0	0	0	0	0
Cecropia cf. pachystachya Trécul	0	0	0	0	0	0	0	0	0	0	0	0	0	0	0	0	0	0
Cecropia glaziovii Snethl.	0	0	0	0	0	0	0	0	0	0	0	0	0	0	0	0	0	0
Cecropia pachystachya Trécul	0	0	0	0	0	0	0	0	0	0	0	0	0	0	0	0	0	0
Cedrela fissilis Vell.	0	0	0	0	0	0	0	0	0	0	0	0	0	0	0	0	0	0
cf. Bathysa	0	0	0	0	0	0	0	0	0	0	0	0	0	0	0	0	0	0
cf. Furcraea foetida (L.) Haw.	0	0	0	0	0	0	0	0	0	0	0	0	0	0	0	0	0	0
cf. Pterocarpus rohrii Vahl	0	0	0	0	0	0	0	0	0	0	0	0	0	0	0	0	0	0
cf. Thoracocarpus bissectus (Vell.) Harling	0	0	0	0	0	0	0	0	0	0	0	0	0	0	0	0	0	0
Cichorium cf. intybus L.	0	0	0	0	0	0	0	0	0	0	0	0	0	0	0	0	0	0
Citrus reticulata Blanco	0	0	0	0	0	0	0	0	0	0	0	0	0	0	0	0	0	0
Citrus x limon (L.) Osbeck	0	0	0	0	0	0	0	0	0	0	0	0	0	0	0	0	0	0
Clidemia hirta (L.) D.Don	0	0	0	0	0	0	0	0	0	0	0	0	0	0	0	0	0	0
Coffea arabica L.	0	0	0	0	0	0	0	0	0	0	0	0	0	0	0	0	0	0
Colocasia esculenta (L.) Schott	0	0	0	0	0	0	0	0	0	0	0	0	0	0	0	0	0	0
Conyza cf. bonariensis (L.) Cronquist	0	0	0	0	0	0	0	0	0	0	0	0	0	0	0	0	0	0
Cordia sellowiana Cham.	0	0	0	0	0	0	0	0	0	0	0	0	0	0	0	0	0	0
Cordia sp.	0	0	0	0	0	0	0	0	0	0	0	0	0	0	0	0	0	0
Costus arabicus L.	0	0	0	0	0	0	0	0	0	0	0	0	0	0	0	0	0	0
Cryptocarya mandioccana Meisn.	0	0	0	0	0	0	0	0	0	0	0	0	0	1	1	0	0	0
Cryptocarya saligna Mez	0	0	0	0	0	0	0	0	0	0	0	0	0	0	0	0	0	0
Cupania oblongifolia Mart.	0	0	0	0	0	0	0	0	0	0	0	0	0	0	0	0	0	0
Cuphea carthagenensis (Jacq.) J.F.Macbr.	0	0	0	0	0	0	0	0	0	0	0	0	0	0	0	0	0	0
Curcuma longa L.	0	0	0	0	0	0	0	0	0	0	0	0	0	0	0	0	0	0
Cymbopogon citratus (DC.) Stapf	0	0	0	0	0	0	0	0	0	0	0	0	0	0	0	0	0	0
Cymbopogon nardus (L.)Rendle	0	0	0	0	0	0	0	0	0	0	0	0	0	0	0	0	0	0
Davilla rugosa Poir.	0	0	0	0	0	0	0	0	0	0	0	0	0	0	0	0	0	0
Dioscorea bulbifera L.	0	0	0	0	0	0	0	0	0	0	0	0	0	0	0	0	0	0
Dysphania ambrosioides (L.) Mosyakin & Clemants	0	0	0	0	0	0	0	0	0	0	0	0	0	0	0	0	0	0
Echinodorus grandiflorus (Cham. & Schltdl.) Micheli	0	0	0	0	0	0	0	0	0	0	0	0	0	0	0	0	0	0
Elaeocarpus cf. serratus L.	0	0	0	0	0	0	0	0	0	0	0	0	0	0	0	0	0	0
Emilia sonchifolia (L.) DC.	0	0	0	0	0	0	0	0	0	0	0	0	0	0	0	0	0	0
Erechtites valerianifolius (Wolf) DC.	0	0	0	0	0	0	0	0	0	0	0	0	0	0	0	0	0	0
Eryngium cf. coronatum Hook. & Arn.	0	0	0	0	0	0	0	0	0	0	0	0	0	0	0	0	0	0
Eryngium foetidum L	0	0	0	0	0	0	0	0	0	0	0	0	0	0	0	0	0	0
Erythroxylum pulchrum A.St.-Hil.	0	0	0	0	0	0	0	0	0	0	0	0	0	0	0	0	0	0
Eugenia astringens Cambess.	0	0	0	0	0	0	0	0	0	0	0	0	0	0	0	0	0	0
Eugenia brasiliensis Lam.	0	0	0	0	0	0	0	0	0	0	0	0	0	0	0	0	0	0
Eugenia cf. stipitata McVaugh	0	0	0	0	0	0	0	0	0	0	0	0	0	0	0	0	0	0
Eugenia uniflora L.	0	0	0	0	0	0	0	0	0	0	0	0	0	0	0	0	0	0
Euterpe edulis Mart.	0	0	0	0	0	0	0	0	0	0	0	0	0	0	0	0	0	0
Euterpe oleracea Mart.	0	0	0	0	0	0	0	0	0	0	0	0	0	0	0	0	0	0
Faramea hymenocalyx M.Gomes	0	0	0	0	0	0	0	0	0	0	0	0	0	0	0	0	0	0
Ficus adhatodifolia Schott	0	0	0	0	0	0	0	0	0	0	0	0	0	0	0	0	0	0
Foeniculum vulgare Mill.	0	0	0	0	0	0	0	0	0	0	0	0	0	0	0	0	0	0
Furcraea foetida (L.) Haw. [cf.]	0	0	0	0	0	0	0	0	0	0	0	0	0	0	0	0	0	0
Garcinia gardneriana (Planch. & Triana) Zappi	0	0	0	0	0	0	0	0	0	0	0	0	0	0	0	0	0	0
Geonoma elegans Mart.	0	0	0	0	0	0	0	0	0	0	0	0	0	0	0	0	0	0
Gossypium sp.	0	0	0	0	0	0	0	0	0	0	0	0	0	0	1	0	0	0
Guarea macrophylla Vahl	0	0	0	0	0	0	0	0	0	0	0	0	0	0	0	0	0	0
Guatteria australis A.St.-Hil.	0	0	0	0	0	0	0	0	0	0	0	0	0	0	0	0	0	0
Gymnanthemum amygdalinum (Delile) Sch.Bip. ex Walp.	0	0	0	0	0	0	0	0	0	0	0	0	0	0	0	0	0	0
Handroanthus albus (Cham.) Mattos	0	0	0	0	0	0	0	0	0	0	0	0	0	0	0	0	0	0
Hedychium coronarium J.Koenig	0	0	0	0	0	0	0	0	0	0	0	0	0	0	0	0	0	0
Huberia ovalifolia DC	0	0	0	0	0	0	0	0	0	0	0	0	0	0	0	0	0	0
Hyeronima alchorneoides Allemão	0	0	0	0	0	0	0	0	0	0	0	0	0	0	0	0	0	0
Hymenaea altissima Ducke	0	0	0	0	0	0	0	0	0	0	0	0	0	0	0	0	0	0
Hypochaeris chillensis (Kunth) Britton	0	0	0	0	0	0	0	0	0	0	0	0	0	0	0	0	0	0
Imperata sp.	0	0	0	0	0	0	0	0	0	0	0	0	0	0	0	0	0	0
Inga edulis Mart.	0	0	0	0	0	0	0	0	0	0	0	0	0	0	0	0	0	0
Inga marginata Willd.	0	0	0	0	0	0	0	0	0	0	0	0	0	0	0	0	0	0
Ipomoea batatas (L.) Lam.	0	0	0	0	0	0	0	0	0	0	0	0	0	0	0	0	0	0
Jacaranda puberula Cham.	0	0	0	0	0	0	0	0	0	0	0	0	0	0	0	0	0	0
Justicia pectoralis Jacq.	0	0	0	0	0	0	0	0	0	0	0	0	0	0	0	0	0	0
Lacistema lucidum Schnizl	0	0	0	0	0	0	0	0	0	0	0	0	0	0	0	0	0	0
Lactuca indica L.	0	0	0	0	0	0	0	0	0	0	0	0	0	0	0	0	0	0
Lippia alba (Mill.) N.E.Br. ex P.Wilson	0	0	0	0	0	0	0	0	0	0	0	0	0	0	0	0	0	0
Mabea piriri Aubl.	0	0	0	0	0	0	0	0	0	0	0	0	0	0	0	0	0	0
Manihot esculenta Crantz	0	0	0	0	0	0	0	0	0	0	0	0	0	0	0	0	0	0
Mentha sp.	0	0	0	0	0	0	0	0	0	0	0	0	0	0	0	0	0	0
Miconia cinnamomifolia (DC.) Naudin	0	0	0	0	0	0	0	0	0	0	0	0	0	0	0	0	0	0
Mikania laevigata Sch.Bip. ex Baker	0	0	0	0	0	0	0	0	0	0	0	0	0	0	0	0	0	0
Morus nigra L.	0	0	0	0	0	0	0	0	0	0	0	0	0	0	0	0	0	0
Myrcia neoriedeliana E.Lucas & C.E.Wilson	0	0	0	0	0	0	0	0	0	0	0	0	0	0	0	0	0	0
Myrcia spectabilis DC.	0	0	0	0	0	0	0	0	0	0	0	0	0	0	0	0	0	0
Myrciaria glazioviana (Kiaersk.) G.M.Barroso ex Sobral	0	0	0	0	0	0	0	0	0	0	0	0	0	0	0	0	0	0
Myrocarpus frondosus Allemão	0	0	0	0	0	0	0	0	0	0	0	0	0	0	0	0	0	0
Myrsine coriacea (Sw.) R.Br. ex Roem. & Schult.	0	0	0	0	0	0	0	0	0	0	0	0	0	0	0	0	0	0
Ocimum americanum L.	0	0	0	0	0	0	0	0	0	0	0	0	0	0	0	0	0	0
Ocimum campechianum Mill.	0	0	0	0	0	0	0	0	0	0	0	0	0	0	0	0	0	0
Ocimum gratissimum L.	0	0	0	0	0	0	0	0	0	0	0	0	0	0	0	0	0	0
Pachira glabra Pasq.	0	0	0	0	0	0	0	0	0	0	0	0	0	0	0	0	0	0
Pera glabrata (Schott) Poepp. ex Baill.	0	0	0	0	0	0	0	0	0	0	0	0	0	0	0	0	0	0
Pfaffia glomerata (Spreng.) Pedersen	0	0	0	0	0	0	0	0	0	0	0	0	0	0	0	0	0	0
Philodendron eximium Schott	0	0	0	0	0	0	0	0	0	0	0	0	0	0	0	0	0	0
Philodendron martianum Engl.	0	0	0	0	0	0	0	0	0	0	0	0	0	0	0	0	0	0
Phyllanthus niruri L.	0	0	0	0	0	0	0	0	0	0	0	0	0	0	0	0	0	0
Piper mollicomum Kunth	0	0	0	0	0	0	0	0	0	0	0	0	0	0	0	0	0	0
Piper scutifolium Yunck	0	0	0	0	0	0	0	0	0	0	0	0	0	0	0	0	0	0
Piptadenia gonoacantha (Mart.) J.F.Macbr.	0	0	0	0	0	0	0	0	0	0	0	0	0	0	0	0	0	0
Plantago australis Lam.	0	0	0	0	0	0	0	0	0	0	0	0	0	0	0	0	0	0
Plectranthus amboinicus (Lour.) Spreng.	0	0	0	0	0	0	0	0	0	0	0	0	0	0	0	0	0	0
Plectranthus barbatus Andrews	0	0	0	0	0	0	0	0	0	0	0	0	0	0	0	0	0	0
Plinia edulis (Vell.) Sobral	0	0	0	0	0	0	0	0	0	0	0	0	0	0	0	0	0	0
Polygala paniculata L.	0	0	0	0	0	0	0	0	0	0	0	0	0	0	0	0	0	0
Pouteria caimito (Ruiz & Pav.) Radlk.	0	0	0	0	0	0	0	0	0	0	0	0	0	0	0	0	0	0
Psidium cattleianum Sabine	0	0	0	0	0	0	0	0	0	0	0	0	0	0	0	0	0	0
Psidium guajava L.	0	0	0	0	0	0	0	0	0	0	0	0	0	0	0	0	0	0
Renealmia petasites Gagnep.	0	0	0	0	0	0	0	0	0	0	0	0	0	0	0	0	0	0
Ricinus communis L.	0	0	0	0	0	0	0	0	0	0	0	0	0	0	0	0	0	0
Rubus rosifolius Sm.	0	0	0	0	0	0	0	0	0	0	0	0	0	0	0	0	0	0
Rustia formosa (Cham. & Schltdl.) Klotzsch	0	0	0	0	0	0	0	0	0	0	0	0	0	0	0	0	0	0
Schinus terebinthifoliaRaddi	0	0	0	0	0	0	0	0	0	0	0	0	0	0	0	0	0	0
Schizolobium parahyba (Vell.) S.F.Blake	0	0	0	0	0	0	0	0	0	0	0	0	0	0	0	0	0	0
Sida planicaulis Cav.	0	0	0	0	0	0	0	0	0	0	0	0	0	0	0	0	1	0
Sida rhombifolia L.	0	0	0	0	0	0	0	0	0	0	0	0	0	0	0	0	1	0
Solanum americanum Mill.	0	0	0	0	0	0	0	0	0	0	0	0	0	0	0	0	0	0
Solanum capsicoides All.	0	0	0	0	0	0	0	0	0	0	0	0	0	0	0	0	0	0
Solanum pseudoquina A.St.-Hil.	0	0	0	0	0	0	0	0	0	0	0	0	0	0	0	0	0	0
Sorocea cf. guilleminiana Gaudich.	0	0	0	0	0	0	0	0	0	0	0	0	0	0	0	0	0	0
sp. 2 - Myrtaceae	0	0	0	0	0	0	0	0	0	0	0	0	0	0	0	0	0	0
Stachytarpheta cayennensis (Rich.) Vahl	0	0	0	0	0	0	0	0	0	0	0	0	0	0	0	0	0	0
Swartzia oblata R.S.Cowan	0	0	0	0	0	0	0	0	0	0	0	0	0	0	0	0	0	0
Swartzia simplex var. grandiflora (Raddi) R.S.Cowan	0	0	0	0	0	0	0	0	0	0	0	0	0	0	0	0	0	0
Syagrus pseudococos (Raddi) Glassman	0	0	0	0	0	0	0	0	0	0	0	0	0	0	0	0	0	0
Syzygium jambos (L.) Alston	0	0	0	0	0	0	0	0	0	0	0	0	0	0	0	0	0	0
Syzygium malaccense (L.) Merr. & L.M.Perry	0	0	0	0	0	0	0	0	0	0	0	0	0	0	0	0	0	0
Tabernaemontana laeta Mart.	0	0	0	0	0	0	0	0	0	0	0	0	0	0	0	0	0	0
Theobroma cacao L.	0	0	0	0	0	0	0	0	0	0	0	0	0	0	0	0	0	0
Typha domingensis Pers.	0	0	0	0	0	0	0	0	0	0	0	0	0	0	0	0	0	0
Urera baccifera (L.) Gaudich. ex Wedd.	0	0	0	0	0	0	0	0	0	0	0	0	0	0	0	0	0	0
Varronia curassavica Jacq.	0	0	0	0	0	0	0	0	0	0	0	0	0	0	0	0	0	0
Vernonanthura beyrichii (Less.) H.Rob.	0	0	0	0	0	0	0	0	0	0	0	0	1	0	0	0	1	0
Xanthosoma taioba E.G.Gonç.	0	0	0	0	0	0	0	0	0	0	0	0	0	0	0	0	0	0
Zanthoxylum rhoifolium Lam.	0	0	0	0	0	0	0	0	0	0	0	0	0	0	0	0	0	0
Aleurites moluccanus (L.) Willd	0	0	0	0	0	0	0	0	0	0	0	0	0	0	0	0	0	0
Allium chinense G. Don	0	0	0	0	0	0	0	0	0	0	0	0	0	0	0	0	0	0
Allium fistulosum L.	0	0	0	0	0	0	0	0	0	0	0	0	0	0	0	0	0	0
Allium tuberosum	0	0	0	0	0	0	0	0	0	0	0	0	0	0	0	0	0	0
Annona montana Macf.	0	0	0	0	0	0	0	0	0	0	0	0	0	0	0	0	0	0
Artocarpus heterophyllus Lam	0	0	0	0	0	0	0	0	0	0	0	0	0	0	0	0	0	0
Astrocaryum aculeatissimum (Schott) Burret	0	0	0	0	0	0	0	0	0	0	0	0	0	0	0	0	0	0
Bactris sp.	0	0	0	0	0	0	0	0	0	0	0	0	0	0	0	0	0	0
Cajanus cajan (L.) Huth	0	0	0	0	0	0	0	0	0	0	0	0	0	0	0	0	0	0
Citharexylum myrianthum Cham.	0	0	0	0	0	0	0	0	0	0	0	0	0	0	0	0	0	0
Citrus sinensis (L.) Osbeck	0	0	0	0	0	0	0	0	0	0	0	0	0	0	0	0	0	0
Dioscorea sp.	0	0	0	0	0	0	0	0	0	0	0	0	0	0	0	0	0	0
Ecclinusa ramiflora Mart.	0	0	0	0	0	0	0	0	0	0	0	0	0	0	0	0	0	0
Elephantopus mollis Kunth	0	0	0	0	0	0	0	0	0	0	0	0	0	0	0	0	0	0
Eugenia cf. multicostata D. Legrand	0	0	0	0	0	0	0	0	0	0	0	0	0	0	0	0	0	0
Eugenia sp.	0	0	0	0	0	0	0	0	0	0	0	0	0	0	0	0	0	0
Eugenia sulcata Spring ex Mart.	0	0	0	0	0	0	0	0	0	0	0	0	0	0	0	0	0	0
Inga cf. lenticellata Benth.	0	0	0	0	0	0	0	0	0	0	0	0	0	0	0	0	0	0
Jacaratia spinosa (Aubl.) A.DC.	0	0	0	0	0	0	0	0	0	0	0	0	0	0	0	0	0	0
Licania sp.2	0	0	0	0	0	0	0	0	0	0	0	0	0	0	0	0	0	0
Marantaceae sp.2	0	0	0	0	0	0	0	0	0	0	0	0	0	0	0	0	0	0
Miconia dodecandra Cogn.	0	0	0	0	0	0	0	0	0	0	0	0	0	0	0	0	0	0
Miconia prasina (Sw.) DC.	0	0	0	0	0	0	0	0	0	0	0	0	0	0	0	0	0	0
Micropholis crassipedicellata (Mart. & Eichler) Pierre	0	0	0	0	0	0	0	0	0	0	0	0	0	0	0	0	0	0
Mimusops coriacea (A.DC.) Miq.	0	0	0	0	0	0	0	0	0	0	0	0	0	0	0	0	0	0
Musa sp.	0	0	0	0	0	0	0	0	0	0	0	0	0	0	0	0	0	0
Nectandra oppositifolia Nees	0	0	0	0	0	0	0	0	0	0	0	0	0	0	0	0	0	0
Passiflora miersii Mast.	0	0	0	0	0	0	0	0	0	0	0	0	0	0	0	0	0	0
Persea americana Mill.	0	0	0	0	0	0	0	0	0	0	0	0	0	0	0	0	0	0
Phaseolus vulgaris L.	0	0	0	0	0	0	0	0	0	0	0	0	0	0	0	0	0	0
Plinia sp.	0	0	0	0	0	0	0	0	0	0	0	0	0	0	0	0	0	0
Rubus urticifolius Poir.	0	0	0	0	0	0	0	0	0	0	0	0	0	0	0	0	0	0
Solanum scuticum M.Nee	0	0	0	0	0	0	0	0	0	0	0	0	0	0	0	0	0	0
Tetrorchidium sp.	0	0	0	0	0	0	0	0	0	0	0	0	0	0	0	0	0	0
Trichilia silvatica C.DC.	0	0	0	0	0	0	0	0	0	0	0	0	0	0	0	0	0	0
Urera nitida (Vell.) P.Brack	0	0	0	0	0	0	0	0	0	0	0	0	0	0	0	0	0	0
Actinostemon verticillatus (Klotzsch) Baill.	0	0	0	0	0	0	0	0	0	0	0	0	0	0	0	0	0	0
Andira fraxinifolia Benth.	0	0	0	0	0	0	0	0	0	0	0	0	0	0	0	0	0	0
Brosimum guianense (Aubl.) Huber	0	0	0	0	0	0	0	0	0	0	0	0	0	0	0	0	0	0
Cabralea canjerana (Vell.) Mart.	0	0	0	0	0	0	0	0	0	0	0	0	0	0	0	0	0	0
Cariniana estrellensis (Raddi) Kuntze	0	0	0	0	0	0	0	0	0	0	0	0	0	0	0	0	0	0
cf. Hymenolobium janeirense Kuhlm.	0	0	0	0	0	0	0	0	0	0	0	0	0	0	0	0	0	0
Citharexylum myrianthum Cham.	0	0	0	0	0	0	0	0	0	0	0	0	0	0	0	0	0	0
Cordia sp.2	0	0	0	0	0	0	0	0	0	0	0	0	0	0	0	0	0	0
Eriotheca pentaphylla (Vell. & K.Schum.) A.Robyns	0	0	0	0	0	0	0	0	0	0	0	0	0	0	0	0	0	0
Geonoma sp.	0	0	0	0	0	0	0	0	0	0	0	0	0	0	0	0	0	0
Hedyosmum brasiliense Miq.	0	0	0	0	0	0	0	0	0	0	0	0	0	0	0	0	0	0
Inga sp	0	0	0	0	0	0	0	0	0	0	0	0	0	0	0	0	0	0
Pouteria sp.2	0	0	0	0	0	0	0	0	0	0	0	0	0	0	0	0	0	0
Schefflera cf. angustissima (Marchal) Frodin	0	0	0	0	0	0	0	0	0	0	0	0	0	0	0	0	0	0
Stylogyne lhotzkyana (A.DC.) Mez	0	0	0	0	0	0	0	0	0	0	0	0	0	0	0	0	0	0
Tachigali paratyensis (Vell.) H.C.Lima	0	0	0	0	0	0	0	0	0	0	0	0	0	0	0	0	0	0
Tachigali sp.1	0	0	0	0	0	0	0	0	0	0	0	0	0	0	0	0	0	0
Tachigali sp.2	0	0	0	0	0	0	0	0	0	0	0	0	0	0	0	0	0	0
Tibouchina pulchra Cogn.	0	0	0	0	0	0	0	0	0	0	0	0	0	0	0	0	0	0
Virola bicuhyba (Schott ex Spreng.) Warb.	0	0	0	0	0	0	0	0	0	0	0	0	0	0	0	0	0	0
Vitex polygama Cham.	0	0	0	0	0	0	0	0	0	0	0	0	0	0	0	0	0	0
Xylopia brasiliensis Spreng.	0	0	0	0	0	0	0	0	0	0	0	0	0	0	0	0	0	0
Cedrela cf. odorata L	0	0	0	0	0	0	0	0	0	0	0	0	0	0	0	0	0	0
Clusia criuva subsp. parviflora Vesque	0	0	0	0	0	0	0	0	0	0	0	0	0	0	0	0	0	0
Cordia sp.3	0	0	0	0	0	0	0	0	0	0	0	0	0	0	0	0	0	0
Ficus gomelleira Kunth & C.D.Bouché	0	0	0	0	0	0	0	0	0	0	0	0	0	0	0	0	0	0
Malouetia cestroides (Nees ex Mart.) Müll. Arg.	0	0	0	0	0	0	0	0	0	0	0	0	0	0	0	0	0	0
Pourouma guianensis Aubl.	0	0	0	0	0	0	0	0	0	0	0	0	0	0	0	0	0	0
Pouteria sp.1	0	0	0	0	0	0	0	0	0	0	0	0	0	0	0	0	0	0
Pseudopiptadenia leptostachya (Benth.) Rauschert	0	0	0	0	0	0	0	0	0	0	0	0	0	0	0	0	0	0
Tachigali sp.3	0	0	0	0	0	0	0	0	0	0	0	0	0	0	0	0	0	0
Borreria verticillata (L.) G.Mey.	0	0	0	0	0	0	0	0	0	0	0	0	0	0	0	0	0	0
Guapira nitida (Mart. ex J.A.Schmidt) Lundell	0	0	0	0	0	0	0	0	0	0	0	0	0	0	0	0	0	0
Maytenus ardisiaefolia Reissek	0	0	0	0	0	0	0	0	0	0	0	0	0	0	0	0	0	0
Merostachys argyronema Lindm.	0	0	0	0	0	0	0	0	0	0	0	0	0	0	0	0	0	0
Myrcia sp.2	0	0	0	0	0	0	0	0	0	0	0	0	0	0	0	0	0	0
Myrcia sp.3	0	0	0	0	0	0	0	0	0	0	0	0	0	0	0	0	0	0
Dalbergia frutescens (Vell.) Britton	0	0	0	0	0	0	0	0	0	0	0	0	0	0	0	0	0	0
Trema micranta (L.) Blume	0	0	0	0	0	0	0	0	0	0	0	0	0	0	0	0	0	0
Myrcia sp.1	0	0	0	0	0	0	0	0	0	0	0	0	0	0	0	0	0	0
Piper cernuum Vell.	0	0	0	0	0	0	0	0	0	0	0	0	0	0	0	0	0	0
Piper cf. gaudichaudianum Kunth	0	0	0	0	0	0	0	0	0	0	0	0	0	0	0	0	0	0
Canavalia ensiformis (L.) DC.	0	0	0	0	0	0	0	0	0	0	0	0	0	0	0	0	0	0
Ctenanthe lanceolata Petersen	0	0	0	0	0	0	0	0	0	0	0	0	0	0	0	0	0	0
Tephrosia candida (Roxb.) DC.	0	0	0	0	0	0	0	0	0	0	0	0	0	0	0	0	0	0
Cyrtocymura scorpioides (Lam.) H.Rob.	0	0	0	0	0	0	0	0	0	0	0	0	0	0	0	0	0	0
Achyrocline sp.1	0	0	0	0	0	0	0	0	0	0	0	0	0	0	0	0	0	0
Marantaceae sp.1	0	0	0	0	0	0	0	0	0	0	0	0	0	0	0	0	0	0
Aloysia gratissima (Gillies & Hook.) Tronc	0	0	0	0	0	0	0	0	0	0	0	0	1	0	0	0	1	0
Ruta graveolens L.	0	0	0	0	0	0		0	0	0	1	0	0	0	0	0	1	0
Sansevieria trifasciata Prain	0	0	0	0	0	0	0	0	0	0	0	0	1	0	0	0	0	0
Sansevieria trifasciata 'Laurentii	0	0	0	0	0	0	0	0	0	0	0	0	1	0	0	0	0	0
Petiveria alliacea L.	0	0	0	0	0	0	0	0	0	0	0	0	1	0	0	0	3	0
Tetradenia riparia (Hochst.) Codd	0	0	0	0	0	0	0	0	0	0	0	0	0	0	1	0	0	0
Gallesia integrifolia (Spreng.) Harms	0	0	0	0	0	0	0	0	0	0	0	0	0	0	0	0	1	0
Sambucus cf. canadensis	0	0	0	0	0	0	0	0	0	0	0	0	0	0	0	0	1	0
Scoparia dulcis L.	0	0	0	0	0	0	0	0	0	0	0	0	0	0	0	0	1	0

## Sheet: Ornamental
community	cambury	cambury	cambury	cambury	cambury	cambury	cambury	cambury	cambury	cambury	fazenda	fazenda	fazenda	fazenda	fazenda	fazenda	fazenda	fazenda
informant	Alcides Jorge	Cremilda_da_Cruz_Catarina	Domingos	Eliete	Euclides_jr	Isac	José	Maximiano	Moises Firmino	Oziel Soares	Cirillio	Dn_Aparecida	Dn_Maria	Dn_onofria	Luciana_vieira	Maria_aparecida_vieira	Jose_vieira	vinturante_manoel
Achillea millefolium L.	0	0	0	0	0	0	0	0	0	0	0	0	0	0	0	0	0	0
Achyrocline flaccida(Weinm.) DC.	0	0	0	0	0	0	0	0	0	0	0	0	0	0	0	0	0	0
Aegiphila integrifolia (Jacq.) Moldenke	0	0	0	0	0	0	0	0	0	0	0	0	0	0	0	0	0	0
Ageratum conyzoides L.	0	0	0	0	0	0	0	0	0	0	0	0	0	0	0	0	0	0
Alternanthera brasiliana (L.) Kuntze	0	0	0	0	0	0	0	0	0	0	0	0	0	0	0	0	0	0
Amaranthus blitum L.	0	0	0	0	0	0	0	0	0	0	0	0	0	0	0	0	0	0
Anacardium occidentale L.	0	0	0	0	0	0	0	0	0	0	0	0	0	0	0	0	0	0
Aniba sp.	0	0	0	0	0	0	0	0	0	0	0	0	0	0	0	0	0	0
Annona dolabripetala Raddi	0	0	0	0	0	0	0	0	0	0	0	0	0	0	0	0	0	0
Annona muricata L.	0	0	0	0	0	0	0	0	0	0	0	0	0	0	0	0	0	0
Artocarpus altilis (Parkinson) Fosberg	0	0	0	0	0	0	0	0	0	0	0	0	0	0	0	0	0	0
Astrocaryum aculeatissimum (Schott) Burret	0	0	0	0	0	0	0	0	0	0	0	0	0	0	0	0	0	0
Baccharis sp. [Sect. Caulopterae DC.]	0	0	0	0	0	0	0	0	0	0	0	0	0	0	0	0	0	0
Bactris gasipaes Kunth	0	0	0	0	0	0	0	0	0	0	0	0	0	0	0	0	0	0
Bambusa cf. vulgaris Schrad. ex J.C.Wendl.	0	0	0	0	0	0	0	0	0	0	0	0	0	0	0	0	0	0
Bambusa sp.	0	0	0	0	0	0	0	0	0	0	0	0	0	0	0	0	0	0
Bathysa mendoncaei K.Schum.	0	0	0	0	0	0	0	0	0	0	0	0	0	0	0	0	0	0
Bidens pilosa L.	0	0	0	0	0	0	0	0	0	0	0	0	0	0	0	0	0	0
Bixa orellana L.	0	0	0	0	0	0	0	0	0	0	0	0	0	0	0	0	0	0
Brassica oleracea L. [Gr. Acephala]	0	0	0	0	0	0	0	0	0	0	0	0	0	0	0	0	0	0
Buchena viakleinii Exell	0	0	0	0	0	0	0	0	0	0	0	0	0	0	0	0	0	0
Bunchosia glandulifera (Jacq.) Kunth	0	0	0	0	0	0	0	0	0	0	0	0	0	0	0	0	0	0
Campomanesia phaea (O.Berg) Landrum	0	0	0	0	0	0	0	0	0	0	0	0	0	0	0	0	0	0
Capsicum sp.	0	0	0	0	0	0	0	0	0	0	0	0	0	0	0	0	0	0
Cecropia cf. pachystachya Trécul	0	0	0	0	0	0	0	0	0	0	0	0	0	0	0	0	0	0
Cecropia glaziovii Snethl.	0	0	0	0	0	0	0	0	0	0	0	0	0	0	0	0	0	0
Cecropia pachystachya Trécul	0	0	0	0	0	0	0	0	0	0	0	0	0	0	0	0	0	0
Cedrela fissilis Vell.	0	0	0	0	0	0	0	0	0	0	0	0	0	0	0	0	0	0
cf. Bathysa	0	0	0	0	0	0	0	0	0	0	0	0	0	0	0	0	0	0
cf. Furcraea foetida (L.) Haw.	0	0	0	0	0	0	0	0	0	0	0	0	0	0	0	0	0	0
cf. Pterocarpus rohrii Vahl	0	0	0	0	0	0	0	0	0	0	0	0	0	0	0	0	0	0
cf. Thoracocarpus bissectus (Vell.) Harling	0	0	0	0	0	0	0	0	0	0	0	0	0	0	0	0	0	0
Cichorium cf. intybus L.	0	0	0	0	0	0	0	0	0	0	0	0	0	0	0	0	0	0
Citrus reticulata Blanco	0	0	0	0	0	0	0	0	0	0	0	0	0	0	0	0	0	0
Citrus x limon (L.) Osbeck	0	0	0	0	0	0	0	0	0	0	0	0	0	0	0	0	0	0
Clidemia hirta (L.) D.Don	0	0	0	0	0	0	0	0	0	0	0	0	0	0	0	0	0	0
Coffea arabica L.	0	0	0	0	0	0	0	0	0	0	0	0	0	0	0	0	0	0
Colocasia esculenta (L.) Schott	0	0	0	0	0	0	0	0	0	0	0	0	0	0	0	0	0	0
Conyza cf. bonariensis (L.) Cronquist	0	0	0	0	0	0	0	0	0	0	0	0	0	0	0	0	0	0
Cordia sellowiana Cham.	0	0	0	0	0	0	0	0	0	0	0	0	0	0	0	0	0	0
Cordia sp.	0	0	0	0	0	0	0	0	0	0	0	0	0	0	0	0	0	0
Costus arabicus L.	0	0	0	0	0	0	0	0	0	0	0	0	0	0	0	0	0	0
Cryptocarya mandioccana Meisn.	0	0	0	0	0	0	0	0	0	0	0	0	0	0	0	0	0	0
Cryptocarya saligna Mez	0	0	0	0	0	0	0	0	0	0	0	0	0	0	0	0	0	0
Cupania oblongifolia Mart.	0	0	0	0	0	0	0	0	0	0	0	0	0	0	0	0	0	0
Cuphea carthagenensis (Jacq.) J.F.Macbr.	0	0	0	0	0	0	0	0	0	0	0	0	0	0	0	0	0	0
Curcuma longa L.	0	0	0	0	0	0	0	0	0	0	0	0	0	0	0	0	0	0
Cymbopogon citratus (DC.) Stapf	0	0	0	0	0	0	0	0	0	0	0	0	0	0	0	0	0	0
Cymbopogon nardus (L.)Rendle	0	0	0	0	0	0	0	0	0	0	0	0	0	0	0	0	0	0
Davilla rugosa Poir.	0	0	0	0	0	0	0	0	0	0	0	0	0	0	0	0	0	0
Dioscorea bulbifera L.	0	0	0	0	0	0	0	0	0	0	0	0	0	0	0	0	0	0
Dysphania ambrosioides (L.) Mosyakin & Clemants	0	0	0	0	0	0	0	0	0	0	0	0	0	0	0	0	0	0
Echinodorus grandiflorus (Cham. & Schltdl.) Micheli	0	0	0	0	0	0	0	0	0	0	0	0	0	0	0	0	0	0
Elaeocarpus cf. serratus L.	0	0	0	0	0	0	0	0	0	0	0	0	0	0	0	0	0	0
Emilia sonchifolia (L.) DC.	0	0	0	0	0	0	0	0	0	0	0	0	0	0	0	0	0	0
Erechtites valerianifolius (Wolf) DC.	0	0	0	0	0	0	0	0	0	0	0	0	0	0	0	0	0	0
Eryngium cf. coronatum Hook. & Arn.	0	0	0	0	0	0	0	0	0	0	0	0	0	0	0	0	0	0
Eryngium foetidum L	0	0	0	0	0	0	0	0	0	0	0	0	0	0	0	0	0	0
Erythroxylum pulchrum A.St.-Hil.	0	0	0	0	0	0	0	0	0	0	0	0	0	0	0	0	0	0
Eugenia astringens Cambess.	0	0	0	0	0	0	0	0	0	0	0	0	0	0	0	0	0	0
Eugenia brasiliensis Lam.	0	0	0	0	0	0	0	0	0	0	0	0	0	0	0	0	0	0
Eugenia cf. stipitata McVaugh	0	0	0	0	0	0	0	0	0	0	0	0	0	0	0	0	0	0
Eugenia uniflora L.	0	0	0	0	0	0	0	0	0	0	0	0	0	0	0	0	0	0
Euterpe edulis Mart.	0	0	0	0	0	0	0	0	0	0	0	0	0	0	0	0	0	0
Euterpe oleracea Mart.	0	0	0	0	0	0	0	0	0	0	0	0	0	0	0	0	0	0
Faramea hymenocalyx M.Gomes	0	0	0	0	0	0	0	0	0	0	0	0	0	0	0	0	0	0
Ficus adhatodifolia Schott	0	0	0	0	0	0	0	0	0	0	0	0	0	0	0	0	0	0
Foeniculum vulgare Mill.	0	0	0	0	0	0	0	0	0	0	0	0	0	0	0	0	0	0
Furcraea foetida (L.) Haw. [cf.]	0	0	0	0	0	0	0	0	0	0	0	0	0	0	0	0	0	0
Garcinia gardneriana (Planch. & Triana) Zappi	0	0	0	0	0	0	0	0	0	0	0	0	0	0	0	0	0	0
Geonoma elegans Mart.	0	0	0	0	0	0	0	0	0	0	0	0	0	0	0	0	0	0
Gossypium sp.	0	0	0	0	0	0	0	0	0	0	0	0	0	0	0	0	0	0
Guarea macrophylla Vahl	0	0	0	0	0	0	0	0	0	0	0	0	0	0	0	0	0	0
Guatteria australis A.St.-Hil.	0	0	0	0	0	0	0	0	0	0	0	0	0	0	0	0	0	0
Gymnanthemum amygdalinum (Delile) Sch.Bip. ex Walp.	0	0	0	0	0	0	0	0	0	0	0	0	0	0	0	0	0	0
Handroanthus albus (Cham.) Mattos	0	0	0	0	0	0	0	0	0	0	0	0	0	0	0	0	0	0
Hedychium coronarium J.Koenig	0	0	0	0	0	0	0	0	0	0	0	0	0	0	0	0	0	0
Huberia ovalifolia DC	0	0	0	0	0	0	0	0	0	0	0	0	0	0	0	0	0	0
Hyeronima alchorneoides Allemão	0	0	0	0	0	0	0	0	0	0	0	0	0	0	0	0	0	0
Hymenaea altissima Ducke	0	0	0	0	0	0	0	0	0	0	0	0	0	0	0	0	0	0
Hypochaeris chillensis (Kunth) Britton	0	0	0	0	0	0	0	0	0	0	0	0	0	0	0	0	0	0
Imperata sp.	0	0	0	0	0	0	0	0	0	0	0	0	0	0	0	0	0	0
Inga edulis Mart.	0	0	0	0	0	0	0	0	0	0	0	0	0	0	0	0	0	0
Inga marginata Willd.	0	0	0	0	0	0	0	0	0	0	0	0	0	0	0	0	0	0
Ipomoea batatas (L.) Lam.	0	0	0	0	0	0	0	0	0	0	0	0	0	0	0	0	0	0
Jacaranda puberula Cham.	0	0	0	0	0	0	0	0	0	0	0	0	0	0	0	0	0	0
Justicia pectoralis Jacq.	0	0	0	0	0	0	0	0	0	0	0	0	0	0	0	0	0	0
Lacistema lucidum Schnizl	0	0	0	0	0	0	0	0	0	0	0	0	0	0	0	0	0	0
Lactuca indica L.	0	0	0	0	0	0	0	0	0	0	0	0	0	0	0	0	0	0
Lippia alba (Mill.) N.E.Br. ex P.Wilson	0	0	0	0	0	0	0	0	0	0	0	0	0	0	0	0	0	0
Mabea piriri Aubl.	0	0	0	0	0	0	0	0	0	0	0	0	0	0	0	0	0	0
Manihot esculenta Crantz	0	0	0	0	0	0	0	0	0	0	0	0	0	0	0	0	0	0
Mentha sp.	0	0	0	0	0	0	0	0	0	0	0	0	0	0	0	0	0	0
Miconia cinnamomifolia (DC.) Naudin	0	0	0	0	0	0	0	0	0	0	0	0	0	0	0	0	0	0
Mikania laevigata Sch.Bip. ex Baker	0	0	0	0	0	0	0	0	0	0	0	0	0	0	0	0	0	0
Morus nigra L.	0	0	0	0	0	0	0	0	0	0	0	0	0	0	0	0	0	0
Myrcia neoriedeliana E.Lucas & C.E.Wilson	0	0	0	0	0	0	0	0	0	0	0	0	0	0	0	0	0	0
Myrcia spectabilis DC.	0	0	0	0	0	0	0	0	0	0	0	0	0	0	0	0	0	0
Myrciaria glazioviana (Kiaersk.) G.M.Barroso ex Sobral	0	0	0	0	0	0	0	0	0	0	0	0	0	0	0	0	0	0
Myrocarpus frondosus Allemão	0	0	0	0	0	0	0	0	0	0	0	0	0	0	0	0	0	0
Myrsine coriacea (Sw.) R.Br. ex Roem. & Schult.	0	0	0	0	0	0	0	0	0	0	0	0	0	0	0	0	0	0
Ocimum americanum L.	0	0	0	0	0	0	0	0	0	0	0	0	0	0	0	0	0	0
Ocimum campechianum Mill.	0	0	0	0	0	0	0	0	0	0	0	0	0	0	0	0	0	0
Ocimum gratissimum L.	0	0	0	0	0	0	0	0	0	0	0	0	0	0	0	0	0	0
Pachira glabra Pasq.	0	0	0	0	0	0	0	0	0	0	0	0	0	0	0	0	0	0
Pera glabrata (Schott) Poepp. ex Baill.	0	0	0	0	0	0	0	0	0	0	0	0	0	0	0	0	0	0
Pfaffia glomerata (Spreng.) Pedersen	0	0	0	0	0	0	0	0	0	0	0	0	0	0	0	0	0	0
Philodendron eximium Schott	0	0	0	0	0	0	0	0	0	0	0	0	0	0	0	0	0	0
Philodendron martianum Engl.	0	0	0	0	0	0	0	0	0	0	0	0	0	0	0	0	0	0
Phyllanthus niruri L.	0	0	0	0	0	0	0	0	0	0	0	0	0	0	0	0	0	0
Piper mollicomum Kunth	0	0	0	0	0	0	0	0	0	0	0	0	0	0	0	0	0	0
Piper scutifolium Yunck	0	0	0	0	0	0	0	0	0	0	0	0	0	0	0	0	0	0
Piptadenia gonoacantha (Mart.) J.F.Macbr.	0	0	0	0	0	0	0	0	0	0	0	0	0	0	0	0	0	0
Plantago australis Lam.	0	0	0	0	0	0	0	0	0	0	0	0	0	0	0	0	0	0
Plectranthus amboinicus (Lour.) Spreng.	0	0	0	0	0	0	0	0	0	0	0	0	0	0	0	0	0	0
Plectranthus barbatus Andrews	0	0	0	0	0	0	0	0	0	0	0	0	0	0	0	0	0	0
Plinia edulis (Vell.) Sobral	0	0	0	0	0	0	0	0	0	0	0	0	0	0	0	0	0	0
Polygala paniculata L.	0	0	0	0	0	0	0	0	0	0	0	0	0	0	0	0	0	0
Pouteria caimito (Ruiz & Pav.) Radlk.	0	0	0	0	0	0	0	0	0	0	0	0	0	0	0	0	0	0
Psidium cattleianum Sabine	0	0	0	0	0	0	0	0	0	0	0	0	0	0	0	0	0	0
Psidium guajava L.	0	0	0	0	0	0	0	0	0	0	0	0	0	0	0	0	0	0
Renealmia petasites Gagnep.	0	0	0	0	0	0	0	1	0	0	0	0	0	0	0	0	0	0
Ricinus communis L.	0	0	0	0	0	0	0	0	0	0	0	0	0	0	0	0	0	0
Rubus rosifolius Sm.	0	0	0	0	0	0	0	0	0	0	0	0	0	0	0	0	0	0
Rustia formosa (Cham. & Schltdl.) Klotzsch	0	0	0	0	0	0	0	0	0	0	0	0	0	0	0	0	0	0
Schinus terebinthifoliaRaddi	0	0	0	0	0	0	0	0	0	0	0	0	0	0	0	0	0	0
Schizolobium parahyba (Vell.) S.F.Blake	0	0	0	0	0	0	0	0	0	0	0	0	0	0	0	0	0	0
Sida planicaulis Cav.	0	0	0	0	0	0	0	0	0	0	0	0	0	0	0	0	0	0
Sida rhombifolia L.	0	0	0	0	0	0	0	0	0	0	0	0	0	0	0	0	0	0
Solanum americanum Mill.	0	0	0	0	0	0	0	0	0	0	0	0	0	0	0	0	0	0
Solanum capsicoides All.	0	0	0	0	0	0	0	0	0	0	0	0	0	0	0	0	0	0
Solanum pseudoquina A.St.-Hil.	0	0	0	0	0	0	0	0	0	0	0	0	0	0	0	0	0	0
Sorocea cf. guilleminiana Gaudich.	0	0	0	0	0	0	0	0	0	0	0	0	0	0	0	0	0	0
sp. 2 - Myrtaceae	0	0	0	0	0	0	0	0	0	0	0	0	0	0	0	0	0	0
Stachytarpheta cayennensis (Rich.) Vahl	0	0	0	0	0	0	0	0	0	0	0	0	0	0	0	0	0	0
Swartzia oblata R.S.Cowan	0	0	0	0	0	0	0	0	0	0	0	0	0	0	0	0	0	0
Swartzia simplex var. grandiflora (Raddi) R.S.Cowan	0	0	0	0	0	0	0	0	0	0	0	0	0	0	0	0	0	0
Syagrus pseudococos (Raddi) Glassman	0	0	0	0	0	0	0	0	0	0	0	0	0	0	0	0	0	0
Syzygium jambos (L.) Alston	0	0	0	0	0	0	0	0	0	0	0	0	0	0	0	0	0	0
Syzygium malaccense (L.) Merr. & L.M.Perry	0	0	0	0	0	0	0	0	0	0	0	0	0	0	0	0	0	0
Tabernaemontana laeta Mart.	0	0	0	0	0	0	0	0	0	0	0	0	0	0	0	0	0	0
Theobroma cacao L.	0	0	0	0	0	0	0	0	0	0	0	0	0	0	0	0	0	0
Typha domingensis Pers.	0	0	0	0	0	0	0	0	0	0	0	0	0	0	0	0	0	0
Urera baccifera (L.) Gaudich. ex Wedd.	0	0	0	0	0	0	0	0	0	0	0	0	0	0	0	0	0	0
Varronia curassavica Jacq.	0	0	0	0	0	0	0	0	0	0	0	0	0	0	0	0	0	0
Vernonanthura beyrichii (Less.) H.Rob.	0	0	0	0	0	0	0	0	0	0	0	0	0	0	0	0	0	0
Xanthosoma taioba E.G.Gonç.	0	0	0	0	0	0	0	0	0	0	0	0	0	0	0	0	0	0
Zanthoxylum rhoifolium Lam.	0	0	0	0	0	0	0	0	0	0	0	0	0	0	0	0	0	0
Aleurites moluccanus (L.) Willd	0	0	0	0	0	0	0	0	0	0	0	0	0	0	0	0	0	0
Allium chinense G. Don	0	0	0	0	0	0	0	0	0	0	0	0	0	0	0	0	0	0
Allium fistulosum L.	0	0	0	0	0	0	0	0	0	0	0	0	0	0	0	0	0	0
Allium tuberosum	0	0	0	0	0	0	0	0	0	0	0	0	0	0	0	0	0	0
Annona montana Macf.	0	0	0	0	0	0	0	0	0	0	0	0	0	0	0	0	0	0
Artocarpus heterophyllus Lam	0	0	0	0	0	0	0	0	0	0	0	0	0	0	0	0	0	0
Astrocaryum aculeatissimum (Schott) Burret	0	0	0	0	0	0	0	0	0	0	0	0	0	0	0	0	0	0
Bactris sp.	0	0	0	0	0	0	0	0	0	0	0	0	0	0	0	0	0	0
Cajanus cajan (L.) Huth	0	0	0	0	0	0	0	0	0	0	0	0	0	0	0	0	0	0
Citharexylum myrianthum Cham.	0	0	0	0	0	0	0	0	0	0	0	0	0	0	0	0	0	0
Citrus sinensis (L.) Osbeck	0	0	0	0	0	0	0	0	0	0	0	0	0	0	0	0	0	0
Dioscorea sp.	0	0	0	0	0	0	0	0	0	0	0	0	0	0	0	0	0	0
Ecclinusa ramiflora Mart.	0	0	0	0	0	0	0	0	0	0	0	0	0	0	0	0	0	0
Elephantopus mollis Kunth	0	0	0	0	0	0	0	0	0	0	0	0	0	0	0	0	0	0
Eugenia cf. multicostata D. Legrand	0	0	0	0	0	0	0	0	0	0	0	0	0	0	0	0	0	0
Eugenia sp.	0	0	0	0	0	0	0	0	0	0	0	0	0	0	0	0	0	0
Eugenia sulcata Spring ex Mart.	0	0	0	0	0	0	0	0	0	0	0	0	0	0	0	0	0	0
Inga cf. lenticellata Benth.	0	0	0	0	0	0	0	0	0	0	0	0	0	0	0	0	0	0
Jacaratia spinosa (Aubl.) A.DC.	0	0	0	0	0	0	0	0	0	0	0	0	0	0	0	0	0	0
Licania sp.2	0	0	0	0	0	0	0	0	0	0	0	0	0	0	0	0	0	0
Marantaceae sp.2	0	0	0	0	0	0	0	0	0	0	0	0	0	0	0	0	0	0
Miconia dodecandra Cogn.	0	0	0	0	0	0	0	0	0	0	0	0	0	0	0	0	0	0
Miconia prasina (Sw.) DC.	0	0	0	0	0	0	0	0	0	0	0	0	0	0	0	0	0	0
Micropholis crassipedicellata (Mart. & Eichler) Pierre	0	0	0	0	0	0	0	0	0	0	0	0	0	0	0	0	0	0
Mimusops coriacea (A.DC.) Miq.	0	0	0	0	0	0	0	0	0	0	0	0	0	0	0	0	0	0
Musa sp.	0	0	0	0	0	0	0	0	0	0	0	0	0	0	0	0	0	0
Nectandra oppositifolia Nees	0	0	0	0	0	0	0	0	0	0	0	0	0	0	0	0	0	0
Passiflora miersii Mast.	0	0	0	0	0	0	0	0	0	0	0	0	0	0	0	0	0	0
Persea americana Mill.	0	0	0	0	0	0	0	0	0	0	0	0	0	0	0	0	0	0
Phaseolus vulgaris L.	0	0	0	0	0	0	0	0	0	0	0	0	0	0	0	0	0	0
Plinia sp.	0	0	0	0	0	0	0	0	0	0	0	0	0	0	0	0	0	0
Rubus urticifolius Poir.	0	0	0	0	0	0	0	0	0	0	0	0	0	0	0	0	0	0
Solanum scuticum M.Nee	0	0	0	0	0	0	0	0	0	0	0	0	0	0	0	0	0	0
Tetrorchidium sp.	0	0	0	0	0	0	0	0	0	0	0	0	0	0	0	0	0	0
Trichilia silvatica C.DC.	0	0	0	0	0	0	0	0	0	0	0	0	0	0	0	0	0	0
Urera nitida (Vell.) P.Brack	0	0	0	0	0	0	0	0	0	0	0	0	0	0	0	0	0	0
Actinostemon verticillatus (Klotzsch) Baill.	0	0	0	0	0	0	0	0	0	0	0	0	0	0	0	0	0	0
Andira fraxinifolia Benth.	0	0	0	0	0	0	0	0	0	0	0	0	0	0	0	0	0	0
Brosimum guianense (Aubl.) Huber	0	0	0	0	0	0	0	0	0	0	0	0	0	0	0	0	0	0
Cabralea canjerana (Vell.) Mart.	0	0	0	0	0	0	0	0	0	0	0	0	0	0	0	0	0	0
Cariniana estrellensis (Raddi) Kuntze	0	0	0	0	0	0	0	0	0	0	0	0	0	0	0	0	0	0
cf. Hymenolobium janeirense Kuhlm.	0	0	0	0	0	0	0	0	0	0	0	0	0	0	0	0	0	0
Citharexylum myrianthum Cham.	0	0	0	0	0	0	0	0	0	0	0	0	0	0	0	0	0	0
Cordia sp.2	0	0	0	0	0	0	0	0	0	0	0	0	0	0	0	0	0	0
Eriotheca pentaphylla (Vell. & K.Schum.) A.Robyns	0	0	0	0	0	0	0	0	0	0	0	0	0	0	0	0	0	0
Geonoma sp.	0	0	0	0	0	0	0	0	0	0	0	0	0	0	0	0	0	0
Hedyosmum brasiliense Miq.	0	0	0	0	0	0	0	0	0	0	0	0	0	0	0	0	0	0
Inga sp	0	0	0	0	0	0	0	0	0	0	0	0	0	0	0	0	0	0
Pouteria sp.2	0	0	0	0	0	0	0	0	0	0	0	0	0	0	0	0	0	0
Schefflera cf. angustissima (Marchal) Frodin	0	0	0	0	0	0	0	0	0	0	0	0	0	0	0	0	0	0
Stylogyne lhotzkyana (A.DC.) Mez	0	0	0	0	0	0	0	0	0	0	0	0	0	0	0	0	0	0
Tachigali paratyensis (Vell.) H.C.Lima	0	0	0	0	0	0	0	0	0	0	0	0	0	0	0	0	0	0
Tachigali sp.1	0	0	0	0	0	0	0	0	0	0	0	0	0	0	0	0	0	0
Tachigali sp.2	0	0	0	0	0	0	0	0	0	0	0	0	0	0	0	0	0	0
Tibouchina pulchra Cogn.	0	0	0	0	0	0	0	0	0	0	0	0	0	0	0	0	0	0
Virola bicuhyba (Schott ex Spreng.) Warb.	0	0	0	0	0	0	0	0	0	0	0	0	0	0	0	0	0	0
Vitex polygama Cham.	0	0	0	0	0	0	0	0	0	0	0	0	0	0	0	0	0	0
Xylopia brasiliensis Spreng.	0	0	0	0	0	0	0	0	0	0	0	0	0	0	0	0	0	0
Cedrela cf. odorata L	0	0	0	0	0	0	0	0	0	0	0	0	0	0	0	0	0	0
Clusia criuva subsp. parviflora Vesque	0	0	0	0	0	0	0	0	0	0	0	0	0	0	0	0	0	0
Cordia sp.3	0	0	0	0	0	0	0	0	0	0	0	0	0	0	0	0	0	0
Ficus gomelleira Kunth & C.D.Bouché	0	0	0	0	0	0	0	0	0	0	0	0	0	0	0	0	0	0
Malouetia cestroides (Nees ex Mart.) Müll. Arg.	0	0	0	0	0	0	0	0	0	0	0	0	0	0	0	0	0	0
Pourouma guianensis Aubl.	0	0	0	0	0	0	0	0	0	0	0	0	0	0	0	0	0	0
Pouteria sp.1	0	0	0	0	0	0	0	0	0	0	0	0	0	0	0	0	0	0
Pseudopiptadenia leptostachya (Benth.) Rauschert	0	0	0	0	0	0	0	0	0	0	0	0	0	0	0	0	0	0
Tachigali sp.3	0	0	0	0	0	0	0	0	0	0	0	0	0	0	0	0	0	0
Borreria verticillata (L.) G.Mey.	0	0	0	0	0	0	0	0	0	0	0	0	0	0	0	0	0	0
Guapira nitida (Mart. ex J.A.Schmidt) Lundell	0	0	0	0	0	0	0	0	0	0	0	0	0	0	0	0	0	0
Maytenus ardisiaefolia Reissek	0	0	0	0	0	0	0	0	0	0	0	0	0	0	0	0	0	0
Merostachys argyronema Lindm.	0	0	0	0	0	0	0	0	0	0	0	0	0	0	0	0	0	0
Myrcia sp.2	0	0	0	0	0	0	0	0	0	0	0	0	0	0	0	0	0	0
Myrcia sp.3	0	0	0	0	0	0	0	0	0	0	0	0	0	0	0	0	0	0
Dalbergia frutescens (Vell.) Britton	0	0	0	0	0	0	0	0	0	0	0	0	0	0	0	0	0	0
Trema micranta (L.) Blume	0	0	0	0	0	0	0	0	0	0	0	0	0	0	0	0	0	0
Myrcia sp.1	0	0	0	0	0	0	0	0	0	0	0	0	0	0	0	0	0	0
Piper cernuum Vell.	0	0	0	0	0	0	0	0	0	0	0	0	0	0	0	0	0	0
Piper cf. gaudichaudianum Kunth	0	0	0	0	0	0	0	0	0	0	0	0	0	0	0	0	0	0
Canavalia ensiformis (L.) DC.	0	0	0	0	0	0	0	0	0	0	0	0	0	0	0	0	0	0
Ctenanthe lanceolata Petersen	0	0	0	0	0	0	0	0	0	0	0	0	0	0	0	0	0	0
Tephrosia candida (Roxb.) DC.	0	0	0	0	0	0	0	0	0	0	0	0	0	0	0	0	0	0
Cyrtocymura scorpioides (Lam.) H.Rob.	0	0	0	0	0	0	0	0	0	0	0	0	0	0	0	0	0	0
Achyrocline sp.1	0	0	0	0	0	0	0	0	0	0	0	0	0	0	0	0	0	0
Marantaceae sp.1	0	0	0	0	0	0	0	0	0	1	0	0	0	0	0	0	0	0
Aloysia gratissima (Gillies & Hook.) Tronc	0	0	0	0	0	0	0	0	0	0	0	0	0	0	0	0	0	0
Ruta graveolens L.	0	0	0	0	0	0	0	0	0	0	0	0	0	0	0	0	0	0
Sansevieria trifasciata Prain	0	0	0	0	0	0	0	0	0	0	0	0	0	0	0	0	0	0
Sansevieria trifasciata 'Laurentii	0	0	0	0	0	0	0	0	0	0	0	0	0	0	0	0	0	0
Petiveria alliacea L.	0	0	0	0	0	0	0	0	0	0	0	0	0	0	0	0	0	0
Tetradenia riparia (Hochst.) Codd	0	0	0	0	0	0	0	0	0	0	0	0	0	0	0	0	0	0
Gallesia integrifolia (Spreng.) Harms	0	0	0	0	0	0	0	0	0	0	0	0	0	0	0	0	0	0
Sambucus cf. canadensis	0	0	0	0	0	0	0	0	0	0	0	0	0	0	0	0	0	0
Scoparia dulcis L.	0	0	0	0	0	0	0	0	0	0	0	0	0	0	0	0	0	0

## Sheet: Others
community	cambury	cambury	cambury	cambury	cambury	cambury	cambury	cambury	cambury	cambury	fazenda	fazenda	fazenda	fazenda	fazenda	fazenda	fazenda	fazenda
informant	Alcides Jorge	Cremilda_da_Cruz_Catarina	Domingos	Eliete	Euclides_jr	Isac	José	Maximiano	Moises Firmino	Oziel Soares	Cirillio	Dn_Aparecida	Dn_Maria	Dn_onofria	Luciana_vieira	Maria_aparecida_vieira	Jose_vieira	vinturante_manoel
Achillea millefolium L.	0	0	0	0	0	0	0	0	0	0	0	0	0	0	0	0	0	0
Achyrocline flaccida(Weinm.) DC.	0	0	0	0	0	0	0	0	0	0	0	1	0	0	0	0	0	0
Aegiphila integrifolia (Jacq.) Moldenke	0	0	0	0	0	0	0	0	0	0	0	0	0	0	0	0	0	0
Ageratum conyzoides L.	0	0	0	0	0	0	0	0	0	0	0	0	0	0	0	0	0	0
Alternanthera brasiliana (L.) Kuntze	0	0	0	0	0	0	0	0	0	0	0	0	0	0	0	0	0	0
Amaranthus blitum L.	0	0	0	0	0	0	0	0	0	0	0	0	0	0	0	0	0	0
Anacardium occidentale L.	0	0	0	0	0	0	0	0	0	0	0	0	0	0	0	0	0	0
Aniba sp.	0	0	0	0	0	0	0	0	0	0	0	0	0	0	0	0	0	0
Annona dolabripetala Raddi	0	0	0	0	0	0	0	0	0	0	0	0	0	0	0	0	0	0
Annona muricata L.	0	0	0	0	0	0	0	0	0	0	0	0	0	0	0	0	0	0
Artocarpus altilis (Parkinson) Fosberg	0	0	0	0	0	0	0	0	0	0	0	0	0	0	0	0	0	0
Astrocaryum aculeatissimum (Schott) Burret	0	0	0	0	0	0	0	0	0	0	0	0	0	0	0	0	0	0
Baccharis sp. [Sect. Caulopterae DC.]	0	0	0	0	0	0	0	0	0	0	0	0	0	0	0	0	0	0
Bactris gasipaes Kunth	0	0	0	0	0	0	0	0	0	0	0	0	0	0	0	0	0	0
Bambusa cf. vulgaris Schrad. ex J.C.Wendl.	0	0	0	0	0	0	0	0	0	0	0	0	0	0	0	0	0	0
Bambusa sp.	0	0	0	0	0	0	0	0	0	0	0	0	0	0	0	0	0	0
Bathysa mendoncaei K.Schum.	0	0	0	0	0	0	0	0	0	0	0	0	0	0	0	0	0	0
Bidens pilosa L.	0	0	0	0	0	0	0	0	0	0	0	0	0	0	0	0	0	0
Bixa orellana L.	0	0	0	0	0	0	0	0	0	0	0	0	0	0	0	0	0	0
Brassica oleracea L. [Gr. Acephala]	0	0	0	0	0	0	0	0	0	0	0	0	0	0	0	0	0	0
Buchena viakleinii Exell	0	0	0	0	0	0	0	0	0	0	0	0	0	0	0	0	0	0
Bunchosia glandulifera (Jacq.) Kunth	0	0	0	0	0	0	0	0	0	0	0	0	0	0	0	0	0	0
Campomanesia phaea (O.Berg) Landrum	0	0	0	0	0	0	0	0	0	0	0	0	0	0	0	0	0	0
Capsicum sp.	0	0	0	0	0	0	0	0	0	0	0	0	0	0	0	0	0	0
Cecropia cf. pachystachya Trécul	0	0	0	0	0	0	0	0	0	0	0	0	0	0	0	0	0	0
Cecropia glaziovii Snethl.	0	0	0	0	0	0	0	0	0	0	0	0	0	0	0	0	0	0
Cecropia pachystachya Trécul	0	0	0	0	0	0	0	0	0	0	0	0	0	0	0	0	0	0
Cedrela fissilis Vell.	0	0	0	0	0	0	0	0	0	0	0	0	0	1	0	0	0	0
cf. Bathysa	0	0	0	0	0	0	0	0	0	0	0	0	0	0	0	0	0	0
cf. Furcraea foetida (L.) Haw.	0	0	0	0	0	0	0	0	0	0	1	0	0	0	0	0	0	0
cf. Pterocarpus rohrii Vahl	0	0	0	0	0	0	0	0	0	0	0	0	0	0	0	0	0	0
cf. Thoracocarpus bissectus (Vell.) Harling	0	0	0	0	0	0	0	0	0	0	0	0	0	0	0	0	0	0
Cichorium cf. intybus L.	0	0	0	0	0	0	0	0	0	0	0	0	0	0	0	0	0	0
Citrus reticulata Blanco	0	0	0	0	0	0	0	0	0	0	0	0	0	0	0	0	0	0
Citrus x limon (L.) Osbeck	0	0	0	0	0	0	0	0	0	0	0	0	0	0	0	0	0	0
Clidemia hirta (L.) D.Don	0	0	0	0	0	0	0	0	0	0	0	0	0	0	0	0	0	0
Coffea arabica L.	0	0	0	0	0	0	0	0	0	0	0	0	0	0	0	0	0	0
Colocasia esculenta (L.) Schott	0	0	0	0	0	0	0	0	0	0	0	0	0	0	0	0	0	0
Conyza cf. bonariensis (L.) Cronquist	0	0	0	0	0	0	0	0	0	0	0	0	0	0	0	0	0	0
Cordia sellowiana Cham.	0	0	0	0	0	0	0	0	0	0	0	0	0	0	0	0	0	0
Cordia sp.	0	0	0	0	0	0	0	0	0	0	0	0	0	0	0	0	0	0
Costus arabicus L.	0	0	0	0	0	0	0	0	0	0	0	0	0	0	0	0	0	0
Cryptocarya mandioccana Meisn.	0	0	0	0	0	0	0	0	0	0	0	0	0	0	0	0	0	0
Cryptocarya saligna Mez	0	0	0	0	0	0	0	0	0	0	0	0	0	0	0	0	0	0
Cupania oblongifolia Mart.	0	0	0	0	0	0	0	0	0	0	0	0	0	0	0	0	0	0
Cuphea carthagenensis (Jacq.) J.F.Macbr.	0	0	0	0	0	0	0	0	0	0	0	0	0	0	0	0	0	0
Curcuma longa L.	0	0	0	0	0	0	0	0	0	0	0	0	0	0	0	0	0	0
Cymbopogon citratus (DC.) Stapf	0	0	0	0	0	0	0	0	0	0	0	0	0	0	0	0	0	0
Cymbopogon nardus (L.)Rendle	0	0	0	0	0	0	0	0	0	0	0	0	0	0	0	0	0	0
Davilla rugosa Poir.	0	0	0	0	0	0	0	0	0	0	0	0	0	0	0	0	0	0
Dioscorea bulbifera L.	0	0	0	0	0	0	0	0	0	0	0	0	0	0	0	0	0	0
Dysphania ambrosioides (L.) Mosyakin & Clemants	0	0	0	0	0	0	0	0	0	0	0	0	0	0	0	0	0	0
Echinodorus grandiflorus (Cham. & Schltdl.) Micheli	0	0	0	0	0	0	0	0	0	0	0	0	0	0	0	0	0	0
Elaeocarpus cf. serratus L.	0	0	0	0	0	0	0	0	0	0	0	0	0	0	0	0	0	0
Emilia sonchifolia (L.) DC.	0	0	0	0	0	0	0	0	0	0	0	0	0	0	0	0	0	0
Erechtites valerianifolius (Wolf) DC.	0	0	0	0	0	0	0	0	0	0	0	0	0	0	0	0	0	0
Eryngium cf. coronatum Hook. & Arn.	0	0	0	0	0	0	0	0	0	0	0	0	0	0	0	0	0	0
Eryngium foetidum L	0	0	0	0	0	0	0	0	0	0	0	0	0	0	0	0	0	0
Erythroxylum pulchrum A.St.-Hil.	0	0	0	0	0	0	0	0	0	0	0	0	0	0	0	0	0	0
Eugenia astringens Cambess.	0	0	0	0	0	0	0	0	0	0	0	0	0	0	0	0	0	0
Eugenia brasiliensis Lam.	0	0	0	0	0	0	0	0	0	0	0	0	0	0	0	0	0	0
Eugenia cf. stipitata McVaugh	0	0	0	0	0	0	0	0	0	0	0	0	0	0	0	0	0	0
Eugenia uniflora L.	0	0	0	0	0	0	0	0	0	0	0	0	0	0	0	0	0	0
Euterpe edulis Mart.	0	0	0	0	0	0	0	0	0	0	0	0	0	0	0	0	0	0
Euterpe oleracea Mart.	0	0	0	0	0	0	0	0	0	0	0	0	0	0	0	0	0	0
Faramea hymenocalyx M.Gomes	0	0	0	0	0	0	0	0	0	0	0	0	0	0	0	0	0	0
Ficus adhatodifolia Schott	0	0	0	0	0	0	0	0	0	0	0	1	0	0	0	0	0	1
Foeniculum vulgare Mill.	0	0	0	0	0	0	0	0	0	0	0	0	0	0	0	0	0	0
Furcraea foetida (L.) Haw. [cf.]	0	0	0	0	0	0	0	0	0	0	0	0	0	0	0	0	0	0
Garcinia gardneriana (Planch. & Triana) Zappi	0	0	0	0	0	0	0	0	0	0	0	0	0	0	0	0	0	0
Geonoma elegans Mart.	0	0	0	0	0	0	0	0	0	0	0	0	0	0	0	0	0	0
Gossypium sp.	0	0	0	0	0	0	0	0	0	0	0	0	0	0	0	0	0	0
Guarea macrophylla Vahl	0	0	0	0	0	0	0	0	0	0	0	0	0	0	0	0	0	0
Guatteria australis A.St.-Hil.	0	0	0	0	0	0	0	0	0	0	0	0	0	0	0	0	0	0
Gymnanthemum amygdalinum (Delile) Sch.Bip. ex Walp.	0	0	0	0	0	0	0	0	0	0	0	0	0	0	0	0	0	0
Handroanthus albus (Cham.) Mattos	0	0	0	0	0	0	0	0	0	0	0	0	0	0	0	0	0	0
Hedychium coronarium J.Koenig	0	0	0	0	0	0	0	0	0	0	0	0	0	0	0	0	0	0
Huberia ovalifolia DC	0	0	0	0	0	0	0	0	0	0	0	0	0	0	0	0	0	0
Hyeronima alchorneoides Allemão	0	0	0	0	0	0	0	0	0	0	0	0	0	0	0	0	0	0
Hymenaea altissima Ducke	0	0	0	0	0	0	0	0	0	0	0	0	0	0	0	0	0	0
Hypochaeris chillensis (Kunth) Britton	0	0	0	0	0	0	0	0	0	0	0	0	0	0	0	0	0	0
Imperata sp.	0	0	0	0	0	0	0	0	0	0	0	0	0	0	0	0	0	0
Inga edulis Mart.	0	0	0	0	0	0	0	0	0	0	0	0	0	0	0	0	0	0
Inga marginata Willd.	0	0	0	0	0	0	0	0	0	0	0	0	0	0	0	0	0	0
Ipomoea batatas (L.) Lam.	0	0	0	0	0	0	0	0	0	0	0	0	0	0	0	0	0	0
Jacaranda puberula Cham.	0	0	0	0	0	0	0	0	0	0	0	0	0	0	0	0	0	0
Justicia pectoralis Jacq.	0	0	0	0	0	0	0	0	0	0	0	0	0	0	0	0	0	0
Lacistema lucidum Schnizl	0	0	0	0	0	0	0	0	0	0	0	0	0	0	0	0	0	0
Lactuca indica L.	0	0	0	0	0	0	0	0	0	0	0	0	0	0	0	0	0	0
Lippia alba (Mill.) N.E.Br. ex P.Wilson	0	0	0	0	0	0	0	0	0	0	0	0	0	0	0	0	0	0
Mabea piriri Aubl.	0	0	0	0	0	0	0	0	0	0	0	0	0	0	0	0	0	0
Manihot esculenta Crantz	0	0	0	0	0	0	0	0	0	0	0	0	0	0	0	0	0	0
Mentha sp.	0	0	0	0	0	0	0	0	0	0	0	0	0	0	0	0	0	0
Miconia cinnamomifolia (DC.) Naudin	0	0	0	0	0	0	0	0	0	0	0	0	0	0	0	0	0	0
Mikania laevigata Sch.Bip. ex Baker	0	0	0	0	0	0	0	0	0	0	0	0	0	0	0	0	0	0
Morus nigra L.	0	0	0	0	0	0	0	0	0	0	0	0	0	0	0	0	0	0
Myrcia neoriedeliana E.Lucas & C.E.Wilson	0	0	0	0	0	0	0	0	0	0	0	0	0	0	0	0	0	0
Myrcia spectabilis DC.	0	0	0	0	0	0	0	0	0	0	0	0	0	0	0	0	0	0
Myrciaria glazioviana (Kiaersk.) G.M.Barroso ex Sobral	0	0	0	0	0	0	0	0	0	0	0	0	0	0	0	0	0	0
Myrocarpus frondosus Allemão	0	0	0	0	0	0	0	0	0	0	0	0	0	0	0	0	0	0
Myrsine coriacea (Sw.) R.Br. ex Roem. & Schult.	0	0	0	0	0	0	0	0	0	0	0	0	0	0	0	0	0	0
Ocimum americanum L.	0	0	0	0	0	0	0	0	0	0	0	0	0	0	0	0	0	0
Ocimum campechianum Mill.	0	0	0	0	0	0	0	0	0	0	0	0	0	0	0	0	0	0
Ocimum gratissimum L.	0	0	0	0	0	0	0	0	0	0	0	0	0	0	0	0	0	0
Pachira glabra Pasq.	0	0	0	0	0	0	0	0	0	0	0	0	0	0	0	0	0	0
Pera glabrata (Schott) Poepp. ex Baill.	0	0	0	0	0	0	0	0	0	0	0	0	0	0	0	0	0	0
Pfaffia glomerata (Spreng.) Pedersen	0	0	0	0	0	0	0	0	0	0	0	0	0	0	0	0	0	0
Philodendron eximium Schott	0	0	0	0	0	0	0	0	0	0	0	0	0	0	0	0	0	0
Philodendron martianum Engl.	0	0	0	0	0	0	0	0	0	0	0	0	0	0	0	0	0	0
Phyllanthus niruri L.	0	0	0	0	0	0	0	0	0	0	0	0	0	0	0	0	0	0
Piper mollicomum Kunth	0	0	0	0	0	0	0	0	0	0	0	0	0	0	0	0	0	0
Piper scutifolium Yunck	0	0	0	0	0	0	0	0	0	0	0	0	0	0	0	0	0	0
Piptadenia gonoacantha (Mart.) J.F.Macbr.	0	0	0	0	0	0	0	0	0	0	0	0	0	0	0	0	0	0
Plantago australis Lam.	0	0	0	0	0	0	0	0	0	0	0	0	0	0	0	0	0	0
Plectranthus amboinicus (Lour.) Spreng.	0	0	0	0	0	0	0	0	0	0	0	0	0	0	0	0	0	0
Plectranthus barbatus Andrews	0	0	0	0	0	0	0	0	0	0	0	0	0	0	0	0	0	0
Plinia edulis (Vell.) Sobral	0	0	0	0	0	0	0	0	0	0	0	0	0	0	0	0	0	0
Polygala paniculata L.	0	0	0	0	0	0	0	0	0	0	0	0	0	0	0	0	0	0
Pouteria caimito (Ruiz & Pav.) Radlk.	0	0	0	0	0	0	0	0	0	0	0	0	0	0	0	0	0	0
Psidium cattleianum Sabine	0	0	0	0	0	0	0	0	0	0	0	0	0	0	0	0	0	0
Psidium guajava L.	0	0	0	0	0	0	0	0	0	0	0	0	0	0	0	0	0	0
Renealmia petasites Gagnep.	0	0	0	0	0	0	0	0	0	0	0	0	0	0	0	0	0	0
Ricinus communis L.	0	0	0	0	0	0	0	0	0	0	0	0	0	0	0	0	0	0
Rubus rosifolius Sm.	0	0	0	0	0	0	0	0	0	0	0	0	0	0	0	0	0	0
Rustia formosa (Cham. & Schltdl.) Klotzsch	0	0	0	0	0	0	0	0	0	0	0	0	0	0	0	0	0	0
Schinus terebinthifoliaRaddi	0	0	0	0	0	0	0	0	0	0	0	0	0	0	0	0	0	0
Schizolobium parahyba (Vell.) S.F.Blake	0	0	0	0	0	0	0	0	0	0	0	0	0	0	0	0	0	0
Sida planicaulis Cav.	0	0	0	0	0	0	0	0	0	0	0	0	0	0	0	0	0	0
Sida rhombifolia L.	0	0	0	0	0	0	0	0	0	0	0	0	0	0	0	0	0	0
Solanum americanum Mill.	0	0	0	0	0	0	0	0	0	0	0	0	0	0	0	0	0	0
Solanum capsicoides All.	0	0	0	0	0	0	0	0	0	0	0	0	0	0	0	0	0	0
Solanum pseudoquina A.St.-Hil.	0	0	0	0	0	0	0	0	0	0	0	0	0	0	0	0	0	0
Sorocea cf. guilleminiana Gaudich.	0	0	0	0	0	0	0	0	0	0	0	0	0	0	0	0	0	0
sp. 2 - Myrtaceae	0	0	0	0	0	0	0	0	0	0	0	0	0	0	0	0	0	0
Stachytarpheta cayennensis (Rich.) Vahl	0	0	0	0	0	0	0	0	0	0	0	0	0	0	0	0	0	0
Swartzia oblata R.S.Cowan	0	0	0	0	0	0	0	0	0	0	0	0	0	0	0	0	0	0
Swartzia simplex var. grandiflora (Raddi) R.S.Cowan	0	0	0	0	0	0	0	0	0	0	0	0	0	0	0	0	0	0
Syagrus pseudococos (Raddi) Glassman	0	0	0	0	0	0	0	0	0	0	0	0	0	0	0	0	0	0
Syzygium jambos (L.) Alston	0	0	0	0	0	0	0	0	0	0	0	0	0	0	0	0	0	0
Syzygium malaccense (L.) Merr. & L.M.Perry	0	0	0	0	0	0	0	0	0	0	0	0	0	0	0	0	0	0
Tabernaemontana laeta Mart.	0	0	0	0	0	0	0	0	0	0	0	0	0	0	0	0	0	0
Theobroma cacao L.	0	0	0	0	0	0	0	0	0	0	0	0	0	0	0	0	0	0
Typha domingensis Pers.	0	0	0	0	0	0	0	0	0	0	0	0	0	0	0	0	0	0
Urera baccifera (L.) Gaudich. ex Wedd.	0	0	0	0	0	0	0	0	0	0	0	0	0	0	0	0	0	0
Varronia curassavica Jacq.	0	0	0	0	0	0	0	0	0	0	0	0	0	0	0	0	0	0
Vernonanthura beyrichii (Less.) H.Rob.	0	0	0	0	0	0	0	0	0	0	0	0	0	0	0	0	0	0
Xanthosoma taioba E.G.Gonç.	0	0	0	0	0	0	0	0	0	0	0	0	0	0	0	0	0	0
Zanthoxylum rhoifolium Lam.	0	0	0	0	0	0	0	0	0	0	0	0	0	0	0	0	0	0
Aleurites moluccanus (L.) Willd	0	0	0	0	0	0	0	0	0	0	0	0	0	0	0	0	0	0
Allium chinense G. Don	0	0	0	0	0	0	0	0	0	0	0	0	0	0	0	0	0	0
Allium fistulosum L.	0	0	0	0	0	0	0	0	0	0	0	0	0	0	0	0	0	0
Allium tuberosum	0	0	0	0	0	0	0	0	0	0	0	0	0	0	0	0	0	0
Annona montana Macf.	0	0	0	0	0	0	0	0	0	0	0	0	0	0	0	0	0	0
Artocarpus heterophyllus Lam	0	0	0	0	0	0	0	0	0	0	0	0	0	0	0	0	0	0
Astrocaryum aculeatissimum (Schott) Burret	0	0	0	0	0	0	0	0	0	0	0	0	0	0	0	0	0	0
Bactris sp.	0	0	0	0	0	0	0	0	0	0	0	0	0	0	0	0	0	0
Cajanus cajan (L.) Huth	0	0	0	0	0	0	0	0	0	0	0	0	0	0	0	0	0	0
Citharexylum myrianthum Cham.	0	0	0	0	0	0	0	0	0	0	0	0	0	0	0	0	0	0
Citrus sinensis (L.) Osbeck	0	0	0	0	0	0	0	0	0	0	0	0	0	0	0	0	0	0
Dioscorea sp.	0	0	0	0	0	0	0	0	0	0	0	0	0	0	0	0	0	0
Ecclinusa ramiflora Mart.	0	0	0	0	0	0	0	0	0	0	0	0	0	0	0	0	0	0
Elephantopus mollis Kunth	0	0	0	0	0	0	0	0	0	0	0	0	0	0	0	0	0	0
Eugenia cf. multicostata D. Legrand	0	0	0	0	0	0	0	0	0	0	0	0	0	0	0	0	0	0
Eugenia sp.	0	0	0	0	0	0	0	0	0	0	0	0	0	0	0	0	0	0
Eugenia sulcata Spring ex Mart.	0	0	0	0	0	0	0	0	0	0	0	0	0	0	0	0	0	0
Inga cf. lenticellata Benth.	0	0	0	0	0	0	0	0	0	0	0	0	0	0	0	0	0	0
Jacaratia spinosa (Aubl.) A.DC.	0	0	0	0	0	0	0	0	0	0	0	0	0	0	0	0	0	0
Licania sp.2	0	0	0	0	0	0	0	0	0	0	0	0	0	0	0	0	0	0
Marantaceae sp.2	0	0	0	0	0	0	0	0	0	0	0	0	0	0	0	0	0	0
Miconia dodecandra Cogn.	0	0	0	0	0	0	0	0	0	0	0	0	0	0	0	0	0	0
Miconia prasina (Sw.) DC.	0	0	0	0	0	0	0	0	0	0	0	0	0	0	0	0	0	0
Micropholis crassipedicellata (Mart. & Eichler) Pierre	0	0	0	0	0	0	0	0	0	0	0	0	0	0	0	0	0	0
Mimusops coriacea (A.DC.) Miq.	0	0	0	0	0	0	0	0	0	0	0	0	0	0	0	0	0	0
Musa sp.	0	0	0	0	0	0	0	0	0	0	0	0	0	0	0	0	0	0
Nectandra oppositifolia Nees	0	0	0	0	0	0	0	0	0	0	0	0	0	0	0	0	0	0
Passiflora miersii Mast.	0	0	0	0	0	0	0	0	0	0	0	0	0	0	0	0	0	0
Persea americana Mill.	0	0	0	0	0	0	0	0	0	0	0	0	0	0	0	0	0	0
Phaseolus vulgaris L.	0	0	0	0	0	0	0	0	0	0	0	0	0	0	0	0	0	0
Plinia sp.	0	0	0	0	0	0	0	0	0	0	0	0	0	0	0	0	0	0
Rubus urticifolius Poir.	0	0	0	0	0	0	0	0	0	0	0	0	0	0	0	0	0	0
Solanum scuticum M.Nee	0	0	0	0	0	0	0	0	0	0	0	0	0	0	0	0	0	0
Tetrorchidium sp.	0	0	0	0	0	0	0	0	0	0	0	0	0	0	0	0	0	0
Trichilia silvatica C.DC.	0	0	0	0	0	0	0	0	0	0	0	0	0	0	0	0	0	0
Urera nitida (Vell.) P.Brack	0	0	0	0	0	0	0	0	0	0	0	0	0	0	0	0	0	0
Actinostemon verticillatus (Klotzsch) Baill.	0	0	0	0	0	0	0	0	0	0	0	0	0	0	0	0	0	0
Andira fraxinifolia Benth.	0	0	0	0	0	0	0	0	0	0	0	0	0	0	0	0	0	0
Brosimum guianense (Aubl.) Huber	0	0	0	0	0	0	0	0	0	0	0	0	0	0	0	0	0	0
Cabralea canjerana (Vell.) Mart.	0	0	0	0	0	0	0	0	0	0	0	0	0	0	0	0	0	0
Cariniana estrellensis (Raddi) Kuntze	0	0	0	0	0	0	0	0	0	0	0	0	0	0	0	0	0	0
cf. Hymenolobium janeirense Kuhlm.	0	0	0	0	0	0	0	0	0	0	0	0	0	0	0	0	0	0
Citharexylum myrianthum Cham.	0	0	0	0	0	0	0	0	0	0	0	0	0	0	0	0	0	0
Cordia sp.2	0	0	0	0	0	0	0	0	0	0	0	0	0	0	0	0	0	0
Eriotheca pentaphylla (Vell. & K.Schum.) A.Robyns	0	0	0	0	0	0	0	0	0	0	0	0	0	0	0	0	0	0
Geonoma sp.	0	0	0	0	0	0	0	0	0	0	0	0	0	0	0	0	0	0
Hedyosmum brasiliense Miq.	0	0	0	0	0	0	0	0	0	0	0	0	0	0	0	0	0	0
Inga sp	0	0	0	0	0	0	0	0	0	0	0	0	0	0	0	0	0	0
Pouteria sp.2	0	0	0	0	0	0	0	0	0	0	0	0	0	0	0	0	0	0
Schefflera cf. angustissima (Marchal) Frodin	0	0	0	0	0	0	0	0	0	0	0	0	0	0	0	0	0	0
Stylogyne lhotzkyana (A.DC.) Mez	0	0	0	0	0	0	0	0	0	0	0	0	0	0	0	0	0	0
Tachigali paratyensis (Vell.) H.C.Lima	0	0	0	0	0	0	0	0	0	0	0	0	0	0	0	0	0	0
Tachigali sp.1	0	0	0	0	0	0	0	0	0	0	0	0	0	0	0	0	0	0
Tachigali sp.2	0	0	0	0	0	0	0	0	0	0	0	0	0	0	0	0	0	0
Tibouchina pulchra Cogn.	0	0	0	0	0	0	0	0	0	0	0	0	0	0	0	0	0	0
Virola bicuhyba (Schott ex Spreng.) Warb.	0	0	0	0	0	0	0	0	0	0	0	0	0	0	0	0	0	0
Vitex polygama Cham.	0	0	0	0	0	0	0	0	0	0	0	0	0	0	0	0	0	0
Xylopia brasiliensis Spreng.	0	0	0	0	0	0	0	0	0	0	0	0	0	0	0	0	0	0
Cedrela cf. odorata L	0	0	0	0	0	0	0	0	0	0	0	0	0	0	0	0	0	0
Clusia criuva subsp. parviflora Vesque	0	0	0	0	0	0	0	0	0	0	0	0	0	0	0	0	0	0
Cordia sp.3	0	0	0	0	0	0	0	0	0	0	0	0	0	0	0	0	0	0
Ficus gomelleira Kunth & C.D.Bouché	0	0	0	0	0	0	0	0	0	0	0	0	0	0	0	0	0	0
Malouetia cestroides (Nees ex Mart.) Müll. Arg.	0	0	0	0	0	0	0	0	0	0	0	0	0	0	0	0	0	0
Pourouma guianensis Aubl.	0	0	0	0	0	0	0	0	0	0	0	0	0	0	0	0	0	0
Pouteria sp.1	0	0	0	0	0	0	0	0	0	0	0	0	0	0	0	0	0	0
Pseudopiptadenia leptostachya (Benth.) Rauschert	0	0	0	0	0	0	0	0	0	0	0	0	0	0	0	0	0	0
Tachigali sp.3	0	0	0	0	0	0	0	0	0	0	0	0	0	0	0	0	0	0
Borreria verticillata (L.) G.Mey.	0	0	0	0	0	0	0	0	0	0	0	0	0	0	0	0	0	0
Guapira nitida (Mart. ex J.A.Schmidt) Lundell	0	0	0	0	0	0	0	0	0	0	0	0	0	0	0	0	0	0
Maytenus ardisiaefolia Reissek	0	0	0	0	0	0	0	0	0	0	0	0	0	0	0	0	0	0
Merostachys argyronema Lindm.	0	0	0	0	0	0	0	0	0	0	0	0	0	0	0	0	0	0
Myrcia sp.2	0	0	0	0	0	0	0	0	0	0	0	0	0	0	0	0	0	0
Myrcia sp.3	0	0	0	0	0	0	0	0	0	0	0	0	0	0	0	0	0	0
Dalbergia frutescens (Vell.) Britton	0	0	0	0	0	0	0	0	0	0	0	0	0	0	0	0	0	0
Trema micranta (L.) Blume	0	0	0	0	0	0	0	0	0	0	0	0	0	0	0	0	0	0
Myrcia sp.1	0	0	0	0	0	0	0	0	0	0	0	0	0	0	0	0	0	0
Piper cernuum Vell.	0	0	0	0	0	0	0	0	0	0	0	0	0	0	0	0	0	0
Piper cf. gaudichaudianum Kunth	0	0	0	0	0	0	0	0	0	0	0	0	0	0	0	0	0	0
Canavalia ensiformis (L.) DC.	0	0	0	0	0	0	0	0	0	0	0	0	0	0	0	0	0	0
Ctenanthe lanceolata Petersen	0	0	0	0	0	0	0	0	0	0	0	0	0	0	0	0	0	0
Tephrosia candida (Roxb.) DC.	0	0	0	0	0	0	0	0	0	0	0	0	0	0	0	0	0	0
Cyrtocymura scorpioides (Lam.) H.Rob.	0	0	0	0	0	0	0	0	0	0	0	0	0	0	0	0	0	0
Achyrocline sp.1	0	0	0	0	0	0	0	0	0	0	0	0	0	0	0	0	0	0
Marantaceae sp.1	0	0	0	0	0	0	0	0	0	0	0	0	0	0	0	0	0	0
Aloysia gratissima (Gillies & Hook.) Tronc	0	0	0	0	0	0	0	0	0	0	0	0	0	0	0	0	0	0
Ruta graveolens L.	0	0	0	0	0	0	0	0	0	0	0	0	0	0	0	0	0	0
Sansevieria trifasciata Prain	0	0	0	0	0	0	0	0	0	0	0	0	0	0	0	0	0	0
Sansevieria trifasciata 'Laurentii	0	0	0	0	0	0	0	0	0	0	0	0	0	0	0	0	0	0
Petiveria alliacea L.	0	0	0	0	0	0	0	0	0	0	0	0	0	0	0	0	0	0
Tetradenia riparia (Hochst.) Codd	0	0	0	0	0	0	0	0	0	0	0	0	0	0	0	0	0	0
Gallesia integrifolia (Spreng.) Harms	0	0	0	0	0	0	0	0	0	0	0	0	0	0	0	0	0	0
Sambucus cf. canadensis	0	0	0	0	0	0	0	0	0	0	0	0	0	0	0	0	0	0
Scoparia dulcis L.	0	0	0	0	0	0	0	0	0	0	0	0	0	0	0	0	0	0
